# Supplementary material
Source: publisher figshare collection journal article supplement (https://gsajournals.figshare.com/articles/dataset/_/6716033)
Supplement: Supplementary file 1 [file 2]

## Sheet: TableS5a_chromosomal short arm
SolCAP_SNP_ID	chr_v403	position
solcap_snp_c2_1296	chr10	139451
solcap_snp_c1_305	chr10	339062
solcap_snp_c1_307	chr10	339749
solcap_snp_c1_329	chr10	565197
solcap_snp_c2_1305	chr10	593933
solcap_snp_c1_335	chr10	706568
solcap_snp_c1_357	chr10	1056701
solcap_snp_c2_1475	chr10	1121595
solcap_snp_c2_826	chr10	1204144
solcap_snp_c2_942	chr10	1674751
solcap_snp_c2_944	chr10	1691574
solcap_snp_c2_950	chr10	1697864
solcap_snp_c2_984	chr10	1759258
solcap_snp_c2_989	chr10	1779020
solcap_snp_c2_992	chr10	1861465
solcap_snp_c2_1000	chr10	1885602
solcap_snp_c2_1001	chr10	1885634
solcap_snp_c1_274	chr10	1960699
solcap_snp_c1_16114	chr10	2093720
solcap_snp_c2_1066	chr10	2218157
solcap_snp_c2_1077	chr10	2345887
solcap_snp_c2_1091	chr10	2351359
solcap_snp_c2_1092	chr10	2351455
solcap_snp_c2_1093	chr10	2352583
solcap_snp_c2_1096	chr10	2352858
solcap_snp_c2_1097	chr10	2353088
solcap_snp_c2_1098	chr10	2353098
solcap_snp_c2_1101	chr10	2354869
solcap_snp_c2_1102	chr10	2356573
solcap_snp_c2_1103	chr10	2356599
solcap_snp_c2_1104	chr10	2356600
solcap_snp_c2_1106	chr10	2356795
solcap_snp_c1_287	chr10	2357803
solcap_snp_c2_1108	chr10	2375168
solcap_snp_c1_288	chr10	2375287
solcap_snp_c2_1113	chr10	2382807
solcap_snp_c1_289	chr10	2468562
solcap_snp_c2_1157	chr10	2487346
solcap_snp_c2_1181	chr10	2532943
solcap_snp_c2_1209	chr10	2660050
solcap_snp_c2_1220	chr10	2666937
solcap_snp_c2_1263	chr10	2741776
solcap_snp_c2_34449	chr10	3209868
solcap_snp_c2_34471	chr10	3287163
solcap_snp_c1_10351	chr10	3340707
solcap_snp_c2_34459	chr10	3608967
solcap_snp_c2_34461	chr10	3610040
solcap_snp_c2_54142	chr10	3785871
solcap_snp_c2_54140	chr10	3789697
solcap_snp_c2_54139	chr10	3791291
solcap_snp_c2_54134	chr10	3809422
solcap_snp_c2_54124	chr10	3821839
solcap_snp_c2_54122	chr10	3823854
solcap_snp_c2_54116	chr10	3830247
solcap_snp_c2_44249	chr10	3908588
solcap_snp_c1_13025	chr10	3970339
solcap_snp_c2_44264	chr10	3988349
solcap_snp_c2_44266	chr10	3991078
solcap_snp_c1_13006	chr10	4043034
solcap_snp_c1_7776	chr10	4409005
solcap_snp_c2_24711	chr10	4449324
solcap_snp_c2_24717	chr10	4503619
solcap_snp_c2_24739	chr10	4606889
solcap_snp_c2_24745	chr10	4622412
solcap_snp_c1_7793	chr10	4622583
solcap_snp_c2_24746	chr10	4622646
solcap_snp_c1_7794	chr10	4622719
solcap_snp_c2_24747	chr10	4622745
solcap_snp_c1_7801	chr10	4662747
solcap_snp_c1_7803	chr10	4663315
solcap_snp_c1_7805	chr10	4663515
solcap_snp_c2_57296	chr10	4816432
solcap_snp_c1_16148	chr10	4869289
solcap_snp_c1_12588	chr10	5026436
solcap_snp_c2_42733	chr10	5182178
solcap_snp_c1_12584	chr10	5232221
solcap_snp_c2_44766	chr11	121583
solcap_snp_c2_44712	chr11	175478
solcap_snp_c2_13345	chr11	436865
solcap_snp_c2_13350	chr11	437208
solcap_snp_c2_13355	chr11	437672
solcap_snp_c2_13364	chr11	454847
solcap_snp_c1_4296	chr11	616220
solcap_snp_c2_13419	chr11	761409
solcap_snp_c2_13431	chr11	788222
solcap_snp_c2_13432	chr11	789955
solcap_snp_c1_4319	chr11	939591
solcap_snp_c1_4322	chr11	939924
solcap_snp_c1_4328	chr11	940359
solcap_snp_c1_4336	chr11	1042744
solcap_snp_c1_4347	chr11	1163793
solcap_snp_c2_13566	chr11	1234382
solcap_snp_c2_37233	chr11	1586645
solcap_snp_c2_37227	chr11	1612650
solcap_snp_c1_11092	chr11	1676812
solcap_snp_c1_11100	chr11	1717451
solcap_snp_c2_37185	chr11	1743782
solcap_snp_c2_37194	chr11	1771819
solcap_snp_c2_37201	chr11	1775392
solcap_snp_c1_10069	chr11	2259927
solcap_snp_c2_33661	chr11	2262006
solcap_snp_c2_33657	chr11	2274063
solcap_snp_c2_33635	chr11	2362124
solcap_snp_c2_33683	chr11	2464067
solcap_snp_c2_33678	chr11	2464166
solcap_snp_c1_2181	chr11	2568114
solcap_snp_c1_2180	chr11	2568122
solcap_snp_c1_2162	chr11	2580985
solcap_snp_c2_6004	chr11	2724803
solcap_snp_c2_6002	chr11	2725104
solcap_snp_c2_6001	chr11	2725118
solcap_snp_c2_6000	chr11	2725245
solcap_snp_c2_5974	chr11	2814590
solcap_snp_c1_2139	chr11	2815835
solcap_snp_c2_5966	chr11	2832278
solcap_snp_c2_5960	chr11	2854841
solcap_snp_c2_5957	chr11	2855044
solcap_snp_c1_2275	chr11	3149876
solcap_snp_c2_6235	chr11	3268964
solcap_snp_c2_6185	chr11	3572445
solcap_snp_c2_6173	chr11	3629307
solcap_snp_c1_2212	chr11	3721765
solcap_snp_c2_6126	chr11	3822710
solcap_snp_c2_6108	chr11	3886505
solcap_snp_c2_6100	chr11	3887589
solcap_snp_c2_6035	chr11	3895011
solcap_snp_c1_2314	chr11	3928601
solcap_snp_c2_6303	chr11	3943211
solcap_snp_c2_6302	chr11	3943269
solcap_snp_c1_2280	chr11	3948374
solcap_snp_c2_6256	chr11	3957986
solcap_snp_c1_2209	chr11	4001281
solcap_snp_c2_47382	chr11	4250278
solcap_snp_c1_14083	chr11	4317208
solcap_snp_c2_37638	chr11	4553298
solcap_snp_c1_16301	chr11	4681805
solcap_snp_c1_11246	chr11	4745919
solcap_snp_c2_57429	chr11	4851523
solcap_snp_c2_21058	chr11	4996604
solcap_snp_c2_20941	chr11	5048441
solcap_snp_c2_20942	chr11	5048506
solcap_snp_c2_20944	chr11	5048824
solcap_snp_c2_20945	chr11	5050102
solcap_snp_c2_20946	chr11	5051415
solcap_snp_c2_20947	chr11	5051445
solcap_snp_c2_20948	chr11	5051572
solcap_snp_c2_20952	chr11	5157690
solcap_snp_c2_20970	chr11	5190940
solcap_snp_c2_21020	chr11	5330920
solcap_snp_c2_21041	chr11	5421809
solcap_snp_c1_6643	chr11	5515254
solcap_snp_c2_57917	chr11	5647945
solcap_snp_c2_21066	chr11	5735381
solcap_snp_c2_21071	chr11	5736458
solcap_snp_c2_21072	chr11	5736611
solcap_snp_c2_21073	chr11	5736647
solcap_snp_c1_7656	chr11	5946753
solcap_snp_c2_23915	chr11	5977340
solcap_snp_c1_7658	chr11	6010692
solcap_snp_c2_23921	chr11	6017114
solcap_snp_c2_23923	chr11	6017871
solcap_snp_c2_23942	chr11	6263435
solcap_snp_c2_23943	chr11	6263603
solcap_snp_c2_23944	chr11	6263927
solcap_snp_c2_23958	chr11	6278396
solcap_snp_c2_23965	chr11	6282389
solcap_snp_c2_23975	chr11	6415427
solcap_snp_c2_23976	chr11	6415624
solcap_snp_c2_23987	chr11	6480636
solcap_snp_c2_23988	chr11	6480977
solcap_snp_c2_44868	chr11	6771527
solcap_snp_c1_15787	chr11	6943511
solcap_snp_c2_35856	chr11	7298363
solcap_snp_c2_2896	chr11	7479525
solcap_snp_c2_52749	chr11	7723697
solcap_snp_c2_12368	chr11	8096420
solcap_snp_c2_12333	chr11	8281368
solcap_snp_c2_12290	chr11	8477402
solcap_snp_c1_4000	chr11	8558457
solcap_snp_c2_12276	chr11	8651904
solcap_snp_c1_3996	chr11	8660284
solcap_snp_c2_12265	chr11	8768935
solcap_snp_c2_12252	chr11	8882224
solcap_snp_c2_12297	chr11	9025340
solcap_snp_c1_3999	chr11	9033764
solcap_snp_c2_12263	chr11	9052805
solcap_snp_c1_3993	chr11	9052964
solcap_snp_c1_3992	chr11	9055733
solcap_snp_c2_12259	chr11	9057019
solcap_snp_c2_24318	chr11	9100472
solcap_snp_c2_49294	chr11	9247408
solcap_snp_c2_49318	chr11	9270778
solcap_snp_c2_49317	chr11	9270990
solcap_snp_c2_49316	chr11	9270999
solcap_snp_c2_49315	chr11	9271020
solcap_snp_c2_49313	chr11	9271305
solcap_snp_c2_49312	chr11	9271438
solcap_snp_c2_49311	chr11	9271462
solcap_snp_c2_49310	chr11	9272495
solcap_snp_c2_49309	chr11	9272810
solcap_snp_c2_49306	chr11	9296905
solcap_snp_c2_53676	chr11	9376833
solcap_snp_c2_53677	chr11	9377259
solcap_snp_c2_53678	chr11	9377403
solcap_snp_c2_53680	chr11	9378870
solcap_snp_c2_53681	chr11	9379692
solcap_snp_c2_53682	chr11	9379722
solcap_snp_c2_53683	chr11	9379875
solcap_snp_c2_53684	chr11	9379884
solcap_snp_c2_53685	chr11	9380064
solcap_snp_c1_15655	chr11	9380133
solcap_snp_c1_15656	chr11	9380182
solcap_snp_c1_15657	chr11	9380268
solcap_snp_c1_15658	chr11	9380301
solcap_snp_c2_53687	chr11	9380556
solcap_snp_c2_53696	chr11	9473110
solcap_snp_c2_53273	chr11	9576599
solcap_snp_c2_33002	chr11	9631209
solcap_snp_c2_33000	chr11	9636854
solcap_snp_c2_32994	chr11	9662661
solcap_snp_c2_32989	chr11	9699484
solcap_snp_c2_32981	chr11	9734970
solcap_snp_c2_32977	chr11	9735441
solcap_snp_c2_32976	chr11	9735458
solcap_snp_c2_45474	chr11	10042289
solcap_snp_c2_32954	chr11	10212062
solcap_snp_c2_56633	chr11	10339730
solcap_snp_c2_56632	chr11	10339847
solcap_snp_c2_56631	chr11	10340099
solcap_snp_c2_56630	chr11	10340256
solcap_snp_c2_56629	chr11	10340480
solcap_snp_c2_56628	chr11	10340531
solcap_snp_c2_56627	chr11	10340676
solcap_snp_c2_56626	chr11	10341806
solcap_snp_c2_56624	chr11	10343292
solcap_snp_c2_56623	chr11	10343301
solcap_snp_c2_32339	chr11	10396445
solcap_snp_c2_32341	chr11	10396503
solcap_snp_c2_57106	chr11	10505697
solcap_snp_c2_57107	chr11	10505722
solcap_snp_c2_33905	chr11	10681067
solcap_snp_c2_33914	chr11	10773770
solcap_snp_c2_33917	chr11	10852080
solcap_snp_c2_29148	chr11	11026810
solcap_snp_c2_29096	chr11	11089025
solcap_snp_c2_29113	chr11	11175174
solcap_snp_c2_29141	chr11	11336061
solcap_snp_c2_24589	chr12	147551
solcap_snp_c2_24586	chr12	159673
solcap_snp_c1_7766	chr12	239176
solcap_snp_c2_24565	chr12	243133
solcap_snp_c2_24563	chr12	243727
solcap_snp_c2_24561	chr12	243865
solcap_snp_c2_24558	chr12	244619
solcap_snp_c2_24556	chr12	244664
solcap_snp_c2_24555	chr12	244853
solcap_snp_c2_24552	chr12	244975
solcap_snp_c2_24551	chr12	245004
solcap_snp_c2_24536	chr12	278981
solcap_snp_c2_24535	chr12	279074
solcap_snp_c2_24534	chr12	283159
solcap_snp_c1_7754	chr12	360816
solcap_snp_c2_24466	chr12	441721
solcap_snp_c2_24454	chr12	459353
solcap_snp_c2_24432	chr12	502211
solcap_snp_c1_7744	chr12	530723
solcap_snp_c2_24595	chr12	633377
solcap_snp_c2_54634	chr12	644157
solcap_snp_c1_15641	chr12	823935
solcap_snp_c1_15642	chr12	823953
solcap_snp_c1_8004	chr12	977982
solcap_snp_c2_25362	chr12	1293616
solcap_snp_c2_25372	chr12	1324476
solcap_snp_c2_16238	chr12	1651575
solcap_snp_c2_16204	chr12	1882025
solcap_snp_c2_16200	chr12	1882622
solcap_snp_c2_16182	chr12	1951258
solcap_snp_c2_16170	chr12	1972521
solcap_snp_c2_16169	chr12	1972560
solcap_snp_c2_16156	chr12	2179315
solcap_snp_c1_5198	chr12	2217453
solcap_snp_c2_13645	chr12	2230450
solcap_snp_c2_39741	chr12	2714440
solcap_snp_c1_11730	chr12	2717971
solcap_snp_c2_39765	chr12	2784917
solcap_snp_c2_43774	chr12	3089924
solcap_snp_c1_12895	chr12	3145554
solcap_snp_c2_27926	chr12	3547410
solcap_snp_c2_27928	chr12	3549361
solcap_snp_c2_27929	chr12	3553469
solcap_snp_c2_27930	chr12	3553557
solcap_snp_c2_27960	chr12	3746864
solcap_snp_c2_27961	chr12	3746948
solcap_snp_c2_27962	chr12	3747051
solcap_snp_c2_27963	chr12	3747091
solcap_snp_c1_8631	chr12	3749168
solcap_snp_c1_8632	chr12	3749334
solcap_snp_c1_8635	chr12	3750917
solcap_snp_c2_27970	chr12	3799718
solcap_snp_c1_8641	chr12	3879293
solcap_snp_c2_27992	chr12	3879537
solcap_snp_c2_27993	chr12	3879544
solcap_snp_c2_27994	chr12	3879621
solcap_snp_c2_28006	chr12	3921385
solcap_snp_c2_28007	chr12	3921415
solcap_snp_c2_28008	chr12	3921502
solcap_snp_c1_8642	chr12	3921843
solcap_snp_c2_28012	chr12	3928951
solcap_snp_c1_8646	chr12	4018650
solcap_snp_c2_31337	chr12	4042518
solcap_snp_c2_31336	chr12	4043933
solcap_snp_c2_31301	chr12	4189099
solcap_snp_c2_31290	chr12	4217966
solcap_snp_c2_31247	chr12	4322254
solcap_snp_c2_50983	chr12	4632236
solcap_snp_c2_49199	chr12	4899142
solcap_snp_c2_49201	chr12	4899455
solcap_snp_c2_49203	chr12	4906660
solcap_snp_c2_49206	chr12	4906893
solcap_snp_c2_49209	chr12	4907175
solcap_snp_c1_13762	chr12	5258241
solcap_snp_c2_46299	chr12	5258697
solcap_snp_c1_13767	chr12	5379440
solcap_snp_c2_40699	chr12	6100997
solcap_snp_c2_24654	chr12	6355560
solcap_snp_c2_24650	chr12	6384441
solcap_snp_c2_24645	chr12	6418596
solcap_snp_c2_1536	chr12	6518553
solcap_snp_c2_1542	chr12	6546672
solcap_snp_c1_7770	chr12	6701031
solcap_snp_c2_24646	chr12	6911438
solcap_snp_c2_34776	chr12	7863519
solcap_snp_c2_34777	chr12	7869975
solcap_snp_c2_34789	chr12	7873049
solcap_snp_c2_34807	chr12	8030835
solcap_snp_c2_34762	chr12	8063612
solcap_snp_c2_34780	chr12	8302371
solcap_snp_c2_34803	chr12	8516713
solcap_snp_c2_34806	chr12	8519787
solcap_snp_c2_53931	chr12	8556175
solcap_snp_c2_53924	chr12	8578995
solcap_snp_c2_53918	chr12	8593980
solcap_snp_c2_57680	chr12	9018198
solcap_snp_c2_48890	chr12	9047869
solcap_snp_c2_48900	chr12	9131605
solcap_snp_c2_53244	chr12	9357754
solcap_snp_c2_3191	chr12	9484294
solcap_snp_c2_3185	chr12	9518067
solcap_snp_c2_3255	chr12	9550446
solcap_snp_c2_32120	chr12	9753263
solcap_snp_c2_32437	chr12	10128013
solcap_snp_c1_9646	chr12	10204865
solcap_snp_c2_27379	chr12	10256960
solcap_snp_c2_27387	chr12	10524987
solcap_snp_c2_27390	chr12	10527050
solcap_snp_c2_27397	chr12	10674668
solcap_snp_c2_27398	chr12	10674671
solcap_snp_c2_27414	chr12	10694804
solcap_snp_c2_51460	chr01	151047
solcap_snp_c2_36608	chr01	251132
solcap_snp_c2_36615	chr01	253077
solcap_snp_c2_36658	chr01	269400
solcap_snp_c1_10930	chr01	309342
solcap_snp_c2_36617	chr01	393135
solcap_snp_c2_36629	chr01	433801
solcap_snp_c1_10915	chr01	481295
solcap_snp_c1_10918	chr01	497066
solcap_snp_c2_36660	chr01	534626
solcap_snp_c2_36664	chr01	535454
solcap_snp_c1_10924	chr01	551280
solcap_snp_c2_36668	chr01	559640
solcap_snp_c2_54804	chr01	811699
solcap_snp_c2_54797	chr01	817205
solcap_snp_c2_56714	chr01	931173
solcap_snp_c2_6793	chr01	1314398
solcap_snp_c2_6865	chr01	1513856
solcap_snp_c2_6683	chr01	1828457
solcap_snp_c1_2417	chr01	1838864
solcap_snp_c2_6713	chr01	2068305
solcap_snp_c2_21078	chr01	2497514
solcap_snp_c2_21098	chr01	2589296
solcap_snp_c2_21099	chr01	2591087
solcap_snp_c2_21100	chr01	2591141
solcap_snp_c1_6651	chr01	2605589
solcap_snp_c1_6674	chr01	2822433
solcap_snp_c2_21227	chr01	2951280
solcap_snp_c2_21233	chr01	2956117
solcap_snp_c1_6704	chr01	2957398
solcap_snp_c2_21235	chr01	2958391
solcap_snp_c2_21247	chr01	3087549
solcap_snp_c1_6123	chr01	3296181
solcap_snp_c1_6114	chr01	3693421
solcap_snp_c1_6109	chr01	3716735
solcap_snp_c1_6108	chr01	3716741
solcap_snp_c2_19261	chr01	3921601
solcap_snp_c1_6083	chr01	3953090
solcap_snp_c2_19420	chr01	4013257
solcap_snp_c2_51812	chr01	4258102
solcap_snp_c2_51811	chr01	4258195
solcap_snp_c2_51810	chr01	4258310
solcap_snp_c2_51807	chr01	4258490
solcap_snp_c2_51806	chr01	4262027
solcap_snp_c2_51805	chr01	4262991
solcap_snp_c2_51804	chr01	4263036
solcap_snp_c2_51803	chr01	4263748
solcap_snp_c2_51800	chr01	4277333
solcap_snp_c2_51791	chr01	4309411
solcap_snp_c2_49938	chr01	4598036
solcap_snp_c2_49936	chr01	4603170
solcap_snp_c2_55012	chr01	4954114
solcap_snp_c2_48051	chr01	5079220
solcap_snp_c2_56125	chr01	5291766
solcap_snp_c2_45058	chr01	5347312
solcap_snp_c2_45071	chr01	5386865
solcap_snp_c1_13318	chr01	5431075
solcap_snp_c2_45056	chr01	5477755
solcap_snp_c2_45061	chr01	5498171
solcap_snp_c2_45064	chr01	5502048
solcap_snp_c1_13289	chr01	5505021
solcap_snp_c1_13293	chr01	5505313
solcap_snp_c1_13296	chr01	5523061
solcap_snp_c2_36264	chr03	366332
solcap_snp_c2_36232	chr03	419098
solcap_snp_c2_36231	chr03	419123
solcap_snp_c1_10858	chr03	454269
solcap_snp_c2_36228	chr03	468838
solcap_snp_c2_43470	chr03	659121
solcap_snp_c1_12821	chr03	859369
solcap_snp_c1_12825	chr03	872029
solcap_snp_c2_51390	chr03	982932
solcap_snp_c2_51389	chr03	983008
solcap_snp_c2_54286	chr03	1267563
solcap_snp_c2_54288	chr03	1269875
solcap_snp_c2_54290	chr03	1272794
solcap_snp_c1_15782	chr03	1276837
solcap_snp_c1_15783	chr03	1276863
solcap_snp_c2_52800	chr03	1536781
solcap_snp_c2_52806	chr03	1541622
solcap_snp_c2_52809	chr03	1575045
solcap_snp_c2_52811	chr03	1580212
solcap_snp_c2_52813	chr03	1611409
solcap_snp_c2_52815	chr03	1612323
solcap_snp_c2_17218	chr03	1954563
solcap_snp_c1_15839	chr03	2390429
solcap_snp_c2_50372	chr03	2524231
solcap_snp_c1_14813	chr03	2565354
solcap_snp_c2_16682	chr03	3014439
solcap_snp_c2_16681	chr03	3014454
solcap_snp_c2_16680	chr03	3014625
solcap_snp_c2_16679	chr03	3014691
solcap_snp_c2_16678	chr03	3014811
solcap_snp_c2_16677	chr03	3014826
solcap_snp_c2_16676	chr03	3014973
solcap_snp_c2_16675	chr03	3015066
solcap_snp_c1_5400	chr03	3107887
solcap_snp_c1_5388	chr03	3161621
solcap_snp_c2_16571	chr03	3672939
solcap_snp_c2_16567	chr03	3673234
solcap_snp_c1_13059	chr03	4234685
solcap_snp_c2_44361	chr03	4378373
solcap_snp_c1_13052	chr03	4382671
solcap_snp_c1_12182	chr03	4446760
solcap_snp_c2_52467	chr03	4670814
solcap_snp_c1_15333	chr03	4732420
solcap_snp_c1_8970	chr03	5430309
solcap_snp_c1_8968	chr03	5430430
solcap_snp_c2_29450	chr03	5448586
solcap_snp_c2_29441	chr03	5580430
solcap_snp_c1_8974	chr03	5657114
solcap_snp_c2_50634	chr03	5741725
solcap_snp_c2_23511	chr04	17660
solcap_snp_c1_7574	chr04	117620
solcap_snp_c2_23593	chr04	635886
solcap_snp_c2_23596	chr04	641790
solcap_snp_c2_23600	chr04	656192
solcap_snp_c2_23601	chr04	656429
solcap_snp_c2_23602	chr04	656465
solcap_snp_c2_23603	chr04	658706
solcap_snp_c1_7568	chr04	659638
solcap_snp_c1_7569	chr04	660102
solcap_snp_c1_7570	chr04	663819
solcap_snp_c1_7571	chr04	663858
solcap_snp_c2_23611	chr04	745614
solcap_snp_c2_23619	chr04	769207
solcap_snp_c2_54381	chr04	856999
solcap_snp_c2_54382	chr04	857113
solcap_snp_c2_56990	chr04	1118401
solcap_snp_c2_54463	chr04	1195223
solcap_snp_c2_39322	chr04	1502121
solcap_snp_c2_39285	chr04	1520854
solcap_snp_c2_39282	chr04	1633476
solcap_snp_c2_39287	chr04	1684582
solcap_snp_c1_11626	chr04	1821002
solcap_snp_c1_13859	chr04	2032297
solcap_snp_c1_13860	chr04	2118607
solcap_snp_c1_11243	chr04	2207405
solcap_snp_c1_11242	chr04	2207457
solcap_snp_c2_37633	chr04	2207703
solcap_snp_c2_37631	chr04	2210334
solcap_snp_c2_50942	chr04	2572452
solcap_snp_c1_9084	chr04	2680042
solcap_snp_c2_29872	chr04	2714003
solcap_snp_c2_29828	chr04	2985847
solcap_snp_c2_29851	chr04	3127465
solcap_snp_c2_29850	chr04	3127475
solcap_snp_c1_16358	chr04	3240076
solcap_snp_c2_55065	chr04	3294734
solcap_snp_c1_13626	chr04	3500991
solcap_snp_c2_45927	chr04	3562172
solcap_snp_c2_31673	chr04	3805809
solcap_snp_c2_31688	chr04	3816447
solcap_snp_c2_31712	chr04	3872265
solcap_snp_c2_31713	chr04	3872267
solcap_snp_c2_31719	chr04	3903824
solcap_snp_c2_31720	chr04	3903850
solcap_snp_c1_9546	chr04	3905183
solcap_snp_c2_31732	chr04	3924918
solcap_snp_c2_31733	chr04	3926768
solcap_snp_c2_31734	chr04	3926879
solcap_snp_c2_7757	chr04	4023866
solcap_snp_c1_6898	chr04	4586164
solcap_snp_c2_21937	chr04	4587018
solcap_snp_c2_21934	chr04	4606550
solcap_snp_c2_21930	chr04	4770130
solcap_snp_c2_21915	chr04	4821112
solcap_snp_c1_6890	chr04	4832664
solcap_snp_c2_21896	chr04	4903359
solcap_snp_c2_21867	chr04	4948774
solcap_snp_c2_21847	chr04	5030164
solcap_snp_c2_21842	chr04	5046865
solcap_snp_c2_21914	chr04	5192938
solcap_snp_c2_21858	chr04	5205905
solcap_snp_c2_21839	chr04	5215800
solcap_snp_c1_16079	chr04	5435822
solcap_snp_c1_16080	chr04	5453095
solcap_snp_c2_51637	chr04	5488531
solcap_snp_c2_51638	chr04	5488574
solcap_snp_c2_51639	chr04	5488735
solcap_snp_c2_51641	chr04	5489011
solcap_snp_c1_15106	chr04	5513361
solcap_snp_c2_51647	chr04	5521580
solcap_snp_c2_51650	chr04	5603404
solcap_snp_c1_3740	chr04	6178872
solcap_snp_c1_3722	chr04	6202137
solcap_snp_c2_11571	chr04	6209862
solcap_snp_c2_11570	chr04	6210340
solcap_snp_c2_11569	chr04	6210370
solcap_snp_c2_11568	chr04	6210397
solcap_snp_c2_11564	chr04	6297654
solcap_snp_c2_11549	chr04	6380666
solcap_snp_c2_11534	chr04	6614553
solcap_snp_c1_3707	chr04	6717567
solcap_snp_c2_11491	chr04	6942764
solcap_snp_c2_11490	chr04	6958040
solcap_snp_c2_11489	chr04	6958720
solcap_snp_c2_11488	chr04	6958789
solcap_snp_c2_11487	chr04	6960381
solcap_snp_c2_11479	chr04	6978730
solcap_snp_c2_11435	chr04	7041420
solcap_snp_c2_11432	chr04	7099708
solcap_snp_c2_11427	chr04	7121345
solcap_snp_c2_11425	chr04	7122790
solcap_snp_c2_11516	chr04	7368483
solcap_snp_c2_48873	chr04	7521115
solcap_snp_c2_48871	chr04	7524216
solcap_snp_c2_48868	chr04	7546115
solcap_snp_c2_48867	chr04	7546220
solcap_snp_c2_48866	chr04	7546310
solcap_snp_c2_48864	chr04	7546471
solcap_snp_c2_48861	chr04	7547910
solcap_snp_c2_48854	chr04	7553892
solcap_snp_c2_39718	chr04	7898214
solcap_snp_c1_11723	chr04	7966239
solcap_snp_c1_11722	chr04	7966312
solcap_snp_c1_11709	chr04	8016002
solcap_snp_c1_11710	chr04	8016032
solcap_snp_c2_39606	chr04	8016281
solcap_snp_c2_39624	chr04	8060573
solcap_snp_c2_39590	chr04	8176305
solcap_snp_c2_39593	chr04	8209896
solcap_snp_c2_39594	chr04	8218291
solcap_snp_c2_39597	chr04	8218478
solcap_snp_c2_47320	chr04	8413993
solcap_snp_c2_42863	chr04	8712928
solcap_snp_c1_8353	chr04	9203540
solcap_snp_c1_8341	chr04	9262447
solcap_snp_c2_26771	chr04	9276117
solcap_snp_c2_26773	chr04	9276426
solcap_snp_c1_8344	chr04	9315557
solcap_snp_c2_26790	chr04	9520486
solcap_snp_c2_26791	chr04	9521322
solcap_snp_c2_26792	chr04	9523209
solcap_snp_c1_8346	chr04	9523734
solcap_snp_c1_8347	chr04	9523778
solcap_snp_c1_8348	chr04	9523808
solcap_snp_c2_26793	chr04	9524196
solcap_snp_c2_26794	chr04	9524367
solcap_snp_c2_26795	chr04	9524454
solcap_snp_c2_26796	chr04	9524541
solcap_snp_c2_26797	chr04	9524613
solcap_snp_c2_26800	chr04	9525295
solcap_snp_c2_26801	chr04	9525367
solcap_snp_c2_26802	chr04	9525557
solcap_snp_c2_26811	chr04	9588125
solcap_snp_c2_26812	chr04	9590925
solcap_snp_c2_26813	chr04	9592426
solcap_snp_c2_26814	chr04	9592552
solcap_snp_c2_26826	chr04	9648247
solcap_snp_c2_26832	chr04	9674525
solcap_snp_c2_26842	chr04	9747341
solcap_snp_c2_26843	chr04	9747383
solcap_snp_c2_26844	chr04	9749952
solcap_snp_c1_8354	chr04	9787340
solcap_snp_c2_26858	chr04	9810489
solcap_snp_c2_53784	chr04	9941194
solcap_snp_c2_53779	chr04	9941686
solcap_snp_c2_44601	chr04	10102877
solcap_snp_c2_44609	chr04	10132935
solcap_snp_c1_16258	chr04	10390793
solcap_snp_c2_31403	chr04	10567963
solcap_snp_c2_54077	chr04	10968547
solcap_snp_c2_54083	chr04	10969111
solcap_snp_c2_54090	chr04	10993507
solcap_snp_c1_16643	chr04	11108454
solcap_snp_c1_11135	chr04	11350257
solcap_snp_c2_51176	chr04	11654120
solcap_snp_c2_23776	chr05	65193
solcap_snp_c2_23780	chr05	65287
solcap_snp_c2_23803	chr05	71198
solcap_snp_c2_23804	chr05	71209
solcap_snp_c2_23643	chr05	159426
solcap_snp_c2_23669	chr05	190926
solcap_snp_c2_23678	chr05	224801
solcap_snp_c2_23717	chr05	291556
solcap_snp_c2_23728	chr05	325029
solcap_snp_c2_23729	chr05	325030
solcap_snp_c2_23735	chr05	388873
solcap_snp_c2_23737	chr05	389040
solcap_snp_c2_23738	chr05	389065
solcap_snp_c2_23739	chr05	389174
solcap_snp_c2_23740	chr05	389266
solcap_snp_c2_23741	chr05	389308
solcap_snp_c1_7621	chr05	391001
solcap_snp_c1_7622	chr05	391031
solcap_snp_c2_23743	chr05	391812
solcap_snp_c1_7624	chr05	412134
solcap_snp_c2_23828	chr05	694091
solcap_snp_c2_23829	chr05	694151
solcap_snp_c2_23830	chr05	694286
solcap_snp_c2_23831	chr05	694355
solcap_snp_c2_23832	chr05	694469
solcap_snp_c2_23833	chr05	694521
solcap_snp_c2_23834	chr05	694541
solcap_snp_c2_23835	chr05	694562
solcap_snp_c2_23836	chr05	694653
solcap_snp_c2_23841	chr05	703580
solcap_snp_c2_23842	chr05	705671
solcap_snp_c2_23843	chr05	705734
solcap_snp_c2_23845	chr05	705860
solcap_snp_c2_23846	chr05	727316
solcap_snp_c1_15684	chr05	1041105
solcap_snp_c2_40379	chr05	1091964
solcap_snp_c2_33598	chr05	1245711
solcap_snp_c2_33508	chr05	1400727
solcap_snp_c2_33510	chr05	1401058
solcap_snp_c2_33511	chr05	1401063
solcap_snp_c2_33512	chr05	1401412
solcap_snp_c2_33513	chr05	1401419
solcap_snp_c2_33514	chr05	1408684
solcap_snp_c2_33515	chr05	1411584
solcap_snp_c2_33516	chr05	1413720
solcap_snp_c2_33517	chr05	1413732
solcap_snp_c2_33518	chr05	1413816
solcap_snp_c2_33519	chr05	1413897
solcap_snp_c2_33520	chr05	1413918
solcap_snp_c2_33521	chr05	1413945
solcap_snp_c2_33522	chr05	1414020
solcap_snp_c2_33532	chr05	1425058
solcap_snp_c2_33534	chr05	1437827
solcap_snp_c2_33535	chr05	1437829
solcap_snp_c1_10042	chr05	1438051
solcap_snp_c2_33536	chr05	1438486
solcap_snp_c2_33537	chr05	1438693
solcap_snp_c2_33545	chr05	1505744
solcap_snp_c2_33563	chr05	1596529
solcap_snp_c2_52061	chr05	1832192
solcap_snp_c2_52066	chr05	1847520
solcap_snp_c2_52067	chr05	1847556
solcap_snp_c2_52069	chr05	1847677
solcap_snp_c2_52070	chr05	1853441
solcap_snp_c2_52084	chr05	1902218
solcap_snp_c2_11605	chr05	1957512
solcap_snp_c2_11604	chr05	1957584
solcap_snp_c2_11766	chr05	1996437
solcap_snp_c2_11758	chr05	1997209
solcap_snp_c2_11747	chr05	2037634
solcap_snp_c2_11734	chr05	2078006
solcap_snp_c2_11726	chr05	2079223
solcap_snp_c2_11725	chr05	2079802
solcap_snp_c2_11712	chr05	2149871
solcap_snp_c2_11707	chr05	2214471
solcap_snp_c2_11696	chr05	2261080
solcap_snp_c2_11695	chr05	2261237
solcap_snp_c2_11685	chr05	2288291
solcap_snp_c1_3767	chr05	2781880
solcap_snp_c1_15618	chr05	3051266
solcap_snp_c1_3840	chr05	3134967
solcap_snp_c1_3803	chr05	3585641
solcap_snp_c1_3795	chr05	3702171
solcap_snp_c2_11925	chr05	3708757
solcap_snp_c2_11924	chr05	3708760
solcap_snp_c1_3793	chr05	3709723
solcap_snp_c2_11923	chr05	3710249
solcap_snp_c2_11829	chr05	4041510
solcap_snp_c2_22986	chr05	4279075
solcap_snp_c2_22957	chr05	4418403
solcap_snp_c2_22959	chr05	4434048
solcap_snp_c2_23052	chr05	4906728
solcap_snp_c1_7372	chr05	4921752
solcap_snp_c2_23055	chr05	4936332
solcap_snp_c2_23056	chr05	4936615
solcap_snp_c2_50311	chr05	5039916
solcap_snp_c2_50309	chr05	5050162
solcap_snp_c2_50306	chr05	5051710
solcap_snp_c1_14802	chr05	5051766
solcap_snp_c2_50305	chr05	5052466
solcap_snp_c1_14801	chr05	5053838
solcap_snp_c2_50304	chr05	5055627
solcap_snp_c2_50303	chr05	5055684
solcap_snp_c2_50302	chr05	5055763
solcap_snp_c2_50301	chr05	5055948
solcap_snp_c2_50300	chr05	5055959
solcap_snp_c2_50299	chr05	5056005
solcap_snp_c2_50298	chr05	5056010
solcap_snp_c2_54035	chr05	5368339
solcap_snp_c2_12510	chr05	5506532
solcap_snp_c2_51464	chr05	5533993
solcap_snp_c2_51478	chr05	5573355
solcap_snp_c2_51473	chr05	5574612
solcap_snp_c2_51470	chr05	5574733
solcap_snp_c1_14836	chr05	5683864
solcap_snp_c1_14839	chr05	5692751
solcap_snp_c1_14840	chr05	5692769
solcap_snp_c2_50429	chr05	5692904
solcap_snp_c2_50430	chr05	5692913
solcap_snp_c1_14841	chr05	5693667
solcap_snp_c2_50421	chr05	5791983
solcap_snp_c2_47643	chr05	5919249
solcap_snp_c2_47644	chr05	5920033
solcap_snp_c2_47646	chr05	5921198
solcap_snp_c2_47647	chr05	5926421
solcap_snp_c2_47648	chr05	5932020
solcap_snp_c2_47649	chr05	5932061
solcap_snp_c2_47658	chr05	5945550
solcap_snp_c2_47659	chr05	5946439
solcap_snp_c2_47660	chr05	5946481
solcap_snp_c2_47663	chr05	5946946
solcap_snp_c2_47597	chr05	5952162
solcap_snp_c1_14127	chr05	5967825
solcap_snp_c2_47607	chr05	5972364
solcap_snp_c2_47611	chr05	5972571
solcap_snp_c2_52436	chr05	6147926
solcap_snp_c2_52455	chr05	6204099
solcap_snp_c2_47284	chr05	6354190
solcap_snp_c2_47300	chr05	6395068
solcap_snp_c2_47301	chr05	6395149
solcap_snp_c2_47302	chr05	6397015
solcap_snp_c2_47303	chr05	6397142
solcap_snp_c2_38221	chr05	6497821
solcap_snp_c2_38197	chr05	6567537
solcap_snp_c2_38193	chr05	6583448
solcap_snp_c2_38167	chr05	6625290
solcap_snp_c2_38163	chr05	6626727
solcap_snp_c2_38229	chr05	6772274
solcap_snp_c2_55452	chr05	6965234
solcap_snp_c2_45522	chr05	7200278
solcap_snp_c2_45517	chr05	7332437
solcap_snp_c2_37719	chr05	7675049
solcap_snp_c2_37697	chr05	7717307
solcap_snp_c2_37692	chr05	7741542
solcap_snp_c1_11267	chr05	7832577
solcap_snp_c2_37092	chr05	8024220
solcap_snp_c2_37066	chr05	8139386
solcap_snp_c1_11078	chr05	8166198
solcap_snp_c1_11088	chr05	8360537
solcap_snp_c2_48021	chr05	8660304
solcap_snp_c1_15292	chr05	8795719
solcap_snp_c2_43523	chr05	9134438
solcap_snp_c2_43515	chr05	9144438
solcap_snp_c2_43506	chr05	9147230
solcap_snp_c2_43504	chr05	9147460
solcap_snp_c2_55894	chr05	9558289
solcap_snp_c2_55899	chr05	9639945
solcap_snp_c2_55902	chr05	9640047
solcap_snp_c2_55903	chr05	9640075
solcap_snp_c2_55905	chr05	9640118
solcap_snp_c2_55906	chr05	9640678
solcap_snp_c1_14645	chr05	10031602
solcap_snp_c2_32877	chr05	10273830
solcap_snp_c2_32854	chr05	10418984
solcap_snp_c2_32828	chr05	10543629
solcap_snp_c2_43944	chr06	64155
solcap_snp_c2_43963	chr06	106518
solcap_snp_c1_12922	chr06	141184
solcap_snp_c2_54011	chr06	195511
solcap_snp_c2_54010	chr06	226737
solcap_snp_c1_15726	chr06	238858
solcap_snp_c2_30501	chr06	257821
solcap_snp_c2_30631	chr06	314510
solcap_snp_c2_30632	chr06	314685
solcap_snp_c1_9224	chr06	368267
solcap_snp_c2_30488	chr06	368270
solcap_snp_c2_30492	chr06	396389
solcap_snp_c1_9229	chr06	398132
solcap_snp_c2_30495	chr06	398244
solcap_snp_c2_30508	chr06	410240
solcap_snp_c2_30509	chr06	410471
solcap_snp_c2_30510	chr06	410624
solcap_snp_c2_30511	chr06	411086
solcap_snp_c2_30534	chr06	471273
solcap_snp_c1_9250	chr06	627882
solcap_snp_c2_30596	chr06	764684
solcap_snp_c2_30612	chr06	833354
solcap_snp_c2_36454	chr06	1179882
solcap_snp_c2_36452	chr06	1179971
solcap_snp_c2_36443	chr06	1207075
solcap_snp_c2_36427	chr06	1213731
solcap_snp_c1_10873	chr06	1242783
solcap_snp_c2_36402	chr06	1288686
solcap_snp_c2_36400	chr06	1288828
solcap_snp_c2_36393	chr06	1303853
solcap_snp_c2_36385	chr06	1461571
solcap_snp_c2_36460	chr06	1612506
solcap_snp_c2_36456	chr06	1614261
solcap_snp_c2_36388	chr06	1642570
solcap_snp_c2_36370	chr06	1648043
solcap_snp_c2_53250	chr06	1801624
solcap_snp_c1_13641	chr06	1832292
solcap_snp_c1_13638	chr06	1832894
solcap_snp_c2_45987	chr06	1889144
solcap_snp_c2_45974	chr06	1911161
solcap_snp_c2_45973	chr06	1911169
solcap_snp_c2_45971	chr06	1923484
solcap_snp_c1_13644	chr06	2065804
solcap_snp_c2_46002	chr06	2074295
solcap_snp_c2_55557	chr06	2166162
solcap_snp_c2_55556	chr06	2166517
solcap_snp_c2_55554	chr06	2182273
solcap_snp_c2_55553	chr06	2182330
solcap_snp_c1_16128	chr06	2202825
solcap_snp_c2_57292	chr06	2270608
solcap_snp_c2_57291	chr06	2270659
solcap_snp_c2_38293	chr06	2591073
solcap_snp_c1_11418	chr06	2713822
solcap_snp_c2_38323	chr06	2713850
solcap_snp_c2_38330	chr06	2819027
solcap_snp_c2_27620	chr06	2954516
solcap_snp_c2_27574	chr06	3295487
solcap_snp_c2_27563	chr06	3335960
solcap_snp_c2_27561	chr06	3336148
solcap_snp_c2_27559	chr06	3336388
solcap_snp_c2_27606	chr06	3440844
solcap_snp_c2_27571	chr06	3469120
solcap_snp_c2_27570	chr06	3469522
solcap_snp_c2_27565	chr06	3470372
solcap_snp_c2_27564	chr06	3470384
solcap_snp_c2_27556	chr06	3471762
solcap_snp_c2_3135	chr06	3551683
solcap_snp_c2_3134	chr06	3555939
solcap_snp_c2_3133	chr06	3555942
solcap_snp_c2_3127	chr06	3823781
solcap_snp_c2_3107	chr06	4082786
solcap_snp_c2_3104	chr06	4151533
solcap_snp_c2_3092	chr06	4177003
solcap_snp_c2_3091	chr06	4177195
solcap_snp_c2_3167	chr06	4444482
solcap_snp_c2_3163	chr06	4444971
solcap_snp_c2_3162	chr06	4473040
solcap_snp_c2_3158	chr06	4670128
solcap_snp_c2_56971	chr06	4701224
solcap_snp_c2_56974	chr06	4702155
solcap_snp_c2_3155	chr06	4826262
solcap_snp_c2_3154	chr06	4826898
solcap_snp_c1_925	chr06	4850123
solcap_snp_c2_3152	chr06	4850359
solcap_snp_c2_3146	chr06	5048456
solcap_snp_c2_3145	chr06	5520109
solcap_snp_c2_36712	chr06	5849852
solcap_snp_c2_36711	chr06	5849928
solcap_snp_c2_36710	chr06	5849993
solcap_snp_c2_36709	chr06	5850053
solcap_snp_c1_10935	chr06	5850803
solcap_snp_c1_10934	chr06	5851192
solcap_snp_c2_36708	chr06	5852757
solcap_snp_c1_10932	chr06	5864065
solcap_snp_c2_36706	chr06	5895227
solcap_snp_c1_10938	chr06	6071303
solcap_snp_c1_10939	chr06	6099875
solcap_snp_c2_36721	chr06	6100004
solcap_snp_c2_56259	chr06	6388474
solcap_snp_c2_46993	chr06	6422780
solcap_snp_c2_46994	chr06	6422832
solcap_snp_c2_46995	chr06	6423296
solcap_snp_c2_46997	chr06	6423476
solcap_snp_c2_46998	chr06	6423713
solcap_snp_c2_47002	chr06	6445075
solcap_snp_c1_15462	chr07	205949
solcap_snp_c2_52905	chr07	288431
solcap_snp_c2_46051	chr07	446125
solcap_snp_c2_46081	chr07	539619
solcap_snp_c2_46100	chr07	563935
solcap_snp_c2_46101	chr07	564380
solcap_snp_c1_13663	chr07	564435
solcap_snp_c2_46103	chr07	564582
solcap_snp_c2_46106	chr07	565922
solcap_snp_c2_46107	chr07	565983
solcap_snp_c2_46108	chr07	567059
solcap_snp_c2_46109	chr07	567115
solcap_snp_c1_13671	chr07	568317
solcap_snp_c2_46111	chr07	572574
solcap_snp_c2_46113	chr07	573554
solcap_snp_c1_11534	chr07	583570
solcap_snp_c1_11519	chr07	587048
solcap_snp_c1_11520	chr07	587066
solcap_snp_c1_11521	chr07	588080
solcap_snp_c2_38827	chr07	588083
solcap_snp_c2_38828	chr07	588137
solcap_snp_c1_11523	chr07	588227
solcap_snp_c2_38893	chr07	637024
solcap_snp_c2_38900	chr07	638125
solcap_snp_c1_11525	chr07	769203
solcap_snp_c2_38871	chr07	795288
solcap_snp_c2_38872	chr07	797478
solcap_snp_c2_38873	chr07	797510
solcap_snp_c1_15906	chr07	1002067
solcap_snp_c2_54651	chr07	1002101
solcap_snp_c2_54652	chr07	1002244
solcap_snp_c1_15909	chr07	1002482
solcap_snp_c1_15910	chr07	1002684
solcap_snp_c1_15911	chr07	1002704
solcap_snp_c1_15912	chr07	1005773
solcap_snp_c1_15913	chr07	1005838
solcap_snp_c1_15914	chr07	1005913
solcap_snp_c1_10825	chr07	1081996
solcap_snp_c1_10788	chr07	1279591
solcap_snp_c2_36068	chr07	1279680
solcap_snp_c2_36067	chr07	1282261
solcap_snp_c1_10781	chr07	1318870
solcap_snp_c1_10836	chr07	1352928
solcap_snp_c2_45643	chr07	1947499
solcap_snp_c2_43960	chr07	2300074
solcap_snp_c2_26197	chr07	2498400
solcap_snp_c2_26296	chr07	2531707
solcap_snp_c2_26145	chr07	2584839
solcap_snp_c1_8164	chr07	2592838
solcap_snp_c2_26154	chr07	2593153
solcap_snp_c2_26162	chr07	2596686
solcap_snp_c2_26165	chr07	2609116
solcap_snp_c2_26166	chr07	2609204
solcap_snp_c2_26167	chr07	2610382
solcap_snp_c2_26169	chr07	2639244
solcap_snp_c2_26182	chr07	2671927
solcap_snp_c1_8173	chr07	2932652
solcap_snp_c2_26210	chr07	2932790
solcap_snp_c2_26211	chr07	2932808
solcap_snp_c2_26238	chr07	2972894
solcap_snp_c2_26239	chr07	2972897
solcap_snp_c1_8186	chr07	3246279
solcap_snp_c2_36882	chr07	3314985
solcap_snp_c2_36818	chr07	3476491
solcap_snp_c2_36831	chr07	3505434
solcap_snp_c2_36832	chr07	3505461
solcap_snp_c2_36833	chr07	3505922
solcap_snp_c2_36835	chr07	3507474
solcap_snp_c2_36837	chr07	3508026
solcap_snp_c2_36838	chr07	3508158
solcap_snp_c1_10975	chr07	3509762
solcap_snp_c2_36859	chr07	3579340
solcap_snp_c2_36872	chr07	3633771
solcap_snp_c1_16212	chr07	3891696
solcap_snp_c2_55830	chr07	3891813
solcap_snp_c2_55831	chr07	3892550
solcap_snp_c2_55832	chr07	3892568
solcap_snp_c2_55833	chr07	3892715
solcap_snp_c2_55834	chr07	3892784
solcap_snp_c2_55835	chr07	3892940
solcap_snp_c1_16221	chr07	3894102
solcap_snp_c1_16222	chr07	3894388
solcap_snp_c1_16225	chr07	3896060
solcap_snp_c2_55837	chr07	3896195
solcap_snp_c2_55838	chr07	3896216
solcap_snp_c1_16227	chr07	3896435
solcap_snp_c1_16229	chr07	3897283
solcap_snp_c2_52663	chr07	3949542
solcap_snp_c2_46379	chr07	4100017
solcap_snp_c2_46398	chr07	4193255
solcap_snp_c2_46393	chr07	4231614
solcap_snp_c2_43574	chr07	4403363
solcap_snp_c2_43607	chr07	4530220
solcap_snp_c2_46736	chr07	4601862
solcap_snp_c2_46734	chr07	4602216
solcap_snp_c2_46733	chr07	4602246
solcap_snp_c2_46749	chr07	4834362
solcap_snp_c2_46715	chr07	4870655
solcap_snp_c2_46710	chr07	4874743
solcap_snp_c2_46709	chr07	4874797
solcap_snp_c2_46708	chr07	4874866
solcap_snp_c2_46707	chr07	4874927
solcap_snp_c2_46755	chr07	4880359
solcap_snp_c2_48715	chr07	5260432
solcap_snp_c2_52374	chr07	5791166
solcap_snp_c1_15484	chr07	6367929
solcap_snp_c1_15485	chr07	6420869
solcap_snp_c1_11935	chr07	6466545
solcap_snp_c1_11948	chr07	6519894
solcap_snp_c2_29386	chr07	6666579
solcap_snp_c1_14735	chr07	6706118
solcap_snp_c2_56659	chr07	7049964
solcap_snp_c2_56660	chr07	7054045
solcap_snp_c2_55985	chr07	7105363
solcap_snp_c2_55986	chr07	7105382
solcap_snp_c2_47004	chr07	7139104
solcap_snp_c1_13594	chr07	7426592
solcap_snp_c2_45798	chr07	7480900
solcap_snp_c2_45799	chr07	7480919
solcap_snp_c2_29015	chr08	141850
solcap_snp_c1_8838	chr08	220082
solcap_snp_c2_29020	chr08	285383
solcap_snp_c2_29025	chr08	399666
solcap_snp_c2_29027	chr08	400382
solcap_snp_c2_29043	chr08	494929
solcap_snp_c2_29044	chr08	495071
solcap_snp_c2_29046	chr08	495242
solcap_snp_c2_29047	chr08	495260
solcap_snp_c1_8854	chr08	513465
solcap_snp_c2_29071	chr08	558651
solcap_snp_c2_54456	chr08	625053
solcap_snp_c1_15235	chr08	701676
solcap_snp_c1_9776	chr08	1031440
solcap_snp_c1_9777	chr08	1031548
solcap_snp_c2_32644	chr08	1041970
solcap_snp_c1_9779	chr08	1067135
solcap_snp_c1_9785	chr08	1179922
solcap_snp_c2_32667	chr08	1218944
solcap_snp_c1_9786	chr08	1220894
solcap_snp_c2_32677	chr08	1237709
solcap_snp_c2_32702	chr08	1367551
solcap_snp_c2_32704	chr08	1367651
solcap_snp_c2_32710	chr08	1396675
solcap_snp_c2_51957	chr08	1767949
solcap_snp_c2_51954	chr08	1868572
solcap_snp_c1_8522	chr08	1952169
solcap_snp_c2_27452	chr08	2045972
solcap_snp_c1_8508	chr08	2163605
solcap_snp_c2_27485	chr08	2202542
solcap_snp_c1_8516	chr08	2365709
solcap_snp_c1_8518	chr08	2473819
solcap_snp_c2_53516	chr08	2593796
solcap_snp_c1_15756	chr08	2903601
solcap_snp_c2_54204	chr08	2907179
solcap_snp_c2_24324	chr08	3132680
solcap_snp_c2_24403	chr08	3211341
solcap_snp_c1_7739	chr08	3211419
solcap_snp_c1_7740	chr08	3214920
solcap_snp_c2_24405	chr08	3214989
solcap_snp_c2_24406	chr08	3215934
solcap_snp_c2_24407	chr08	3215967
solcap_snp_c2_24410	chr08	3216285
solcap_snp_c2_50041	chr08	3502674
solcap_snp_c2_44855	chr08	3650168
solcap_snp_c2_57750	chr08	3728282
solcap_snp_c2_57767	chr08	3735546
solcap_snp_c1_10250	chr08	3762133
solcap_snp_c1_10249	chr08	3762134
solcap_snp_c2_34161	chr08	3776559
solcap_snp_c2_34142	chr08	3827691
solcap_snp_c2_34124	chr08	3914208
solcap_snp_c2_34121	chr08	3962323
solcap_snp_c2_34117	chr08	3993593
solcap_snp_c2_34115	chr08	3993755
solcap_snp_c2_34110	chr08	4026312
solcap_snp_c2_34109	chr08	4026338
solcap_snp_c2_34179	chr08	4174544
solcap_snp_c2_34103	chr08	4235737
solcap_snp_c2_19534	chr08	4354484
solcap_snp_c2_52253	chr08	4441556
solcap_snp_c2_30104	chr08	4742020
solcap_snp_c2_30037	chr08	4843008
solcap_snp_c2_30052	chr08	4911088
solcap_snp_c2_30053	chr08	4911152
solcap_snp_c1_9103	chr08	4912192
solcap_snp_c2_30054	chr08	4918755
solcap_snp_c2_30067	chr08	5062018
solcap_snp_c2_30073	chr08	5069311
solcap_snp_c2_48951	chr08	5311941
solcap_snp_c2_48953	chr08	5312058
solcap_snp_c2_26917	chr08	5449092
solcap_snp_c2_26919	chr08	5449109
solcap_snp_c2_26893	chr08	5528114
solcap_snp_c1_8380	chr08	5810262
solcap_snp_c2_26935	chr08	5818629
solcap_snp_c2_26936	chr08	5818668
solcap_snp_c2_26938	chr08	5832912
solcap_snp_c2_49541	chr08	6371823
solcap_snp_c1_13229	chr08	6541246
solcap_snp_c1_13230	chr08	6659364
solcap_snp_c2_3368	chr09	19770
solcap_snp_c2_3363	chr09	53924
solcap_snp_c2_3358	chr09	128612
solcap_snp_c1_1053	chr09	137894
solcap_snp_c1_1052	chr09	161472
solcap_snp_c1_1051	chr09	161493
solcap_snp_c2_3353	chr09	162045
solcap_snp_c2_3323	chr09	197357
solcap_snp_c2_3321	chr09	198490
solcap_snp_c2_3320	chr09	198497
solcap_snp_c2_3318	chr09	198982
solcap_snp_c1_1029	chr09	213976
solcap_snp_c1_1020	chr09	348287
solcap_snp_c2_3305	chr09	375565
solcap_snp_c1_1000	chr09	506457
solcap_snp_c1_988	chr09	544137
solcap_snp_c1_992	chr09	544356
solcap_snp_c1_975	chr09	621941
solcap_snp_c1_14388	chr09	650478
solcap_snp_c1_14393	chr09	739884
solcap_snp_c1_14394	chr09	739893
solcap_snp_c2_48673	chr09	741534
solcap_snp_c2_48597	chr09	778420
solcap_snp_c1_14370	chr09	816857
solcap_snp_c2_39091	chr09	1002798
solcap_snp_c2_39100	chr09	1019975
solcap_snp_c2_55760	chr09	1045199
solcap_snp_c2_39017	chr09	1069265
solcap_snp_c2_39029	chr09	1199754
solcap_snp_c2_39031	chr09	1199847
solcap_snp_c2_39034	chr09	1201082
solcap_snp_c2_39035	chr09	1201163
solcap_snp_c2_39080	chr09	1376364
solcap_snp_c2_39081	chr09	1376399
solcap_snp_c2_39082	chr09	1376493
solcap_snp_c2_39083	chr09	1376511
solcap_snp_c2_39084	chr09	1376541
solcap_snp_c2_39085	chr09	1376784
solcap_snp_c2_39086	chr09	1377161
solcap_snp_c1_11572	chr09	1377914
solcap_snp_c1_3613	chr09	1556721
solcap_snp_c1_3612	chr09	1556742
solcap_snp_c1_3608	chr09	1593214
solcap_snp_c2_11005	chr09	1958822
solcap_snp_c2_10966	chr09	2024826
solcap_snp_c2_10964	chr09	2078743
solcap_snp_c2_10963	chr09	2078799
solcap_snp_c1_3598	chr09	2080285
solcap_snp_c1_3597	chr09	2081425
solcap_snp_c1_3596	chr09	2081488
solcap_snp_c2_10961	chr09	2081790
solcap_snp_c2_10960	chr09	2082519
solcap_snp_c2_10958	chr09	2082817
solcap_snp_c2_10957	chr09	2083602
solcap_snp_c2_10956	chr09	2083608
solcap_snp_c2_10906	chr09	2346064
solcap_snp_c2_11018	chr09	2471232
solcap_snp_c2_10896	chr09	2531544
solcap_snp_c2_39216	chr09	2792921
solcap_snp_c2_32193	chr09	3185825
solcap_snp_c1_9651	chr09	3324451
solcap_snp_c1_9652	chr09	3371136
solcap_snp_c2_4030	chr09	3619115
solcap_snp_c2_4045	chr09	3710627
solcap_snp_c2_4048	chr09	3746470
solcap_snp_c1_1383	chr09	3845879
solcap_snp_c1_1391	chr09	3869878
solcap_snp_c1_1394	chr09	3872079
solcap_snp_c2_4136	chr09	3996413
solcap_snp_c2_4156	chr09	4089445
solcap_snp_c2_4157	chr09	4089607
solcap_snp_c2_4158	chr09	4091032
solcap_snp_c2_4165	chr09	4119060
solcap_snp_c1_1420	chr09	4321053
solcap_snp_c1_1422	chr09	4336697
solcap_snp_c2_4187	chr09	4358664
solcap_snp_c1_1426	chr09	4373995
solcap_snp_c2_4192	chr09	4386691
solcap_snp_c2_3934	chr09	4627549
solcap_snp_c2_3943	chr09	4793025
solcap_snp_c2_3944	chr09	4793164
solcap_snp_c2_3945	chr09	4793207
solcap_snp_c2_3946	chr09	4793350
solcap_snp_c2_3947	chr09	4793361
solcap_snp_c2_3948	chr09	4793518
solcap_snp_c2_3949	chr09	4793719
solcap_snp_c2_3950	chr09	4793758
solcap_snp_c1_1341	chr09	4795129
solcap_snp_c2_3952	chr09	4801569
solcap_snp_c2_3953	chr09	4801715
solcap_snp_c2_3959	chr09	4869974
solcap_snp_c2_3961	chr09	4882347
solcap_snp_c2_3969	chr09	4893114
solcap_snp_c2_3984	chr09	5032856
solcap_snp_c2_3997	chr09	5130873
solcap_snp_c1_10539	chr09	5326794
solcap_snp_c2_35422	chr09	5468629
solcap_snp_c1_10528	chr09	5494877
solcap_snp_c2_35411	chr09	5698900
solcap_snp_c2_52240	chr09	5790641
solcap_snp_c2_52241	chr09	5790649
solcap_snp_c2_13322	chr09	6062798
solcap_snp_c2_13304	chr09	6087560
solcap_snp_c2_13293	chr09	6247447
solcap_snp_c2_13281	chr09	6277743
solcap_snp_c2_13273	chr09	6333199
solcap_snp_c1_4271	chr09	6389488
solcap_snp_c2_13242	chr09	6414137
solcap_snp_c2_13211	chr09	6538771
solcap_snp_c1_4248	chr09	6577412
solcap_snp_c2_13194	chr09	6579975
solcap_snp_c2_13193	chr09	6580364
solcap_snp_c2_13188	chr09	6599502
solcap_snp_c1_4243	chr09	6676330
solcap_snp_c2_13180	chr09	6722333
solcap_snp_c2_13177	chr09	6722540
solcap_snp_c1_4238	chr09	6726820
solcap_snp_c1_4237	chr09	6755187
solcap_snp_c2_13163	chr09	6770427
solcap_snp_c1_4231	chr09	6773424
solcap_snp_c2_13139	chr09	6982644
solcap_snp_c2_13138	chr09	6982649
solcap_snp_c2_13136	chr09	6982808
solcap_snp_c2_13135	chr09	6983029
solcap_snp_c2_13134	chr09	6983042
solcap_snp_c2_13133	chr09	6983058
solcap_snp_c1_4228	chr09	6985383
solcap_snp_c1_4222	chr09	7147029
solcap_snp_c1_4213	chr09	7229870
solcap_snp_c1_4206	chr09	7231325
solcap_snp_c1_4282	chr09	7250032
solcap_snp_c1_15470	chr09	7427636
solcap_snp_c2_50238	chr09	7882786
solcap_snp_c2_50247	chr09	7900964
solcap_snp_c2_52515	chr09	8043110
solcap_snp_c2_52517	chr09	8043250
solcap_snp_c2_52518	chr09	8043289
solcap_snp_c2_52519	chr09	8043361
solcap_snp_c2_52521	chr09	8043736
solcap_snp_c2_52522	chr09	8051081
solcap_snp_c2_52523	chr09	8051126
solcap_snp_c1_15353	chr09	8053533
solcap_snp_c2_52527	chr09	8053879
solcap_snp_c2_54944	chr09	8258573
solcap_snp_c2_46431	chr09	8359750
solcap_snp_c1_13785	chr09	8474261
solcap_snp_c2_4415	chr09	8670291
solcap_snp_c1_1512	chr09	8794822
solcap_snp_c2_54609	chr09	8882591
solcap_snp_c2_54613	chr09	8918435
solcap_snp_c2_31988	chr09	9726696
solcap_snp_c2_31989	chr09	9726822
solcap_snp_c2_31991	chr09	9727038
solcap_snp_c2_56748	chr09	9984749

## Sheet: TableS5b_chromosomal long arm
SolCAP_SNP_ID	chr_v403	position
solcap_snp_c1_11991	chr10	47398435
solcap_snp_c1_16001	chr10	47539878
solcap_snp_c2_57716	chr10	47692764
solcap_snp_c1_15145	chr10	47876626
solcap_snp_c1_13526	chr10	48020996
solcap_snp_c2_45603	chr10	48073593
solcap_snp_c2_45602	chr10	48073693
solcap_snp_c1_13524	chr10	48074905
solcap_snp_c2_45600	chr10	48130882
solcap_snp_c1_13531	chr10	48149384
solcap_snp_c1_13530	chr10	48149399
solcap_snp_c2_45616	chr10	48165825
solcap_snp_c2_45611	chr10	48203431
solcap_snp_c2_45606	chr10	48218826
solcap_snp_c2_25510	chr10	48679881
solcap_snp_c1_16351	chr10	48761642
solcap_snp_c2_25469	chr10	48808653
solcap_snp_c1_8021	chr10	48862950
solcap_snp_c1_8020	chr10	48863048
solcap_snp_c1_8019	chr10	48863165
solcap_snp_c2_55948	chr10	48982352
solcap_snp_c2_57640	chr10	49179309
solcap_snp_c1_11535	chr10	49553136
solcap_snp_c2_38917	chr10	49584775
solcap_snp_c1_11540	chr10	49659510
solcap_snp_c2_53064	chr10	49723063
solcap_snp_c2_54444	chr10	49804809
solcap_snp_c2_54862	chr10	50052280
solcap_snp_c1_15594	chr10	50187264
solcap_snp_c1_15590	chr10	50189383
solcap_snp_c2_27795	chr10	50458044
solcap_snp_c2_27806	chr10	50615253
solcap_snp_c2_27808	chr10	50615474
solcap_snp_c2_27821	chr10	50649574
solcap_snp_c2_27827	chr10	50697563
solcap_snp_c2_27829	chr10	50782097
solcap_snp_c2_27831	chr10	50806407
solcap_snp_c1_9492	chr10	50947502
solcap_snp_c2_31395	chr10	51124055
solcap_snp_c2_52831	chr10	51201613
solcap_snp_c2_45692	chr10	51357104
solcap_snp_c2_45686	chr10	51360322
solcap_snp_c2_51301	chr10	51725970
solcap_snp_c2_3161	chr10	51901246
solcap_snp_c2_53951	chr10	51904076
solcap_snp_c2_53950	chr10	51904140
solcap_snp_c2_53949	chr10	51904174
solcap_snp_c2_53948	chr10	51909193
solcap_snp_c2_53947	chr10	51926657
solcap_snp_c2_53946	chr10	51926832
solcap_snp_c2_53945	chr10	51927288
solcap_snp_c2_53944	chr10	51927510
solcap_snp_c2_53943	chr10	51927945
solcap_snp_c1_15698	chr10	51928032
solcap_snp_c2_51083	chr10	52002272
solcap_snp_c1_15219	chr10	52167709
solcap_snp_c1_15225	chr10	52205182
solcap_snp_c1_15218	chr10	52262224
solcap_snp_c2_51213	chr10	52644299
solcap_snp_c2_51215	chr10	52656103
solcap_snp_c1_14992	chr10	52663730
solcap_snp_c2_51202	chr10	52681270
solcap_snp_c2_57625	chr10	52779195
solcap_snp_c1_10295	chr10	53164109
solcap_snp_c1_10297	chr10	53166656
solcap_snp_c2_55819	chr10	53235977
solcap_snp_c2_37962	chr10	53579668
solcap_snp_c2_37963	chr10	53579712
solcap_snp_c1_11319	chr10	53648500
solcap_snp_c1_10315	chr10	54315048
solcap_snp_c2_54992	chr10	54747212
solcap_snp_c2_54991	chr10	54748703
solcap_snp_c2_15468	chr10	54788083
solcap_snp_c1_4989	chr10	55066144
solcap_snp_c1_4990	chr10	55066508
solcap_snp_c1_4992	chr10	55066939
solcap_snp_c1_5010	chr10	55210592
solcap_snp_c2_15528	chr10	55287524
solcap_snp_c2_15529	chr10	55287582
solcap_snp_c2_15530	chr10	55287654
solcap_snp_c2_15532	chr10	55288267
solcap_snp_c2_15534	chr10	55288472
solcap_snp_c2_15535	chr10	55288566
solcap_snp_c2_15536	chr10	55288580
solcap_snp_c1_5029	chr10	55432134
solcap_snp_c1_5047	chr10	55613000
solcap_snp_c2_15606	chr10	55613286
solcap_snp_c2_48125	chr10	55841755
solcap_snp_c2_48124	chr10	55841759
solcap_snp_c2_48123	chr10	55841834
solcap_snp_c2_48122	chr10	55841848
solcap_snp_c2_48121	chr10	55841859
solcap_snp_c2_48119	chr10	55842163
solcap_snp_c2_48118	chr10	55842215
solcap_snp_c1_14236	chr10	55946697
solcap_snp_c2_48130	chr10	55946835
solcap_snp_c2_48129	chr10	55967994
solcap_snp_c2_48127	chr10	55968104
solcap_snp_c2_48126	chr10	55968638
solcap_snp_c1_9027	chr10	56116729
solcap_snp_c1_9056	chr10	56194480
solcap_snp_c1_9058	chr10	56301672
solcap_snp_c2_29739	chr10	56303368
solcap_snp_c2_29740	chr10	56307421
solcap_snp_c1_9059	chr10	56310011
solcap_snp_c1_9060	chr10	56310959
solcap_snp_c2_29741	chr10	56311171
solcap_snp_c2_29743	chr10	56319774
solcap_snp_c2_29744	chr10	56321357
solcap_snp_c2_29745	chr10	56321366
solcap_snp_c2_29746	chr10	56321459
solcap_snp_c2_29767	chr10	56448463
solcap_snp_c1_12644	chr10	56723338
solcap_snp_c1_12619	chr10	56753834
solcap_snp_c2_44154	chr10	56952965
solcap_snp_c2_44153	chr10	56953207
solcap_snp_c1_12981	chr10	56985771
solcap_snp_c1_7148	chr10	57265122
solcap_snp_c1_7165	chr10	57307068
solcap_snp_c1_7187	chr10	57468777
solcap_snp_c1_7189	chr10	57470207
solcap_snp_c1_7190	chr10	57478874
solcap_snp_c1_7192	chr10	57479655
solcap_snp_c1_7227	chr10	57709979
solcap_snp_c2_22744	chr10	57837250
solcap_snp_c1_14476	chr10	57943558
solcap_snp_c2_49017	chr10	58007367
solcap_snp_c2_49018	chr10	58007394
solcap_snp_c2_48964	chr10	58038788
solcap_snp_c2_55747	chr10	58201039
solcap_snp_c2_45256	chr10	58295890
solcap_snp_c2_45245	chr10	58303739
solcap_snp_c2_45244	chr10	58303769
solcap_snp_c2_45242	chr10	58304153
solcap_snp_c2_45240	chr10	58304255
solcap_snp_c2_45239	chr10	58305601
solcap_snp_c2_28761	chr10	58636715
solcap_snp_c2_28740	chr10	58766569
solcap_snp_c2_28725	chr10	58835264
solcap_snp_c2_28697	chr10	58885773
solcap_snp_c2_28666	chr10	58929210
solcap_snp_c2_28665	chr10	58929821
solcap_snp_c2_28789	chr10	58981028
solcap_snp_c2_28656	chr10	59058248
solcap_snp_c2_41765	chr10	59124920
solcap_snp_c2_41766	chr10	59124963
solcap_snp_c2_41767	chr10	59124966
solcap_snp_c2_41768	chr10	59125021
solcap_snp_c2_41769	chr10	59125072
solcap_snp_c2_41770	chr10	59125158
solcap_snp_c2_41693	chr10	59177759
solcap_snp_c1_12220	chr10	59236087
solcap_snp_c2_41719	chr10	59278779
solcap_snp_c2_41725	chr10	59403328
solcap_snp_c1_12234	chr10	59403404
solcap_snp_c1_12236	chr10	59445183
solcap_snp_c2_41745	chr10	59457825
solcap_snp_c1_13246	chr10	59563905
solcap_snp_c1_13243	chr10	59608971
solcap_snp_c2_45023	chr10	59663750
solcap_snp_c2_55963	chr11	35100322
solcap_snp_c2_46858	chr11	35196029
solcap_snp_c1_4359	chr11	35737669
solcap_snp_c2_13590	chr11	35897668
solcap_snp_c2_13593	chr11	35913857
solcap_snp_c2_13594	chr11	35920167
solcap_snp_c2_13595	chr11	35920197
solcap_snp_c1_4371	chr11	36021604
solcap_snp_c1_4376	chr11	36206930
solcap_snp_c1_4378	chr11	36244998
solcap_snp_c2_13627	chr11	36543908
solcap_snp_c2_13628	chr11	36544050
solcap_snp_c2_13629	chr11	36544088
solcap_snp_c2_13632	chr11	36545905
solcap_snp_c2_13633	chr11	36564532
solcap_snp_c2_13634	chr11	36568680
solcap_snp_c2_13636	chr11	36652714
solcap_snp_c2_56243	chr11	36853907
solcap_snp_c2_56247	chr11	36865542
solcap_snp_c2_45202	chr11	36978437
solcap_snp_c2_45206	chr11	37070060
solcap_snp_c2_51548	chr11	37256594
solcap_snp_c1_15081	chr11	37256991
solcap_snp_c2_51545	chr11	37281577
solcap_snp_c2_51544	chr11	37282351
solcap_snp_c2_55950	chr11	37383831
solcap_snp_c2_55949	chr11	37384713
solcap_snp_c1_16406	chr11	37703616
solcap_snp_c1_14683	chr11	37987969
solcap_snp_c2_49808	chr11	38102798
solcap_snp_c2_49809	chr11	38102880
solcap_snp_c2_49812	chr11	38103972
solcap_snp_c1_4824	chr11	38167649
solcap_snp_c2_14954	chr11	38224373
solcap_snp_c1_4822	chr11	38231783
solcap_snp_c2_14950	chr11	38233102
solcap_snp_c2_14948	chr11	38233533
solcap_snp_c2_14947	chr11	38233677
solcap_snp_c2_14946	chr11	38233939
solcap_snp_c2_54588	chr11	38250069
solcap_snp_c2_14940	chr11	38552271
solcap_snp_c1_15870	chr11	38721181
solcap_snp_c2_3823	chr11	38992151
solcap_snp_c2_3841	chr11	39154586
solcap_snp_c1_1304	chr11	39251823
solcap_snp_c1_1318	chr11	39410461
solcap_snp_c2_3873	chr11	39420222
solcap_snp_c1_1323	chr11	39607245
solcap_snp_c1_1331	chr11	39748931
solcap_snp_c2_3679	chr11	39908842
solcap_snp_c2_3680	chr11	39908878
solcap_snp_c2_3681	chr11	39909176
solcap_snp_c2_3682	chr11	39910324
solcap_snp_c2_3683	chr11	39911606
solcap_snp_c2_3685	chr11	39911746
solcap_snp_c2_3686	chr11	39913375
solcap_snp_c2_3691	chr11	39919251
solcap_snp_c1_1264	chr11	40194139
solcap_snp_c2_56752	chr11	40351232
solcap_snp_c2_3737	chr11	40397444
solcap_snp_c2_3738	chr11	40397592
solcap_snp_c2_3739	chr11	40397730
solcap_snp_c2_3740	chr11	40397745
solcap_snp_c2_3747	chr11	40425326
solcap_snp_c1_1271	chr11	40432650
solcap_snp_c2_3753	chr11	40442399
solcap_snp_c2_3805	chr11	40540427
solcap_snp_c2_22143	chr11	40618236
solcap_snp_c2_22165	chr11	40696334
solcap_snp_c1_6964	chr11	40716591
solcap_snp_c2_22183	chr11	40773965
solcap_snp_c2_22184	chr11	40775587
solcap_snp_c2_22185	chr11	40775590
solcap_snp_c1_6967	chr11	40777221
solcap_snp_c2_22186	chr11	40777303
solcap_snp_c2_22187	chr11	40777537
solcap_snp_c2_22189	chr11	40777853
solcap_snp_c2_22205	chr11	40845905
solcap_snp_c2_22219	chr11	40874444
solcap_snp_c2_15388	chr11	41349992
solcap_snp_c1_4949	chr11	41448481
solcap_snp_c1_4947	chr11	41448860
solcap_snp_c1_4942	chr11	41449440
solcap_snp_c2_15342	chr11	41585438
solcap_snp_c2_15341	chr11	41585498
solcap_snp_c2_15340	chr11	41585621
solcap_snp_c2_15338	chr11	41585846
solcap_snp_c2_15337	chr11	41585906
solcap_snp_c2_15336	chr11	41585984
solcap_snp_c2_15334	chr11	41587492
solcap_snp_c2_15333	chr11	41587582
solcap_snp_c2_15332	chr11	41587659
solcap_snp_c2_15330	chr11	41587831
solcap_snp_c2_15329	chr11	41587850
solcap_snp_c1_4926	chr11	41603249
solcap_snp_c1_4925	chr11	41603306
solcap_snp_c2_15268	chr11	42278941
solcap_snp_c1_9183	chr11	42627957
solcap_snp_c2_30300	chr11	42628539
solcap_snp_c2_30298	chr11	42629930
solcap_snp_c2_30297	chr11	42640229
solcap_snp_c1_9204	chr11	42665808
solcap_snp_c2_39912	chr11	43204115
solcap_snp_c1_11815	chr11	43282911
solcap_snp_c2_31579	chr11	43938034
solcap_snp_c2_43865	chr11	44295451
solcap_snp_c2_43880	chr11	44313651
solcap_snp_c2_43882	chr11	44331661
solcap_snp_c2_43886	chr11	44337734
solcap_snp_c2_43887	chr11	44338305
solcap_snp_c1_12896	chr11	44360143
solcap_snp_c2_43863	chr11	44429072
solcap_snp_c2_51273	chr11	44683272
solcap_snp_c1_14770	chr11	44838813
solcap_snp_c2_34229	chr11	44992714
solcap_snp_c1_10252	chr11	45059903
solcap_snp_c1_10253	chr11	45060118
solcap_snp_c1_10255	chr11	45084755
solcap_snp_c1_10256	chr11	45084773
solcap_snp_c2_34188	chr11	45084991
solcap_snp_c2_34189	chr11	45085202
solcap_snp_c2_34191	chr11	45085309
solcap_snp_c2_34193	chr11	45086032
solcap_snp_c2_34196	chr11	45086240
solcap_snp_c2_34197	chr11	45086408
solcap_snp_c2_34198	chr11	45092064
solcap_snp_c2_34202	chr11	45092243
solcap_snp_c2_34203	chr11	45092249
solcap_snp_c2_34204	chr11	45092525
solcap_snp_c1_10269	chr11	45129508
solcap_snp_c2_17752	chr12	50570348
solcap_snp_c2_43895	chr12	50775031
solcap_snp_c1_14870	chr12	50896643
solcap_snp_c1_14869	chr12	50896655
solcap_snp_c2_18788	chr12	51251244
solcap_snp_c2_18791	chr12	51258447
solcap_snp_c2_18816	chr12	51560863
solcap_snp_c2_18822	chr12	51561780
solcap_snp_c1_16588	chr12	51615529
solcap_snp_c2_18825	chr12	51732789
solcap_snp_c2_18827	chr12	51817147
solcap_snp_c2_18829	chr12	51851533
solcap_snp_c2_18836	chr12	51862256
solcap_snp_c2_18838	chr12	51885239
solcap_snp_c2_18842	chr12	51886194
solcap_snp_c2_18848	chr12	51908158
solcap_snp_c2_18855	chr12	51931824
solcap_snp_c2_52568	chr12	51963149
solcap_snp_c2_52567	chr12	51963155
solcap_snp_c2_42328	chr12	52418813
solcap_snp_c1_12406	chr12	52568003
solcap_snp_c2_53324	chr12	52790251
solcap_snp_c2_57478	chr12	52956364
solcap_snp_c2_23337	chr12	53037279
solcap_snp_c2_23320	chr12	53052450
solcap_snp_c2_23308	chr12	53190167
solcap_snp_c2_23303	chr12	53192770
solcap_snp_c2_23284	chr12	53304636
solcap_snp_c2_23250	chr12	53642804
solcap_snp_c2_23235	chr12	53690152
solcap_snp_c2_23259	chr12	53792521
solcap_snp_c2_23258	chr12	53792603
solcap_snp_c2_23257	chr12	53792656
solcap_snp_c2_23256	chr12	53792920
solcap_snp_c2_23255	chr12	53793312
solcap_snp_c2_23252	chr12	53793673
solcap_snp_c2_23251	chr12	53793893
solcap_snp_c2_23239	chr12	53797808
solcap_snp_c2_39374	chr12	54019332
solcap_snp_c1_11644	chr12	54173482
solcap_snp_c1_11668	chr12	54234293
solcap_snp_c2_39411	chr12	54234641
solcap_snp_c2_39409	chr12	54234744
solcap_snp_c2_39407	chr12	54234811
solcap_snp_c2_39393	chr12	54259896
solcap_snp_c2_39392	chr12	54259898
solcap_snp_c2_50821	chr12	54426391
solcap_snp_c1_14928	chr12	54471757
solcap_snp_c2_50824	chr12	54479773
solcap_snp_c2_50816	chr12	54542074
solcap_snp_c2_48482	chr12	54727908
solcap_snp_c2_48483	chr12	54727971
solcap_snp_c2_48470	chr12	54861282
solcap_snp_c2_57400	chr12	55091253
solcap_snp_c2_57399	chr12	55091259
solcap_snp_c2_57398	chr12	55092128
solcap_snp_c2_32517	chr12	55185429
solcap_snp_c2_32519	chr12	55185507
solcap_snp_c2_32522	chr12	55185750
solcap_snp_c2_32466	chr12	55216911
solcap_snp_c2_32467	chr12	55220113
solcap_snp_c2_32482	chr12	55312422
solcap_snp_c2_32498	chr12	55411765
solcap_snp_c2_32505	chr12	55428946
solcap_snp_c2_32509	chr12	55550439
solcap_snp_c2_32082	chr12	55723634
solcap_snp_c2_32077	chr12	55762243
solcap_snp_c1_2352	chr12	55861912
solcap_snp_c2_6386	chr12	56024978
solcap_snp_c1_2350	chr12	56454935
solcap_snp_c2_6487	chr12	56571580
solcap_snp_c1_2366	chr12	56641178
solcap_snp_c1_2331	chr12	56876911
solcap_snp_c1_2333	chr12	56878727
solcap_snp_c2_7902	chr12	57128447
solcap_snp_c2_7915	chr12	57275631
solcap_snp_c2_7916	chr12	57275703
solcap_snp_c2_7917	chr12	57275739
solcap_snp_c2_7958	chr12	57468123
solcap_snp_c1_2727	chr12	57468357
solcap_snp_c2_7988	chr12	57597588
solcap_snp_c2_7995	chr12	57611789
solcap_snp_c2_8037	chr12	57705706
solcap_snp_c1_2689	chr12	58047342
solcap_snp_c1_2702	chr12	58127872
solcap_snp_c2_7860	chr12	58194482
solcap_snp_c1_15889	chr12	58824667
solcap_snp_c2_54628	chr12	58825720
solcap_snp_c1_13698	chr12	58983259
solcap_snp_c2_46213	chr12	59129520
solcap_snp_c1_13697	chr12	59132286
solcap_snp_c1_14582	chr12	59271203
solcap_snp_c1_1954	chr12	59371505
solcap_snp_c2_5386	chr12	59451291
solcap_snp_c2_5356	chr12	59566196
solcap_snp_c1_1948	chr12	59631381
solcap_snp_c1_1944	chr12	59760444
solcap_snp_c1_1923	chr12	59870038
solcap_snp_c2_5307	chr12	59872236
solcap_snp_c2_5713	chr12	59957346
solcap_snp_c2_5608	chr12	60243937
solcap_snp_c2_5595	chr12	60305946
solcap_snp_c2_5594	chr12	60306388
solcap_snp_c1_1985	chr12	60307321
solcap_snp_c2_5507	chr12	60477931
solcap_snp_c2_5463	chr12	60753284
solcap_snp_c2_5461	chr12	60754698
solcap_snp_c2_5446	chr12	60809422
solcap_snp_c1_1959	chr12	60814804
solcap_snp_c2_5443	chr12	60816800
solcap_snp_c1_2009	chr12	61027001
solcap_snp_c2_5574	chr12	61050602
solcap_snp_c2_5524	chr12	61060537
solcap_snp_c2_5440	chr12	61086761
solcap_snp_c1_16129	chr12	61141829
solcap_snp_c1_16131	chr12	61148389
solcap_snp_c2_46523	chr01	59974049
solcap_snp_c2_46522	chr01	59974287
solcap_snp_c2_46521	chr01	59974382
solcap_snp_c2_46520	chr01	59974416
solcap_snp_c2_53347	chr01	60027044
solcap_snp_c2_35483	chr01	60240569
solcap_snp_c2_35480	chr01	60259084
solcap_snp_c2_35518	chr01	60512580
solcap_snp_c2_35520	chr01	60513299
solcap_snp_c2_35536	chr01	60515967
solcap_snp_c2_35537	chr01	60516974
solcap_snp_c2_43926	chr01	60887937
solcap_snp_c2_56267	chr01	60919390
solcap_snp_c2_20798	chr01	60951473
solcap_snp_c2_20799	chr01	60951506
solcap_snp_c2_20803	chr01	60987055
solcap_snp_c2_20890	chr01	61310905
solcap_snp_c2_20895	chr01	61326558
solcap_snp_c2_38428	chr01	62058760
solcap_snp_c2_38406	chr01	62145016
solcap_snp_c2_38405	chr01	62145049
solcap_snp_c2_38404	chr01	62148278
solcap_snp_c2_38448	chr01	62289376
solcap_snp_c1_12118	chr01	62612685
solcap_snp_c1_12106	chr01	62802774
solcap_snp_c1_12114	chr01	62851452
solcap_snp_c2_41335	chr01	62930839
solcap_snp_c2_41336	chr01	62930860
solcap_snp_c2_41337	chr01	62930893
solcap_snp_c2_41339	chr01	62931376
solcap_snp_c1_12131	chr01	62935879
solcap_snp_c2_32367	chr01	63183063
solcap_snp_c2_32359	chr01	63208319
solcap_snp_c1_9679	chr01	63338127
solcap_snp_c1_9676	chr01	63469625
solcap_snp_c2_40956	chr01	63724828
solcap_snp_c2_40954	chr01	63756796
solcap_snp_c2_40955	chr01	63874694
solcap_snp_c1_13686	chr01	64120888
solcap_snp_c2_46195	chr01	64259758
solcap_snp_c2_13751	chr01	64614014
solcap_snp_c2_13671	chr01	65062749
solcap_snp_c2_13653	chr01	65270050
solcap_snp_c2_13650	chr01	65277443
solcap_snp_c1_4744	chr01	65472778
solcap_snp_c2_14467	chr01	65694481
solcap_snp_c2_14468	chr01	65694528
solcap_snp_c2_14470	chr01	65696918
solcap_snp_c1_4706	chr01	65779952
solcap_snp_c2_14487	chr01	65780961
solcap_snp_c2_14489	chr01	65782007
solcap_snp_c2_14491	chr01	65782411
solcap_snp_c2_14492	chr01	65782472
solcap_snp_c2_14493	chr01	65782960
solcap_snp_c2_14495	chr01	65783163
solcap_snp_c1_4745	chr01	66093982
solcap_snp_c2_14580	chr01	66218939
solcap_snp_c1_4748	chr01	66259225
solcap_snp_c2_14589	chr01	66283056
solcap_snp_c1_4752	chr01	66336497
solcap_snp_c2_14608	chr01	66349597
solcap_snp_c2_14609	chr01	66349636
solcap_snp_c1_4757	chr01	66354337
solcap_snp_c1_4763	chr01	66376215
solcap_snp_c2_14616	chr01	66427942
solcap_snp_c2_14623	chr01	66431307
solcap_snp_c2_37575	chr01	66552387
solcap_snp_c1_5150	chr01	66675618
solcap_snp_c2_16039	chr01	66723137
solcap_snp_c1_5145	chr01	66903971
solcap_snp_c2_20569	chr01	67013319
solcap_snp_c1_6485	chr01	67136074
solcap_snp_c2_20500	chr01	67211029
solcap_snp_c2_20501	chr01	67211502
solcap_snp_c2_20502	chr01	67221911
solcap_snp_c2_20505	chr01	67223465
solcap_snp_c2_20506	chr01	67223718
solcap_snp_c2_20507	chr01	67223836
solcap_snp_c2_20508	chr01	67224536
solcap_snp_c2_20513	chr01	67277817
solcap_snp_c2_20514	chr01	67277826
solcap_snp_c2_20517	chr01	67279544
solcap_snp_c2_20521	chr01	67293176
solcap_snp_c2_20522	chr01	67294103
solcap_snp_c1_6501	chr01	67459462
solcap_snp_c1_6518	chr01	67605501
solcap_snp_c1_6521	chr01	67735399
solcap_snp_c2_13766	chr01	67896790
solcap_snp_c2_52492	chr01	67969608
solcap_snp_c2_13758	chr01	67996863
solcap_snp_c2_52484	chr01	68069876
solcap_snp_c1_15340	chr01	68127604
solcap_snp_c1_14588	chr01	68350967
solcap_snp_c2_49476	chr01	68412973
solcap_snp_c2_49451	chr01	68416246
solcap_snp_c1_14044	chr01	68529707
solcap_snp_c2_51055	chr01	68950390
solcap_snp_c2_51057	chr01	68950624
solcap_snp_c1_11769	chr01	69200171
solcap_snp_c2_39834	chr01	69381132
solcap_snp_c2_17592	chr01	69809843
solcap_snp_c2_17529	chr01	69902011
solcap_snp_c1_5759	chr01	69917893
solcap_snp_c2_17530	chr01	69918804
solcap_snp_c2_17531	chr01	70016241
solcap_snp_c2_17537	chr01	70097516
solcap_snp_c2_17539	chr01	70223686
solcap_snp_c1_15579	chr01	70341065
solcap_snp_c1_15580	chr01	70341095
solcap_snp_c2_53380	chr01	70371898
solcap_snp_c2_53381	chr01	70372129
solcap_snp_c2_17193	chr01	70472380
solcap_snp_c2_17192	chr01	70472766
solcap_snp_c2_17191	chr01	70474651
solcap_snp_c1_5657	chr01	70560219
solcap_snp_c1_5656	chr01	70562984
solcap_snp_c1_5653	chr01	70697501
solcap_snp_c1_3860	chr01	71009588
solcap_snp_c1_3844	chr01	71088529
solcap_snp_c2_12076	chr01	71090764
solcap_snp_c1_3867	chr01	71239398
solcap_snp_c1_3868	chr01	71239659
solcap_snp_c1_3876	chr01	71278355
solcap_snp_c2_12106	chr01	71298295
solcap_snp_c1_3894	chr01	71421420
solcap_snp_c1_3895	chr01	71444070
solcap_snp_c2_12123	chr01	71450058
solcap_snp_c2_12125	chr01	71450400
solcap_snp_c2_12126	chr01	71450692
solcap_snp_c2_12167	chr01	71807851
solcap_snp_c2_12215	chr01	72051338
solcap_snp_c2_12216	chr01	72051529
solcap_snp_c2_12217	chr01	72051556
solcap_snp_c1_3848	chr01	72108318
solcap_snp_c1_3850	chr01	72111134
solcap_snp_c1_3851	chr01	72111964
solcap_snp_c1_3852	chr01	72111974
solcap_snp_c1_3853	chr01	72112445
solcap_snp_c1_3854	chr01	72112573
solcap_snp_c1_9565	chr01	72320461
solcap_snp_c1_9573	chr01	72504467
solcap_snp_c2_31820	chr01	72528571
solcap_snp_c2_31821	chr01	72531363
solcap_snp_c1_9583	chr01	72540500
solcap_snp_c1_9587	chr01	72540975
solcap_snp_c2_19956	chr01	72742546
solcap_snp_c1_6294	chr01	73340313
solcap_snp_c1_14089	chr01	73706321
solcap_snp_c2_14274	chr01	74061521
solcap_snp_c1_4595	chr01	74193922
solcap_snp_c1_4604	chr01	74257861
solcap_snp_c1_4615	chr01	74352528
solcap_snp_c1_4617	chr01	74355334
solcap_snp_c1_4622	chr01	74360132
solcap_snp_c2_14350	chr01	74628218
solcap_snp_c2_14365	chr01	74688162
solcap_snp_c2_14366	chr01	74688218
solcap_snp_c1_4666	chr01	74741574
solcap_snp_c1_5254	chr01	75045959
solcap_snp_c1_5295	chr01	75079617
solcap_snp_c2_16369	chr01	75163958
solcap_snp_c1_5267	chr01	75333653
solcap_snp_c1_5281	chr01	75442012
solcap_snp_c1_5286	chr01	75477670
solcap_snp_c1_5287	chr01	75477673
solcap_snp_c2_16424	chr01	75478358
solcap_snp_c2_16425	chr01	75485176
solcap_snp_c2_16426	chr01	75485233
solcap_snp_c2_16466	chr01	75748919
solcap_snp_c1_5346	chr01	75789812
solcap_snp_c2_58375	chr01	76242413
solcap_snp_c2_2509	chr01	76406645
solcap_snp_c1_573	chr01	76465282
solcap_snp_c2_2291	chr01	76480545
solcap_snp_c1_594	chr01	76480694
solcap_snp_c2_2307	chr01	76486675
solcap_snp_c1_636	chr01	76505319
solcap_snp_c1_641	chr01	76511247
solcap_snp_c1_683	chr01	76615839
solcap_snp_c2_2400	chr01	76920170
solcap_snp_c2_2420	chr01	76952905
solcap_snp_c2_2421	chr01	76957665
solcap_snp_c2_2423	chr01	76958577
solcap_snp_c2_2424	chr01	76960016
solcap_snp_c2_2426	chr01	76960196
solcap_snp_c2_2427	chr01	76960244
solcap_snp_c2_2463	chr01	77190763
solcap_snp_c2_2464	chr01	77190791
solcap_snp_c2_2465	chr01	77191340
solcap_snp_c2_2466	chr01	77191350
solcap_snp_c1_711	chr01	77207561
solcap_snp_c2_2505	chr01	77350877
solcap_snp_c2_2506	chr01	77351069
solcap_snp_c2_2507	chr01	77351135
solcap_snp_c2_2508	chr01	77353150
solcap_snp_c1_730	chr01	77353237
solcap_snp_c1_737	chr01	77401317
solcap_snp_c2_2551	chr01	77488165
solcap_snp_c1_758	chr01	77526828
solcap_snp_c2_2571	chr01	77596089
solcap_snp_c2_2186	chr01	77652861
solcap_snp_c2_2201	chr01	77738822
solcap_snp_c1_590	chr01	78142002
solcap_snp_c1_607	chr01	78176186
solcap_snp_c2_2299	chr01	78192298
solcap_snp_c2_2354	chr01	78430645
solcap_snp_c2_2384	chr01	78663168
solcap_snp_c2_50486	chr01	78756700
solcap_snp_c2_50485	chr01	78756913
solcap_snp_c2_50483	chr01	78757227
solcap_snp_c2_50502	chr01	78809481
solcap_snp_c1_15872	chr01	78928270
solcap_snp_c2_7007	chr01	79083750
solcap_snp_c1_2459	chr01	79083994
solcap_snp_c1_2484	chr01	79157411
solcap_snp_c2_7094	chr01	79186993
solcap_snp_c2_7192	chr01	79391736
solcap_snp_c2_7193	chr01	79391898
solcap_snp_c2_7208	chr01	79456101
solcap_snp_c1_2519	chr01	79487269
solcap_snp_c1_2520	chr01	79487385
solcap_snp_c2_7223	chr01	79510775
solcap_snp_c2_7241	chr01	79678700
solcap_snp_c2_7242	chr01	79678961
solcap_snp_c2_7245	chr01	79679333
solcap_snp_c2_7246	chr01	79679819
solcap_snp_c2_7248	chr01	79679995
solcap_snp_c1_2531	chr01	79711229
solcap_snp_c1_2535	chr01	79784789
solcap_snp_c2_7328	chr01	79955869
solcap_snp_c2_6990	chr01	80077322
solcap_snp_c1_2458	chr01	80121257
solcap_snp_c2_7053	chr01	80228612
solcap_snp_c2_7054	chr01	80229782
solcap_snp_c2_7055	chr01	80229851
solcap_snp_c2_7056	chr01	80229923
solcap_snp_c2_7059	chr01	80230402
solcap_snp_c2_7061	chr01	80230721
solcap_snp_c1_1853	chr01	80429024
solcap_snp_c1_1847	chr01	80524241
solcap_snp_c2_5091	chr01	80559077
solcap_snp_c1_1838	chr01	80560392
solcap_snp_c1_1837	chr01	80561111
solcap_snp_c2_5078	chr01	80591939
solcap_snp_c2_5077	chr01	80592092
solcap_snp_c2_5039	chr01	80669302
solcap_snp_c2_9728	chr01	80833304
solcap_snp_c2_9727	chr01	80833454
solcap_snp_c2_9726	chr01	80833655
solcap_snp_c1_3227	chr01	80834539
solcap_snp_c2_9722	chr01	80835981
solcap_snp_c2_9988	chr01	81013179
solcap_snp_c2_9925	chr01	81410256
solcap_snp_c2_9908	chr01	81464383
solcap_snp_c2_9892	chr01	81567297
solcap_snp_c2_9864	chr01	81615781
solcap_snp_c1_3275	chr01	81750427
solcap_snp_c1_3273	chr01	81750832
solcap_snp_c1_3255	chr01	81795435
solcap_snp_c1_3241	chr01	81924913
solcap_snp_c1_3234	chr01	81927446
solcap_snp_c1_3199	chr01	81936802
solcap_snp_c1_3292	chr01	81971208
solcap_snp_c2_9744	chr01	82026244
solcap_snp_c1_15123	chr01	82424459
solcap_snp_c2_4896	chr01	82629061
solcap_snp_c2_4754	chr01	82787205
solcap_snp_c2_4798	chr01	82927826
solcap_snp_c2_4799	chr01	82927841
solcap_snp_c1_1638	chr01	82935946
solcap_snp_c1_1645	chr01	82954172
solcap_snp_c1_1653	chr01	83012088
solcap_snp_c1_1683	chr01	83059266
solcap_snp_c1_1684	chr01	83059316
solcap_snp_c2_4844	chr01	83060566
solcap_snp_c2_4845	chr01	83060620
solcap_snp_c2_4860	chr01	83130290
solcap_snp_c2_4864	chr01	83138255
solcap_snp_c2_4875	chr01	83177518
solcap_snp_c2_4884	chr01	83187094
solcap_snp_c2_4885	chr01	83187100
solcap_snp_c2_4898	chr01	83283673
solcap_snp_c2_4904	chr01	83416455
solcap_snp_c2_4905	chr01	83416555
solcap_snp_c2_4906	chr01	83416662
solcap_snp_c2_4907	chr01	83418674
solcap_snp_c2_4908	chr01	83419031
solcap_snp_c2_4910	chr01	83419440
solcap_snp_c2_4920	chr01	83488954
solcap_snp_c1_1739	chr01	83608525
solcap_snp_c2_4614	chr01	83843357
solcap_snp_c1_1591	chr01	84026698
solcap_snp_c2_4664	chr01	84062794
solcap_snp_c2_4665	chr01	84062807
solcap_snp_c2_4702	chr01	84208108
solcap_snp_c2_4705	chr01	84214190
solcap_snp_c2_4706	chr01	84214236
solcap_snp_c2_4707	chr01	84214331
solcap_snp_c2_4708	chr01	84214593
solcap_snp_c2_4709	chr01	84214632
solcap_snp_c2_4710	chr01	84214717
solcap_snp_c2_4713	chr01	84217773
solcap_snp_c2_4715	chr01	84219154
solcap_snp_c2_36571	chr01	84398766
solcap_snp_c2_36577	chr01	84401586
solcap_snp_c2_36579	chr01	84405463
solcap_snp_c2_36495	chr01	84457106
solcap_snp_c2_36537	chr01	84596689
solcap_snp_c2_34548	chr01	84727196
solcap_snp_c2_34547	chr01	84727244
solcap_snp_c2_34546	chr01	84728052
solcap_snp_c1_10358	chr01	84900698
solcap_snp_c1_10354	chr01	84979169
solcap_snp_c2_34478	chr01	85047878
solcap_snp_c1_22	chr01	85243930
solcap_snp_c1_23	chr01	85244059
solcap_snp_c2_24	chr01	85323395
solcap_snp_c2_42	chr01	85466533
solcap_snp_c2_46442	chr01	85499588
solcap_snp_c2_46451	chr01	85544623
solcap_snp_c2_46455	chr01	85545111
solcap_snp_c2_46439	chr01	85660794
solcap_snp_c2_13385	chr01	85715615
solcap_snp_c2_46448	chr01	85760205
solcap_snp_c2_53077	chr01	85897859
solcap_snp_c2_53075	chr01	85902599
solcap_snp_c2_42943	chr01	85953453
solcap_snp_c2_49925	chr01	86088641
solcap_snp_c2_49918	chr01	86090282
solcap_snp_c2_49917	chr01	86090388
solcap_snp_c2_49914	chr01	86090567
solcap_snp_c2_49911	chr01	86095563
solcap_snp_c2_49910	chr01	86095990
solcap_snp_c2_49906	chr01	86153316
solcap_snp_c2_49905	chr01	86153327
solcap_snp_c2_49897	chr01	86164613
solcap_snp_c1_4800	chr01	86251604
solcap_snp_c2_14792	chr01	86305614
solcap_snp_c2_14794	chr01	86305814
solcap_snp_c2_14839	chr01	86328884
solcap_snp_c2_14703	chr01	86354960
solcap_snp_c2_14704	chr01	86355044
solcap_snp_c2_14706	chr01	86355281
solcap_snp_c2_14707	chr01	86355313
solcap_snp_c2_14708	chr01	86356334
solcap_snp_c2_14709	chr01	86356478
solcap_snp_c1_4796	chr01	86387941
solcap_snp_c2_14730	chr01	86441457
solcap_snp_c2_14731	chr01	86442644
solcap_snp_c2_14733	chr01	86527570
solcap_snp_c2_14740	chr01	86598470
solcap_snp_c2_14741	chr01	86602967
solcap_snp_c1_4799	chr01	86663670
solcap_snp_c2_14760	chr01	86745999
solcap_snp_c2_14761	chr01	86750211
solcap_snp_c2_14762	chr01	86750499
solcap_snp_c2_14763	chr01	86847460
solcap_snp_c2_14764	chr01	86847564
solcap_snp_c2_14765	chr01	86847570
solcap_snp_c2_14766	chr01	86847750
solcap_snp_c2_14767	chr01	86848639
solcap_snp_c2_14772	chr01	86877878
solcap_snp_c2_14779	chr01	86887703
solcap_snp_c1_4803	chr01	86942383
solcap_snp_c2_14809	chr01	87030691
solcap_snp_c2_14827	chr01	87096729
solcap_snp_c2_14838	chr01	87161066
solcap_snp_c2_14840	chr01	87161681
solcap_snp_c2_14841	chr01	87161795
solcap_snp_c2_14843	chr01	87180917
solcap_snp_c2_14848	chr01	87196723
solcap_snp_c2_14903	chr01	87322718
solcap_snp_c2_37836	chr01	87392925
solcap_snp_c2_37820	chr01	87463611
solcap_snp_c1_11288	chr01	87558284
solcap_snp_c2_37794	chr01	87600773
solcap_snp_c1_11308	chr01	87663628
solcap_snp_c2_37830	chr01	87731582
solcap_snp_c2_37850	chr01	87731694
solcap_snp_c2_37872	chr01	87733935
solcap_snp_c2_37816	chr01	87746117
solcap_snp_c1_11290	chr01	87749782
solcap_snp_c1_9428	chr01	87944567
solcap_snp_c1_9430	chr01	87965133
solcap_snp_c2_31041	chr01	87973310
solcap_snp_c2_31042	chr01	87982085
solcap_snp_c1_9434	chr01	88022361
solcap_snp_c2_22105	chr01	88057276
solcap_snp_c2_54344	chr01	88127428
solcap_snp_c2_56309	chr01	88173638
solcap_snp_c1_9413	chr01	88294149
solcap_snp_c1_9411	chr01	88294281
solcap_snp_c2_30973	chr01	88322772
solcap_snp_c1_9406	chr01	88347389
solcap_snp_c2_30963	chr01	88362869
solcap_snp_c2_30961	chr01	88389559
solcap_snp_c1_9397	chr01	88409494
solcap_snp_c1_9392	chr01	88434918
solcap_snp_c2_30960	chr01	88451543
solcap_snp_c2_30959	chr01	88451740
solcap_snp_c2_30958	chr01	88451745
solcap_snp_c2_30957	chr01	88451789
solcap_snp_c2_30956	chr01	88451932
solcap_snp_c2_30955	chr01	88452136
solcap_snp_c1_9386	chr01	88471573
solcap_snp_c2_31066	chr01	88535784
solcap_snp_c1_9385	chr01	88583876
solcap_snp_c1_9120	chr02	18883765
solcap_snp_c2_30156	chr02	19537381
solcap_snp_c2_30157	chr02	19537424
solcap_snp_c2_30158	chr02	19537468
solcap_snp_c2_30160	chr02	19538764
solcap_snp_c2_30162	chr02	19538859
solcap_snp_c2_30164	chr02	19580609
solcap_snp_c2_30171	chr02	19605917
solcap_snp_c2_47765	chr02	19874372
solcap_snp_c1_14142	chr02	19911208
solcap_snp_c2_55863	chr02	19963833
solcap_snp_c2_47760	chr02	20034673
solcap_snp_c2_17387	chr02	20193466
solcap_snp_c2_17400	chr02	20235232
solcap_snp_c1_16708	chr02	20355744
solcap_snp_c1_5732	chr02	20476838
solcap_snp_c2_17415	chr02	20497672
solcap_snp_c2_17424	chr02	20681182
solcap_snp_c2_17427	chr02	20681291
solcap_snp_c2_17428	chr02	20681320
solcap_snp_c1_5739	chr02	20681610
solcap_snp_c1_5740	chr02	20681658
solcap_snp_c1_5750	chr02	20767146
solcap_snp_c1_5751	chr02	20802070
solcap_snp_c2_17480	chr02	20828121
solcap_snp_c2_17494	chr02	20848347
solcap_snp_c2_40336	chr02	21205475
solcap_snp_c1_16286	chr02	21518196
solcap_snp_c1_11344	chr02	21725617
solcap_snp_c2_38007	chr02	21868107
solcap_snp_c2_38022	chr02	22006899
solcap_snp_c2_32381	chr02	22393286
solcap_snp_c1_9691	chr02	22417546
solcap_snp_c2_32400	chr02	22419484
solcap_snp_c2_32406	chr02	22501415
solcap_snp_c1_9695	chr02	22600527
solcap_snp_c2_32413	chr02	22601132
solcap_snp_c2_32415	chr02	22602148
solcap_snp_c2_32417	chr02	22604793
solcap_snp_c2_32421	chr02	22621454
solcap_snp_c1_9701	chr02	22672560
solcap_snp_c2_32440	chr02	22737101
solcap_snp_c1_9717	chr02	22749216
solcap_snp_c1_9719	chr02	22749459
solcap_snp_c1_9724	chr02	22749951
solcap_snp_c1_9728	chr02	22751697
solcap_snp_c2_50885	chr02	22810921
solcap_snp_c2_50878	chr02	22849535
solcap_snp_c2_57247	chr02	23360573
solcap_snp_c2_39705	chr02	23426000
solcap_snp_c2_39671	chr02	23504101
solcap_snp_c2_39677	chr02	23550242
solcap_snp_c1_11124	chr02	23690363
solcap_snp_c2_37254	chr02	23798841
solcap_snp_c1_11122	chr02	23799702
solcap_snp_c1_11120	chr02	23799767
solcap_snp_c2_37248	chr02	23800477
solcap_snp_c2_37245	chr02	23983466
solcap_snp_c2_33996	chr02	24149038
solcap_snp_c2_33993	chr02	24184641
solcap_snp_c2_53818	chr02	24744980
solcap_snp_c2_52630	chr02	24910452
solcap_snp_c2_21759	chr02	25003703
solcap_snp_c2_21752	chr02	25050263
solcap_snp_c1_6841	chr02	25051954
solcap_snp_c2_21746	chr02	25072603
solcap_snp_c2_21732	chr02	25305517
solcap_snp_c2_21722	chr02	25322260
solcap_snp_c2_21721	chr02	25322287
solcap_snp_c2_21717	chr02	25423284
solcap_snp_c2_21682	chr02	25478266
solcap_snp_c2_21661	chr02	25508015
solcap_snp_c1_6825	chr02	25514625
solcap_snp_c2_21655	chr02	25560351
solcap_snp_c2_21646	chr02	25564066
solcap_snp_c1_6816	chr02	25612912
solcap_snp_c2_21745	chr02	25726378
solcap_snp_c1_16021	chr02	25838557
solcap_snp_c1_11499	chr02	25936033
solcap_snp_c1_11498	chr02	25936087
solcap_snp_c1_11495	chr02	25936297
solcap_snp_c2_38704	chr02	26025648
solcap_snp_c1_11491	chr02	26158341
solcap_snp_c2_38721	chr02	26199529
solcap_snp_c1_11494	chr02	26262335
solcap_snp_c1_9356	chr02	26744045
solcap_snp_c1_9363	chr02	26771646
solcap_snp_c1_9369	chr02	26799085
solcap_snp_c2_56640	chr02	26939177
solcap_snp_c2_45307	chr02	27086672
solcap_snp_c2_45308	chr02	27086756
solcap_snp_c2_45310	chr02	27088040
solcap_snp_c2_45311	chr02	27088240
solcap_snp_c2_45316	chr02	27097448
solcap_snp_c2_45319	chr02	27097616
solcap_snp_c2_45322	chr02	27099641
solcap_snp_c2_45323	chr02	27099743
solcap_snp_c1_13459	chr02	27143975
solcap_snp_c1_13465	chr02	27190087
solcap_snp_c2_54094	chr02	27290595
solcap_snp_c1_12320	chr02	27375174
solcap_snp_c1_12339	chr02	27411239
solcap_snp_c1_12345	chr02	27412222
solcap_snp_c1_12354	chr02	27419948
solcap_snp_c1_12305	chr02	27459050
solcap_snp_c2_41963	chr02	27511649
solcap_snp_c1_12310	chr02	27553265
solcap_snp_c2_41980	chr02	27557527
solcap_snp_c1_12330	chr02	27618698
solcap_snp_c2_42059	chr02	27676733
solcap_snp_c2_42060	chr02	27679089
solcap_snp_c2_38942	chr02	27856828
solcap_snp_c2_38941	chr02	27856858
solcap_snp_c2_38940	chr02	27856861
solcap_snp_c2_38939	chr02	27856921
solcap_snp_c1_11554	chr02	27857415
solcap_snp_c1_11553	chr02	27857419
solcap_snp_c2_38938	chr02	27859923
solcap_snp_c2_38936	chr02	27860001
solcap_snp_c2_38932	chr02	27880249
solcap_snp_c1_11546	chr02	27982556
solcap_snp_c1_11544	chr02	27982808
solcap_snp_c1_11556	chr02	28040094
solcap_snp_c2_52135	chr02	28112404
solcap_snp_c1_15213	chr02	28147347
solcap_snp_c2_38952	chr02	28230212
solcap_snp_c1_13769	chr02	28505685
solcap_snp_c2_19692	chr02	28746087
solcap_snp_c1_5091	chr02	28831038
solcap_snp_c1_5088	chr02	28832309
solcap_snp_c2_15749	chr02	28938773
solcap_snp_c2_48239	chr02	29093511
solcap_snp_c2_48238	chr02	29093735
solcap_snp_c2_48237	chr02	29093850
solcap_snp_c1_14280	chr02	29135932
solcap_snp_c2_48198	chr02	29136168
solcap_snp_c2_48195	chr02	29136866
solcap_snp_c2_48194	chr02	29136948
solcap_snp_c1_14293	chr02	29163404
solcap_snp_c2_39155	chr02	29312995
solcap_snp_c2_51115	chr02	29665296
solcap_snp_c1_13912	chr02	29883619
solcap_snp_c2_46903	chr02	29922614
solcap_snp_c2_46904	chr02	29922863
solcap_snp_c2_46906	chr02	29922924
solcap_snp_c1_13929	chr02	29929027
solcap_snp_c2_46908	chr02	29929772
solcap_snp_c2_46909	chr02	29930069
solcap_snp_c1_13910	chr02	29990972
solcap_snp_c1_13911	chr02	30022358
solcap_snp_c2_46885	chr02	30044642
solcap_snp_c2_46887	chr02	30044782
solcap_snp_c2_46898	chr02	30147347
solcap_snp_c2_57789	chr02	30266494
solcap_snp_c1_7469	chr02	30364307
solcap_snp_c1_7412	chr02	30401430
solcap_snp_c1_7430	chr02	30480670
solcap_snp_c2_23139	chr02	30534382
solcap_snp_c2_23169	chr02	30785582
solcap_snp_c2_23170	chr02	30785663
solcap_snp_c2_23188	chr02	31021346
solcap_snp_c2_23192	chr02	31060140
solcap_snp_c2_41495	chr02	31447986
solcap_snp_c1_12169	chr02	31520933
solcap_snp_c2_41534	chr02	31571293
solcap_snp_c2_41541	chr02	31590970
solcap_snp_c1_13236	chr02	31663285
solcap_snp_c1_13233	chr02	31714404
solcap_snp_c2_44982	chr02	31885152
solcap_snp_c2_39191	chr02	32084808
solcap_snp_c2_39178	chr02	32148414
solcap_snp_c2_39175	chr02	32166954
solcap_snp_c1_11581	chr02	32220107
solcap_snp_c1_13887	chr02	32451482
solcap_snp_c2_44774	chr02	32668601
solcap_snp_c1_13187	chr02	32669719
solcap_snp_c2_44776	chr02	32669950
solcap_snp_c2_44777	chr02	32670900
solcap_snp_c2_44778	chr02	32671197
solcap_snp_c2_44768	chr02	32806337
solcap_snp_c2_44769	chr02	32820618
solcap_snp_c2_44770	chr02	32822982
solcap_snp_c2_13051	chr02	33076297
solcap_snp_c2_13035	chr02	33106169
solcap_snp_c1_4192	chr02	33204519
solcap_snp_c2_51995	chr02	33266694
solcap_snp_c2_51998	chr02	33270568
solcap_snp_c1_15178	chr02	33276009
solcap_snp_c2_52011	chr02	33339084
solcap_snp_c2_51985	chr02	33352128
solcap_snp_c2_51990	chr02	33357550
solcap_snp_c2_48784	chr02	33668270
solcap_snp_c2_47037	chr02	33978983
solcap_snp_c1_12287	chr02	34078475
solcap_snp_c1_12264	chr02	34171906
solcap_snp_c1_12257	chr02	34211649
solcap_snp_c1_12251	chr02	34237017
solcap_snp_c2_33108	chr02	34739125
solcap_snp_c1_11892	chr02	34928666
solcap_snp_c2_40155	chr02	35112246
solcap_snp_c2_40168	chr02	35183801
solcap_snp_c2_40172	chr02	35186396
solcap_snp_c2_50570	chr02	35399277
solcap_snp_c2_55199	chr02	35523028
solcap_snp_c2_50394	chr02	35549497
solcap_snp_c2_50391	chr02	35579208
solcap_snp_c2_50412	chr02	35600642
solcap_snp_c2_50405	chr02	35657856
solcap_snp_c2_27433	chr02	35990827
solcap_snp_c2_17973	chr02	36229830
solcap_snp_c2_17954	chr02	36329310
solcap_snp_c2_17938	chr02	36364447
solcap_snp_c2_17937	chr02	36364535
solcap_snp_c2_17935	chr02	36364709
solcap_snp_c2_17934	chr02	36364714
solcap_snp_c2_17932	chr02	36364867
solcap_snp_c2_17930	chr02	36365001
solcap_snp_c2_17926	chr02	36365601
solcap_snp_c2_17922	chr02	36374698
solcap_snp_c2_17921	chr02	36375306
solcap_snp_c2_17914	chr02	36422460
solcap_snp_c2_17901	chr02	36455029
solcap_snp_c2_17900	chr02	36455167
solcap_snp_c2_17899	chr02	36455254
solcap_snp_c2_17897	chr02	36455671
solcap_snp_c2_17896	chr02	36455707
solcap_snp_c2_17895	chr02	36455917
solcap_snp_c2_17858	chr02	36599213
solcap_snp_c2_17816	chr02	36728587
solcap_snp_c2_17809	chr02	36799197
solcap_snp_c1_5837	chr02	36837559
solcap_snp_c1_5881	chr02	36868741
solcap_snp_c1_5846	chr02	36959331
solcap_snp_c1_5845	chr02	36959334
solcap_snp_c2_49495	chr02	37017928
solcap_snp_c1_12377	chr02	37341815
solcap_snp_c2_42244	chr02	37369714
solcap_snp_c1_12386	chr02	37411847
solcap_snp_c2_42172	chr02	37439083
solcap_snp_c1_16170	chr02	37474663
solcap_snp_c2_55632	chr02	37474756
solcap_snp_c1_16171	chr02	37474969
solcap_snp_c1_16172	chr02	37475092
solcap_snp_c1_12373	chr02	37530501
solcap_snp_c1_12375	chr02	37530951
solcap_snp_c1_12382	chr02	37654538
solcap_snp_c2_42241	chr02	37676152
solcap_snp_c2_35212	chr02	37830883
solcap_snp_c2_35210	chr02	37831871
solcap_snp_c1_10494	chr02	37846065
solcap_snp_c1_10493	chr02	37890365
solcap_snp_c1_10492	chr02	37890658
solcap_snp_c1_10491	chr02	37903454
solcap_snp_c2_35165	chr02	37982843
solcap_snp_c2_35139	chr02	38046786
solcap_snp_c1_10471	chr02	38103808
solcap_snp_c2_35113	chr02	38121256
solcap_snp_c2_35147	chr02	38230143
solcap_snp_c1_15466	chr02	38386350
solcap_snp_c2_40610	chr02	38654150
solcap_snp_c2_53037	chr02	38688212
solcap_snp_c2_53036	chr02	38688295
solcap_snp_c2_53035	chr02	38688398
solcap_snp_c2_53034	chr02	38688454
solcap_snp_c2_53033	chr02	38688568
solcap_snp_c1_15481	chr02	38689941
solcap_snp_c1_11955	chr02	38837610
solcap_snp_c1_11972	chr02	39062507
solcap_snp_c2_40635	chr02	39073504
solcap_snp_c2_40636	chr02	39073567
solcap_snp_c2_40637	chr02	39073604
solcap_snp_c2_40638	chr02	39073798
solcap_snp_c2_42132	chr02	39144889
solcap_snp_c2_42133	chr02	39144899
solcap_snp_c2_42126	chr02	39369211
solcap_snp_c2_42127	chr02	39369313
solcap_snp_c2_42128	chr02	39369457
solcap_snp_c2_42129	chr02	39369471
solcap_snp_c2_42130	chr02	39370219
solcap_snp_c2_25766	chr02	39593338
solcap_snp_c1_8091	chr02	39718023
solcap_snp_c1_8113	chr02	39934251
solcap_snp_c1_8118	chr02	39940755
solcap_snp_c1_8125	chr02	39969910
solcap_snp_c1_8127	chr02	40053236
solcap_snp_c2_25896	chr02	40132479
solcap_snp_c2_25897	chr02	40132605
solcap_snp_c2_25179	chr02	40294533
solcap_snp_c1_7964	chr02	40295082
solcap_snp_c1_7963	chr02	40295371
solcap_snp_c1_7915	chr02	40767958
solcap_snp_c1_7912	chr02	40804323
solcap_snp_c1_7957	chr02	40896280
solcap_snp_c2_7501	chr02	40989011
solcap_snp_c2_7506	chr02	41047745
solcap_snp_c2_7529	chr02	41088098
solcap_snp_c2_7549	chr02	41348074
solcap_snp_c2_7555	chr02	41356869
solcap_snp_c2_7556	chr02	41356967
solcap_snp_c2_7557	chr02	41356974
solcap_snp_c2_7558	chr02	41357618
solcap_snp_c2_7559	chr02	41357648
solcap_snp_c2_7560	chr02	41359045
solcap_snp_c2_7565	chr02	41368249
solcap_snp_c2_7632	chr02	41637559
solcap_snp_c1_2632	chr02	41745346
solcap_snp_c1_2640	chr02	41814861
solcap_snp_c1_2641	chr02	41814873
solcap_snp_c1_2653	chr02	41904235
solcap_snp_c1_2656	chr02	41911252
solcap_snp_c1_2657	chr02	41911264
solcap_snp_c1_2658	chr02	41911481
solcap_snp_c1_2574	chr02	42014714
solcap_snp_c2_7401	chr02	42082955
solcap_snp_c2_7424	chr02	42178921
solcap_snp_c1_2587	chr02	42179952
solcap_snp_c2_7426	chr02	42180125
solcap_snp_c1_16542	chr02	42320744
solcap_snp_c2_57421	chr02	42320746
solcap_snp_c1_16540	chr02	42320752
solcap_snp_c1_15746	chr02	42346319
solcap_snp_c2_22939	chr02	42474431
solcap_snp_c2_22919	chr02	42536778
solcap_snp_c1_7346	chr02	42597150
solcap_snp_c1_7342	chr02	42645671
solcap_snp_c1_7341	chr02	42657363
solcap_snp_c2_22894	chr02	42660643
solcap_snp_c2_22853	chr02	42733475
solcap_snp_c1_7325	chr02	42764457
solcap_snp_c1_7281	chr02	43112392
solcap_snp_c2_27216	chr02	43804889
solcap_snp_c2_27218	chr02	43809958
solcap_snp_c2_27372	chr02	44159208
solcap_snp_c2_27268	chr02	44458190
solcap_snp_c2_27269	chr02	44458217
solcap_snp_c2_27270	chr02	44458261
solcap_snp_c2_27271	chr02	44458744
solcap_snp_c2_43350	chr02	44773246
solcap_snp_c2_43348	chr02	44773405
solcap_snp_c1_12771	chr02	44810486
solcap_snp_c2_43408	chr02	44944694
solcap_snp_c1_12509	chr02	45147257
solcap_snp_c2_42570	chr02	45147540
solcap_snp_c2_14980	chr02	45458636
solcap_snp_c2_14981	chr02	45458750
solcap_snp_c1_4826	chr02	45458975
solcap_snp_c2_14985	chr02	45460986
solcap_snp_c2_14989	chr02	45461381
solcap_snp_c1_4847	chr02	45616777
solcap_snp_c2_15018	chr02	45618397
solcap_snp_c2_15021	chr02	45618817
solcap_snp_c1_4849	chr02	45619058
solcap_snp_c1_4850	chr02	45619076
solcap_snp_c2_15040	chr02	45649739
solcap_snp_c2_15042	chr02	45652453
solcap_snp_c2_15043	chr02	45652583
solcap_snp_c2_15044	chr02	45652664
solcap_snp_c2_15045	chr02	45652812
solcap_snp_c2_15046	chr02	45652911
solcap_snp_c2_15047	chr02	45652977
solcap_snp_c2_15065	chr02	45694416
solcap_snp_c1_4860	chr02	45695531
solcap_snp_c2_15066	chr02	45695537
solcap_snp_c2_15067	chr02	45695588
solcap_snp_c2_15070	chr02	45695772
solcap_snp_c1_4873	chr02	45744472
solcap_snp_c1_4881	chr02	45756358
solcap_snp_c1_7873	chr02	46195190
solcap_snp_c1_7872	chr02	46195203
solcap_snp_c1_7871	chr02	46195322
solcap_snp_c1_7869	chr02	46195418
solcap_snp_c1_7867	chr02	46196337
solcap_snp_c1_7848	chr02	46291602
solcap_snp_c2_24869	chr02	46387242
solcap_snp_c2_47227	chr02	46986482
solcap_snp_c2_47163	chr02	47119850
solcap_snp_c2_47196	chr02	47137398
solcap_snp_c2_47199	chr02	47137638
solcap_snp_c2_47202	chr02	47142731
solcap_snp_c2_35810	chr02	47223807
solcap_snp_c2_35686	chr02	47324048
solcap_snp_c2_35689	chr02	47324246
solcap_snp_c2_35690	chr02	47324335
solcap_snp_c2_35691	chr02	47324387
solcap_snp_c2_35693	chr02	47325275
solcap_snp_c2_35694	chr02	47325484
solcap_snp_c2_35695	chr02	47325502
solcap_snp_c2_35697	chr02	47325613
solcap_snp_c2_35698	chr02	47326485
solcap_snp_c2_35700	chr02	47326606
solcap_snp_c2_35701	chr02	47327434
solcap_snp_c2_35702	chr02	47327523
solcap_snp_c2_35704	chr02	47327530
solcap_snp_c2_35705	chr02	47327646
solcap_snp_c1_11458	chr02	47625735
solcap_snp_c1_11459	chr02	47625747
solcap_snp_c2_38552	chr02	47627484
solcap_snp_c2_38553	chr02	47627520
solcap_snp_c2_38555	chr02	47627703
solcap_snp_c1_5924	chr02	47712488
solcap_snp_c1_5909	chr02	47995095
solcap_snp_c1_5908	chr02	47995191
solcap_snp_c1_5931	chr02	48498156
solcap_snp_c2_36463	chr03	38085008
solcap_snp_c2_36466	chr03	38141607
solcap_snp_c2_36468	chr03	38153740
solcap_snp_c2_36469	chr03	38175099
solcap_snp_c1_10879	chr03	38177443
solcap_snp_c1_10885	chr03	38315031
solcap_snp_c1_11350	chr03	38435099
solcap_snp_c2_38047	chr03	38662974
solcap_snp_c2_38058	chr03	38756280
solcap_snp_c2_38068	chr03	38758796
solcap_snp_c2_48381	chr03	39198462
solcap_snp_c2_48378	chr03	39198646
solcap_snp_c1_14316	chr03	39221780
solcap_snp_c2_48372	chr03	39255217
solcap_snp_c2_48370	chr03	39255317
solcap_snp_c2_48369	chr03	39257162
solcap_snp_c2_48368	chr03	39257271
solcap_snp_c2_48367	chr03	39257352
solcap_snp_c2_48366	chr03	39257411
solcap_snp_c2_48365	chr03	39257459
solcap_snp_c2_48364	chr03	39257577
solcap_snp_c2_48363	chr03	39257702
solcap_snp_c1_14315	chr03	39258166
solcap_snp_c2_48362	chr03	39258512
solcap_snp_c2_48360	chr03	39259017
solcap_snp_c2_48359	chr03	39259070
solcap_snp_c2_48390	chr03	39312768
solcap_snp_c2_48389	chr03	39312775
solcap_snp_c2_48388	chr03	39313859
solcap_snp_c2_48386	chr03	39314332
solcap_snp_c2_48385	chr03	39314387
solcap_snp_c2_57010	chr03	39584588
solcap_snp_c2_37993	chr03	40024360
solcap_snp_c2_38004	chr03	40102342
solcap_snp_c1_16679	chr03	40197844
solcap_snp_c1_11339	chr03	40339071
solcap_snp_c2_42306	chr03	41324382
solcap_snp_c2_16746	chr03	41496608
solcap_snp_c2_42312	chr03	41530089
solcap_snp_c2_24983	chr03	41645779
solcap_snp_c1_7882	chr03	41651732
solcap_snp_c2_57360	chr03	41778945
solcap_snp_c2_57354	chr03	41779526
solcap_snp_c2_57349	chr03	41780626
solcap_snp_c1_6869	chr03	41992129
solcap_snp_c1_6875	chr03	41994529
solcap_snp_c1_6851	chr03	42057000
solcap_snp_c1_6853	chr03	42154551
solcap_snp_c1_6864	chr03	42289087
solcap_snp_c1_9153	chr03	42943917
solcap_snp_c1_9161	chr03	43024161
solcap_snp_c2_46592	chr03	43224595
solcap_snp_c2_45698	chr03	43326301
solcap_snp_c2_45699	chr03	43326576
solcap_snp_c2_45700	chr03	43326700
solcap_snp_c2_45701	chr03	43326802
solcap_snp_c2_45702	chr03	43326959
solcap_snp_c2_45703	chr03	43326982
solcap_snp_c1_13847	chr03	43465296
solcap_snp_c1_13843	chr03	43469293
solcap_snp_c2_46605	chr03	43497910
solcap_snp_c2_46604	chr03	43497970
solcap_snp_c2_46603	chr03	43498325
solcap_snp_c1_4444	chr03	43602976
solcap_snp_c2_13821	chr03	43631694
solcap_snp_c2_13825	chr03	43632258
solcap_snp_c2_13798	chr03	43859960
solcap_snp_c2_17581	chr03	44090353
solcap_snp_c2_17552	chr03	44178120
solcap_snp_c1_5766	chr03	44217284
solcap_snp_c2_20347	chr03	44336061
solcap_snp_c1_6348	chr03	44344381
solcap_snp_c1_16094	chr03	44510670
solcap_snp_c2_55471	chr03	44512686
solcap_snp_c2_55465	chr03	44517478
solcap_snp_c1_6349	chr03	44675684
solcap_snp_c1_6352	chr03	44751875
solcap_snp_c1_6355	chr03	44752567
solcap_snp_c2_20333	chr03	44828352
solcap_snp_c1_6398	chr03	45002749
solcap_snp_c1_6411	chr03	45061263
solcap_snp_c1_6425	chr03	45121807
solcap_snp_c2_20433	chr03	45302180
solcap_snp_c2_55276	chr03	45385967
solcap_snp_c2_55277	chr03	45385984
solcap_snp_c2_55278	chr03	45386022
solcap_snp_c2_55279	chr03	45386107
solcap_snp_c2_55280	chr03	45386311
solcap_snp_c2_55283	chr03	45388663
solcap_snp_c2_55285	chr03	45388939
solcap_snp_c1_8069	chr03	45478753
solcap_snp_c2_25654	chr03	45603662
solcap_snp_c2_25653	chr03	45603698
solcap_snp_c1_8058	chr03	45686495
solcap_snp_c1_8036	chr03	45805462
solcap_snp_c2_25560	chr03	45904981
solcap_snp_c2_25662	chr03	45979293
solcap_snp_c2_2137	chr03	46265419
solcap_snp_c2_2138	chr03	46265431
solcap_snp_c1_526	chr03	46395963
solcap_snp_c2_57860	chr03	46423001
solcap_snp_c2_57863	chr03	46423284
solcap_snp_c2_57864	chr03	46423292
solcap_snp_c2_57865	chr03	46423346
solcap_snp_c1_3638	chr03	46475259
solcap_snp_c1_3637	chr03	46475610
solcap_snp_c2_11224	chr03	46481324
solcap_snp_c1_9025	chr03	46923611
solcap_snp_c1_9014	chr03	47073242
solcap_snp_c2_29646	chr03	47075794
solcap_snp_c2_29645	chr03	47075795
solcap_snp_c2_29643	chr03	47076266
solcap_snp_c2_29639	chr03	47076714
solcap_snp_c2_54785	chr03	47137231
solcap_snp_c1_8998	chr03	47331243
solcap_snp_c2_29678	chr03	47553804
solcap_snp_c2_45914	chr03	47769763
solcap_snp_c2_53699	chr03	48017163
solcap_snp_c2_55072	chr03	48087983
solcap_snp_c2_20069	chr03	48471111
solcap_snp_c2_20077	chr03	48482692
solcap_snp_c2_20113	chr03	48729670
solcap_snp_c2_20117	chr03	48737479
solcap_snp_c2_20124	chr03	48747525
solcap_snp_c2_20170	chr03	48911771
solcap_snp_c2_20175	chr03	48939759
solcap_snp_c2_20176	chr03	48939821
solcap_snp_c2_20178	chr03	48943709
solcap_snp_c2_20179	chr03	48943944
solcap_snp_c2_20227	chr03	49231930
solcap_snp_c1_6332	chr03	49245954
solcap_snp_c2_20259	chr03	49317882
solcap_snp_c2_20273	chr03	49358645
solcap_snp_c2_20274	chr03	49358697
solcap_snp_c2_20282	chr03	49393157
solcap_snp_c2_20283	chr03	49393263
solcap_snp_c2_20284	chr03	49393264
solcap_snp_c2_20285	chr03	49393382
solcap_snp_c2_20286	chr03	49393415
solcap_snp_c1_5774	chr03	49941568
solcap_snp_c2_58296	chr03	50294881
solcap_snp_c2_1616	chr03	50350319
solcap_snp_c2_1579	chr03	50455611
solcap_snp_c2_1567	chr03	50490035
solcap_snp_c2_1560	chr03	50564010
solcap_snp_c2_1556	chr03	50573479
solcap_snp_c2_1545	chr03	50637438
solcap_snp_c1_378	chr03	50686715
solcap_snp_c2_1533	chr03	50688268
solcap_snp_c1_432	chr03	51038140
solcap_snp_c2_1835	chr03	51091650
solcap_snp_c2_1813	chr03	51282166
solcap_snp_c2_1724	chr03	51404231
solcap_snp_c2_1723	chr03	51404258
solcap_snp_c2_1722	chr03	51404309
solcap_snp_c2_1720	chr03	51404520
solcap_snp_c2_1719	chr03	51404549
solcap_snp_c2_1718	chr03	51404622
solcap_snp_c2_1688	chr03	51474620
solcap_snp_c1_398	chr03	51601574
solcap_snp_c2_1844	chr03	51723928
solcap_snp_c2_47583	chr03	51936288
solcap_snp_c2_47510	chr03	51972224
solcap_snp_c1_4504	chr03	52406152
solcap_snp_c1_4509	chr03	52406533
solcap_snp_c2_13987	chr03	52483910
solcap_snp_c1_4519	chr03	52486441
solcap_snp_c2_14017	chr03	52546341
solcap_snp_c1_4542	chr03	52584809
solcap_snp_c2_14064	chr03	52657949
solcap_snp_c2_14155	chr03	52909720
solcap_snp_c1_4576	chr03	53162415
solcap_snp_c1_4577	chr03	53162686
solcap_snp_c2_14258	chr03	53203226
solcap_snp_c2_17649	chr03	53227603
solcap_snp_c2_17648	chr03	53227622
solcap_snp_c2_17646	chr03	53228507
solcap_snp_c2_17644	chr03	53228558
solcap_snp_c1_16234	chr03	53270167
solcap_snp_c2_55882	chr03	53272697
solcap_snp_c2_55885	chr03	53279728
solcap_snp_c2_17631	chr03	53309062
solcap_snp_c1_5794	chr03	53314079
solcap_snp_c2_57259	chr03	53421860
solcap_snp_c2_57260	chr03	53421920
solcap_snp_c2_57254	chr03	53433832
solcap_snp_c2_57256	chr03	53434069
solcap_snp_c2_57257	chr03	53434144
solcap_snp_c2_57258	chr03	53434206
solcap_snp_c1_16513	chr03	53436559
solcap_snp_c2_57263	chr03	53439319
solcap_snp_c1_5796	chr03	53526715
solcap_snp_c2_17667	chr03	53549043
solcap_snp_c1_5799	chr03	53572209
solcap_snp_c1_5812	chr03	53665337
solcap_snp_c2_17737	chr03	53747981
solcap_snp_c2_47843	chr03	54141894
solcap_snp_c1_7132	chr03	54314873
solcap_snp_c1_7076	chr03	54368685
solcap_snp_c1_7078	chr03	54369094
solcap_snp_c1_7082	chr03	54373785
solcap_snp_c1_7096	chr03	54469809
solcap_snp_c2_22466	chr03	54580832
solcap_snp_c1_7111	chr03	54582047
solcap_snp_c1_7112	chr03	54582101
solcap_snp_c1_7115	chr03	54657023
solcap_snp_c2_18459	chr03	55067483
solcap_snp_c2_18268	chr03	55234591
solcap_snp_c2_18269	chr03	55234622
solcap_snp_c2_18270	chr03	55234645
solcap_snp_c2_18271	chr03	55234747
solcap_snp_c2_18272	chr03	55234798
solcap_snp_c2_18273	chr03	55235957
solcap_snp_c2_18308	chr03	55291392
solcap_snp_c1_5951	chr03	55454889
solcap_snp_c1_5955	chr03	55642414
solcap_snp_c1_5956	chr03	55642455
solcap_snp_c2_18428	chr03	55645038
solcap_snp_c2_18429	chr03	55645069
solcap_snp_c2_18457	chr03	55786270
solcap_snp_c2_18463	chr03	55816412
solcap_snp_c2_18482	chr03	55883276
solcap_snp_c1_5959	chr03	55905943
solcap_snp_c2_18502	chr03	55910650
solcap_snp_c2_18503	chr03	55910771
solcap_snp_c2_18504	chr03	55910974
solcap_snp_c2_18506	chr03	55911538
solcap_snp_c2_18507	chr03	55911715
solcap_snp_c2_53258	chr03	55985522
solcap_snp_c1_15547	chr03	55999347
solcap_snp_c2_26466	chr03	56390223
solcap_snp_c2_26454	chr03	56440455
solcap_snp_c2_26417	chr03	56573127
solcap_snp_c2_26403	chr03	56604220
solcap_snp_c2_26402	chr03	56604264
solcap_snp_c2_26398	chr03	56604634
solcap_snp_c2_26382	chr03	56661756
solcap_snp_c2_26376	chr03	56667078
solcap_snp_c2_26375	chr03	56672317
solcap_snp_c2_26320	chr03	56935521
solcap_snp_c2_429	chr03	57296129
solcap_snp_c2_422	chr03	57311835
solcap_snp_c2_400	chr03	57405135
solcap_snp_c1_108	chr03	57407195
solcap_snp_c2_397	chr03	57407387
solcap_snp_c2_394	chr03	57407502
solcap_snp_c2_392	chr03	57407570
solcap_snp_c2_391	chr03	57407696
solcap_snp_c2_390	chr03	57407744
solcap_snp_c2_387	chr03	57407879
solcap_snp_c2_328	chr03	57566842
solcap_snp_c2_326	chr03	57568936
solcap_snp_c2_325	chr03	57568965
solcap_snp_c2_324	chr03	57569155
solcap_snp_c1_97	chr03	57569263
solcap_snp_c2_323	chr03	57569521
solcap_snp_c2_322	chr03	57569599
solcap_snp_c2_308	chr03	57601387
solcap_snp_c2_245	chr03	57875508
solcap_snp_c2_185	chr03	58106851
solcap_snp_c2_149	chr03	58286131
solcap_snp_c2_148	chr03	58295011
solcap_snp_c2_133	chr03	58322172
solcap_snp_c1_58	chr03	58455206
solcap_snp_c1_38	chr03	58609665
solcap_snp_c1_36	chr03	58609796
solcap_snp_c2_86	chr03	58611092
solcap_snp_c2_85	chr03	58611143
solcap_snp_c2_68	chr03	58651016
solcap_snp_c1_26	chr03	58658366
solcap_snp_c2_616	chr03	58877163
solcap_snp_c1_151	chr03	58944486
solcap_snp_c2_164	chr03	59574996
solcap_snp_c2_578	chr03	59769294
solcap_snp_c2_9630	chr03	60491901
solcap_snp_c1_3193	chr03	60880131
solcap_snp_c2_9497	chr03	60937507
solcap_snp_c2_9498	chr03	60937578
solcap_snp_c2_9531	chr03	61035987
solcap_snp_c2_37146	chr03	61757458
solcap_snp_c2_37139	chr03	61794475
solcap_snp_c2_37137	chr03	61796656
solcap_snp_c2_37136	chr03	61796934
solcap_snp_c2_37123	chr03	61870684
solcap_snp_c2_37121	chr03	61872439
solcap_snp_c2_37120	chr03	61872441
solcap_snp_c2_37119	chr03	61874817
solcap_snp_c2_37118	chr03	61876342
solcap_snp_c2_37100	chr03	61998553
solcap_snp_c1_16472	chr03	62033001
solcap_snp_c2_56824	chr03	62269671
solcap_snp_c2_39856	chr04	50676447
solcap_snp_c2_39847	chr04	50884547
solcap_snp_c2_39848	chr04	50884571
solcap_snp_c1_11791	chr04	50922404
solcap_snp_c1_13396	chr04	51021590
solcap_snp_c1_6033	chr04	51165594
solcap_snp_c1_6036	chr04	51343345
solcap_snp_c2_19001	chr04	51407692
solcap_snp_c1_6037	chr04	51603036
solcap_snp_c1_6040	chr04	51642492
solcap_snp_c2_55710	chr04	51813823
solcap_snp_c2_54533	chr04	51913379
solcap_snp_c1_15762	chr04	52019130
solcap_snp_c2_54229	chr04	52033872
solcap_snp_c1_15760	chr04	52037629
solcap_snp_c2_56238	chr04	52463182
solcap_snp_c2_1508	chr04	52513480
solcap_snp_c2_1506	chr04	52534629
solcap_snp_c2_48694	chr04	52890220
solcap_snp_c2_48691	chr04	52949494
solcap_snp_c2_48692	chr04	52949504
solcap_snp_c2_48693	chr04	52951523
solcap_snp_c1_14397	chr04	52955196
solcap_snp_c1_14398	chr04	52955198
solcap_snp_c2_53566	chr04	53071653
solcap_snp_c2_45035	chr04	53671782
solcap_snp_c2_45034	chr04	53671822
solcap_snp_c2_45123	chr04	53994118
solcap_snp_c1_15513	chr04	54125991
solcap_snp_c1_15983	chr04	54396697
solcap_snp_c1_15982	chr04	54396852
solcap_snp_c1_15977	chr04	54419164
solcap_snp_c2_54887	chr04	54438748
solcap_snp_c1_15878	chr04	54674058
solcap_snp_c2_48810	chr04	55407627
solcap_snp_c2_48808	chr04	55441858
solcap_snp_c2_21974	chr04	56449719
solcap_snp_c2_21973	chr04	56549845
solcap_snp_c1_6905	chr04	56622443
solcap_snp_c2_52738	chr04	56954459
solcap_snp_c2_57884	chr04	57242937
solcap_snp_c1_16625	chr04	57243271
solcap_snp_c2_52884	chr04	57280595
solcap_snp_c2_52887	chr04	57284957
solcap_snp_c2_52890	chr04	57285169
solcap_snp_c2_52892	chr04	57298517
solcap_snp_c2_43987	chr04	57891085
solcap_snp_c1_12945	chr04	57899405
solcap_snp_c2_43998	chr04	57899561
solcap_snp_c2_43999	chr04	57899858
solcap_snp_c2_44000	chr04	57899966
solcap_snp_c1_10441	chr04	58117285
solcap_snp_c2_34948	chr04	58265704
solcap_snp_c2_34957	chr04	58441497
solcap_snp_c2_34958	chr04	58441701
solcap_snp_c2_34960	chr04	58442164
solcap_snp_c2_54335	chr04	58532735
solcap_snp_c2_36061	chr04	58752313
solcap_snp_c2_36027	chr04	58830957
solcap_snp_c1_10750	chr04	58836709
solcap_snp_c1_10751	chr04	58845309
solcap_snp_c2_36037	chr04	58868987
solcap_snp_c1_10762	chr04	58875538
solcap_snp_c2_36045	chr04	58910549
solcap_snp_c2_36053	chr04	58951832
solcap_snp_c2_36059	chr04	59097353
solcap_snp_c2_36060	chr04	59098892
solcap_snp_c2_55849	chr04	59150916
solcap_snp_c2_39810	chr04	59803234
solcap_snp_c2_39807	chr04	59803681
solcap_snp_c2_39802	chr04	59828873
solcap_snp_c1_11750	chr04	59828910
solcap_snp_c2_39801	chr04	59829020
solcap_snp_c2_39800	chr04	59829029
solcap_snp_c2_39817	chr04	60000008
solcap_snp_c2_39816	chr04	60000105
solcap_snp_c1_11758	chr04	60037750
solcap_snp_c2_51220	chr04	60133081
solcap_snp_c2_51244	chr04	60198048
solcap_snp_c2_51242	chr04	60206967
solcap_snp_c1_15012	chr04	60213972
solcap_snp_c2_51234	chr04	60254953
solcap_snp_c1_15006	chr04	60255822
solcap_snp_c2_51232	chr04	60256759
solcap_snp_c2_53548	chr04	60611728
solcap_snp_c1_11363	chr04	61102521
solcap_snp_c1_11356	chr04	61160138
solcap_snp_c1_11352	chr04	61194011
solcap_snp_c1_11391	chr04	61215427
solcap_snp_c2_38116	chr04	61284452
solcap_snp_c2_48310	chr04	61490468
solcap_snp_c2_48290	chr04	61541735
solcap_snp_c2_37472	chr04	62092684
solcap_snp_c1_11206	chr04	62135720
solcap_snp_c1_11211	chr04	62257382
solcap_snp_c1_9771	chr04	62423409
solcap_snp_c1_9769	chr04	62427371
solcap_snp_c2_32601	chr04	62597434
solcap_snp_c2_32600	chr04	62597664
solcap_snp_c2_32550	chr04	62752969
solcap_snp_c2_32543	chr04	62775952
solcap_snp_c2_50004	chr04	63017719
solcap_snp_c2_49997	chr04	63076109
solcap_snp_c2_39463	chr04	63406121
solcap_snp_c2_39480	chr04	63433340
solcap_snp_c1_11670	chr04	63515949
solcap_snp_c2_39437	chr04	63548207
solcap_snp_c2_39439	chr04	63558935
solcap_snp_c2_39443	chr04	63562121
solcap_snp_c2_39447	chr04	63659301
solcap_snp_c2_39448	chr04	63659421
solcap_snp_c2_39450	chr04	63664170
solcap_snp_c2_39453	chr04	63668434
solcap_snp_c2_43736	chr04	63845729
solcap_snp_c2_43722	chr04	64012524
solcap_snp_c2_43735	chr04	64055406
solcap_snp_c2_43743	chr04	64061387
solcap_snp_c2_43748	chr04	64087659
solcap_snp_c1_11639	chr04	64134829
solcap_snp_c2_39343	chr04	64206034
solcap_snp_c2_39342	chr04	64216808
solcap_snp_c2_39341	chr04	64216910
solcap_snp_c2_39333	chr04	64234719
solcap_snp_c2_39327	chr04	64275135
solcap_snp_c1_12564	chr04	64549009
solcap_snp_c2_21590	chr04	64758588
solcap_snp_c2_21581	chr04	64775857
solcap_snp_c2_21578	chr04	64775909
solcap_snp_c2_21577	chr04	64776004
solcap_snp_c2_21573	chr04	64781980
solcap_snp_c2_21572	chr04	64781984
solcap_snp_c1_6758	chr04	64867844
solcap_snp_c1_6749	chr04	64973061
solcap_snp_c1_6748	chr04	64996975
solcap_snp_c2_21479	chr04	65000546
solcap_snp_c2_21364	chr04	65301176
solcap_snp_c2_21363	chr04	65301179
solcap_snp_c1_8328	chr04	65577930
solcap_snp_c2_26731	chr04	65583822
solcap_snp_c2_26758	chr04	65600291
solcap_snp_c2_26675	chr04	65727042
solcap_snp_c2_26681	chr04	65750963
solcap_snp_c2_26688	chr04	65767269
solcap_snp_c1_8316	chr04	65802638
solcap_snp_c1_7990	chr04	65866827
solcap_snp_c2_25282	chr04	65867121
solcap_snp_c2_25283	chr04	65867228
solcap_snp_c2_25284	chr04	65872176
solcap_snp_c2_55796	chr04	65969881
solcap_snp_c2_55791	chr04	65970282
solcap_snp_c2_55789	chr04	65970382
solcap_snp_c2_55788	chr04	65970724
solcap_snp_c2_55786	chr04	65970827
solcap_snp_c2_55785	chr04	65970953
solcap_snp_c2_55784	chr04	65970986
solcap_snp_c2_55783	chr04	65971150
solcap_snp_c2_55782	chr04	65971159
solcap_snp_c2_55780	chr04	65971280
solcap_snp_c2_55777	chr04	65971441
solcap_snp_c2_55776	chr04	65971563
solcap_snp_c1_16191	chr04	65971751
solcap_snp_c2_55775	chr04	65972399
solcap_snp_c2_55774	chr04	65972478
solcap_snp_c2_55773	chr04	65972517
solcap_snp_c2_55772	chr04	65972586
solcap_snp_c2_55768	chr04	65972774
solcap_snp_c2_26712	chr04	66043528
solcap_snp_c2_26713	chr04	66043536
solcap_snp_c1_8319	chr04	66074599
solcap_snp_c2_26740	chr04	66204641
solcap_snp_c2_26741	chr04	66204701
solcap_snp_c2_26742	chr04	66204783
solcap_snp_c2_26743	chr04	66204806
solcap_snp_c2_26744	chr04	66212305
solcap_snp_c2_38556	chr04	66415083
solcap_snp_c2_38611	chr04	66650026
solcap_snp_c2_44640	chr04	66777995
solcap_snp_c1_13172	chr04	66920028
solcap_snp_c2_32056	chr04	67048197
solcap_snp_c2_32042	chr04	67130719
solcap_snp_c2_32036	chr04	67171309
solcap_snp_c1_9619	chr04	67248738
solcap_snp_c1_9614	chr04	67294193
solcap_snp_c1_9613	chr04	67294211
solcap_snp_c2_32099	chr04	67342310
solcap_snp_c2_54446	chr04	67422348
solcap_snp_c1_15237	chr04	67552618
solcap_snp_c2_52206	chr04	67567676
solcap_snp_c2_52205	chr04	67570682
solcap_snp_c2_52203	chr04	67585796
solcap_snp_c2_52202	chr04	67609888
solcap_snp_c2_52196	chr04	67631273
solcap_snp_c2_52195	chr04	67631327
solcap_snp_c2_19584	chr04	67766128
solcap_snp_c1_10435	chr04	67842288
solcap_snp_c2_34890	chr04	67953469
solcap_snp_c2_34877	chr04	67981001
solcap_snp_c2_34876	chr04	67981010
solcap_snp_c2_34875	chr04	67981117
solcap_snp_c2_34874	chr04	67981149
solcap_snp_c2_34873	chr04	67981400
solcap_snp_c2_34872	chr04	67981423
solcap_snp_c2_34870	chr04	67981538
solcap_snp_c2_34869	chr04	67981553
solcap_snp_c2_34868	chr04	67982840
solcap_snp_c2_34867	chr04	67982950
solcap_snp_c2_34866	chr04	67983036
solcap_snp_c2_34865	chr04	67983299
solcap_snp_c2_34864	chr04	67983402
solcap_snp_c1_10428	chr04	67984407
solcap_snp_c2_34863	chr04	67984659
solcap_snp_c2_34862	chr04	67984665
solcap_snp_c1_10425	chr04	67985135
solcap_snp_c1_10424	chr04	67985201
solcap_snp_c2_34861	chr04	67985836
solcap_snp_c2_34812	chr04	68141446
solcap_snp_c2_34937	chr04	68259021
solcap_snp_c1_3166	chr04	68439384
solcap_snp_c2_56837	chr04	68481475
solcap_snp_c1_13077	chr04	68865108
solcap_snp_c2_12981	chr04	69026707
solcap_snp_c2_12976	chr04	69050482
solcap_snp_c1_4180	chr04	69079236
solcap_snp_c2_12959	chr04	69138945
solcap_snp_c2_12958	chr04	69148562
solcap_snp_c2_12957	chr04	69148700
solcap_snp_c2_12956	chr04	69148721
solcap_snp_c2_12955	chr04	69148829
solcap_snp_c2_12953	chr04	69150093
solcap_snp_c2_12947	chr04	69185901
solcap_snp_c2_12945	chr04	69186102
solcap_snp_c2_12938	chr04	69206404
solcap_snp_c2_12936	chr04	69206746
solcap_snp_c1_4175	chr04	69209192
solcap_snp_c2_12930	chr04	69311500
solcap_snp_c2_12928	chr04	69322253
solcap_snp_c1_4172	chr04	69323144
solcap_snp_c1_4171	chr04	69336216
solcap_snp_c2_12924	chr04	69345026
solcap_snp_c2_12913	chr04	69391846
solcap_snp_c1_4162	chr04	69391945
solcap_snp_c2_12903	chr04	69415006
solcap_snp_c1_10167	chr04	70185081
solcap_snp_c1_10168	chr04	70185119
solcap_snp_c1_10169	chr04	70186406
solcap_snp_c1_10178	chr04	70199242
solcap_snp_c1_10179	chr04	70199251
solcap_snp_c1_10180	chr04	70199444
solcap_snp_c1_10181	chr04	70200587
solcap_snp_c2_34017	chr04	70201797
solcap_snp_c2_34019	chr04	70222194
solcap_snp_c1_10196	chr04	70365272
solcap_snp_c1_10202	chr04	70396887
solcap_snp_c1_13349	chr04	70589201
solcap_snp_c2_35959	chr04	70787279
solcap_snp_c2_35958	chr04	70787357
solcap_snp_c1_10679	chr04	70805587
solcap_snp_c1_10678	chr04	70805737
solcap_snp_c1_10677	chr04	70805773
solcap_snp_c1_10676	chr04	70807043
solcap_snp_c2_35944	chr04	70878898
solcap_snp_c2_35942	chr04	70878916
solcap_snp_c1_10670	chr04	70880221
solcap_snp_c1_10669	chr04	70880440
solcap_snp_c1_10668	chr04	70880906
solcap_snp_c1_10667	chr04	70880971
solcap_snp_c1_10715	chr04	70939324
solcap_snp_c2_35999	chr04	70939674
solcap_snp_c2_35998	chr04	70939686
solcap_snp_c2_35997	chr04	70941431
solcap_snp_c2_35996	chr04	70945073
solcap_snp_c1_10714	chr04	70953672
solcap_snp_c1_10713	chr04	70954545
solcap_snp_c1_10712	chr04	70954662
solcap_snp_c1_10711	chr04	70954731
solcap_snp_c1_3450	chr04	71076408
solcap_snp_c2_10820	chr04	71333000
solcap_snp_c2_10819	chr04	71335030
solcap_snp_c1_3557	chr04	71336662
solcap_snp_c1_3553	chr04	71359551
solcap_snp_c2_10802	chr04	71383390
solcap_snp_c2_10801	chr04	71383392
solcap_snp_c2_10800	chr04	71383501
solcap_snp_c2_10799	chr04	71383530
solcap_snp_c1_3545	chr04	71383982
solcap_snp_c2_10798	chr04	71384419
solcap_snp_c1_3544	chr04	71385536
solcap_snp_c2_10797	chr04	71387933
solcap_snp_c2_10771	chr04	71449817
solcap_snp_c2_10694	chr04	71588152
solcap_snp_c2_10693	chr04	71588170
solcap_snp_c1_3526	chr04	71589190
solcap_snp_c1_3525	chr04	71590312
solcap_snp_c2_10692	chr04	71591813
solcap_snp_c1_3522	chr04	71591902
solcap_snp_c2_10690	chr04	71592088
solcap_snp_c2_10688	chr04	71592216
solcap_snp_c2_10687	chr04	71592285
solcap_snp_c2_10686	chr04	71592367
solcap_snp_c2_10685	chr04	71592390
solcap_snp_c2_10681	chr04	71592572
solcap_snp_c1_3515	chr04	71593900
solcap_snp_c1_3514	chr04	71593930
solcap_snp_c2_10659	chr04	71638210
solcap_snp_c2_10658	chr04	71638309
solcap_snp_c2_10656	chr04	71654784
solcap_snp_c2_10618	chr04	71826211
solcap_snp_c2_10617	chr04	71826257
solcap_snp_c2_10616	chr04	71826356
solcap_snp_c2_10615	chr04	71826365
solcap_snp_c2_10614	chr04	71827521
solcap_snp_c2_10613	chr04	71827833
solcap_snp_c2_10612	chr04	71828638
solcap_snp_c1_3497	chr04	71854295
solcap_snp_c1_3495	chr04	71866559
solcap_snp_c1_3494	chr04	71868365
solcap_snp_c1_3484	chr04	71945107
solcap_snp_c2_10568	chr04	71954528
solcap_snp_c2_10567	chr04	71954567
solcap_snp_c2_10566	chr04	71954636
solcap_snp_c2_10565	chr04	71955746
solcap_snp_c2_10563	chr04	71956350
solcap_snp_c1_3478	chr04	71956738
solcap_snp_c1_3476	chr04	71957094
solcap_snp_c2_10548	chr04	72022392
solcap_snp_c2_10547	chr04	72022751
solcap_snp_c1_3462	chr04	72026868
solcap_snp_c1_3461	chr04	72026885
solcap_snp_c1_3458	chr04	72039377
solcap_snp_c2_10539	chr04	72039398
solcap_snp_c2_50176	chr05	43712364
solcap_snp_c2_48355	chr05	44271960
solcap_snp_c1_16071	chr05	44448583
solcap_snp_c1_15965	chr05	44622109
solcap_snp_c1_14913	chr05	44713672
solcap_snp_c2_44373	chr05	44945062
solcap_snp_c2_44375	chr05	44945205
solcap_snp_c2_44385	chr05	44973442
solcap_snp_c1_13068	chr05	45125984
solcap_snp_c2_40803	chr05	45359901
solcap_snp_c1_12005	chr05	45542551
solcap_snp_c1_12003	chr05	45542672
solcap_snp_c2_40776	chr05	45544150
solcap_snp_c2_40775	chr05	45544180
solcap_snp_c1_11998	chr05	45545592
solcap_snp_c1_11997	chr05	45545670
solcap_snp_c1_11996	chr05	45545694
solcap_snp_c1_12016	chr05	45546170
solcap_snp_c1_12015	chr05	45546177
solcap_snp_c2_40821	chr05	45546574
solcap_snp_c1_12014	chr05	45598757
solcap_snp_c2_50840	chr05	45880548
solcap_snp_c2_50838	chr05	45880602
solcap_snp_c2_16446	chr05	45910606
solcap_snp_c2_51591	chr05	45992075
solcap_snp_c2_51578	chr05	46046095
solcap_snp_c2_49651	chr05	46288575
solcap_snp_c2_49653	chr05	46323215
solcap_snp_c2_49820	chr05	46363167
solcap_snp_c1_14684	chr05	46454617
solcap_snp_c2_49832	chr05	46553296
solcap_snp_c2_46941	chr05	46891499
solcap_snp_c1_12424	chr05	47001476
solcap_snp_c2_42390	chr05	47050080
solcap_snp_c1_12414	chr05	47122961
solcap_snp_c2_42374	chr05	47146520
solcap_snp_c1_12449	chr05	47308843
solcap_snp_c1_12448	chr05	47308888
solcap_snp_c1_12447	chr05	47309125
solcap_snp_c1_12446	chr05	47309135
solcap_snp_c1_12445	chr05	47309196
solcap_snp_c1_12444	chr05	47309576
solcap_snp_c1_12442	chr05	47309777
solcap_snp_c1_12440	chr05	47309920
solcap_snp_c1_12439	chr05	47324660
solcap_snp_c1_12419	chr05	47340872
solcap_snp_c1_16067	chr05	47387016
solcap_snp_c2_49140	chr05	47432612
solcap_snp_c2_49128	chr05	47454994
solcap_snp_c2_49147	chr05	47506482
solcap_snp_c2_49116	chr05	47535067
solcap_snp_c2_49117	chr05	47557989
solcap_snp_c2_49124	chr05	47573236
solcap_snp_c2_10311	chr05	47710741
solcap_snp_c2_10409	chr05	47747659
solcap_snp_c2_10410	chr05	47747766
solcap_snp_c2_10411	chr05	47747794
solcap_snp_c1_3371	chr05	47800112
solcap_snp_c1_3375	chr05	47886732
solcap_snp_c1_3392	chr05	47991614
solcap_snp_c1_3393	chr05	47991663
solcap_snp_c2_10287	chr05	48250197
solcap_snp_c2_10338	chr05	48410057
solcap_snp_c2_10339	chr05	48410135
solcap_snp_c2_10341	chr05	48410294
solcap_snp_c2_10358	chr05	48541183
solcap_snp_c2_10394	chr05	48582519
solcap_snp_c2_54372	chr05	48878549
solcap_snp_c2_54371	chr05	48887625
solcap_snp_c2_54370	chr05	48887667
solcap_snp_c2_54368	chr05	48888060
solcap_snp_c2_54365	chr05	48888480
solcap_snp_c2_54364	chr05	48888489
solcap_snp_c2_42542	chr05	49045619
solcap_snp_c2_42405	chr05	49092589
solcap_snp_c1_12454	chr05	49094113
solcap_snp_c2_42406	chr05	49094498
solcap_snp_c2_42450	chr05	49177407
solcap_snp_c2_42451	chr05	49177458
solcap_snp_c2_42452	chr05	49177482
solcap_snp_c2_42453	chr05	49179471
solcap_snp_c2_42455	chr05	49179532
solcap_snp_c2_42461	chr05	49185487
solcap_snp_c2_42473	chr05	49240696
solcap_snp_c2_42475	chr05	49242992
solcap_snp_c2_42481	chr05	49246855
solcap_snp_c2_42495	chr05	49260635
solcap_snp_c2_55571	chr05	49356615
solcap_snp_c2_55239	chr05	49460622
solcap_snp_c2_55240	chr05	49467229
solcap_snp_c2_8356	chr05	49719416
solcap_snp_c2_8426	chr05	49736378
solcap_snp_c2_8427	chr05	49736422
solcap_snp_c2_8428	chr05	49736471
solcap_snp_c2_8430	chr05	49737704
solcap_snp_c2_8431	chr05	49737818
solcap_snp_c2_8473	chr05	49744187
solcap_snp_c1_2799	chr05	49778404
solcap_snp_c2_8240	chr05	49804489
solcap_snp_c2_8253	chr05	49835932
solcap_snp_c2_8254	chr05	49835986
solcap_snp_c2_8256	chr05	49836134
solcap_snp_c2_8270	chr05	49840687
solcap_snp_c2_8278	chr05	49851548
solcap_snp_c2_8295	chr05	49888144
solcap_snp_c2_8302	chr05	49908824
solcap_snp_c1_2820	chr05	50067596
solcap_snp_c1_2840	chr05	50246886
solcap_snp_c1_2865	chr05	50396941
solcap_snp_c2_8460	chr05	50479738
solcap_snp_c2_8507	chr05	50583686
solcap_snp_c2_8509	chr05	50583833
solcap_snp_c2_8510	chr05	50583895
solcap_snp_c2_8511	chr05	50583953
solcap_snp_c2_8512	chr05	50583991
solcap_snp_c2_8517	chr05	50584317
solcap_snp_c2_8519	chr05	50584455
solcap_snp_c2_8521	chr05	50584500
solcap_snp_c2_8522	chr05	50584727
solcap_snp_c2_8210	chr05	50922126
solcap_snp_c2_3603	chr05	51145330
solcap_snp_c1_1195	chr05	51435110
solcap_snp_c2_3512	chr05	51477749
solcap_snp_c1_1163	chr05	51588199
solcap_snp_c2_3452	chr05	51696835
solcap_snp_c2_3451	chr05	51697156
solcap_snp_c1_1125	chr05	51698150
solcap_snp_c1_1124	chr05	51698153
solcap_snp_c1_1123	chr05	51698176
solcap_snp_c1_1094	chr05	51771399
solcap_snp_c1_1077	chr05	51830050
solcap_snp_c1_1250	chr05	51978384
solcap_snp_c1_1249	chr05	51980344
solcap_snp_c1_1219	chr05	51994498
solcap_snp_c1_1218	chr05	51996069
solcap_snp_c1_1216	chr05	51998374
solcap_snp_c1_12691	chr06	37867794
solcap_snp_c2_43068	chr06	37883612
solcap_snp_c2_43059	chr06	37940976
solcap_snp_c2_43058	chr06	37941102
solcap_snp_c2_43109	chr06	37969924
solcap_snp_c2_43107	chr06	37976441
solcap_snp_c2_43064	chr06	38059242
solcap_snp_c2_51774	chr06	38208809
solcap_snp_c2_51772	chr06	38210696
solcap_snp_c2_51771	chr06	38210711
solcap_snp_c2_51769	chr06	38211153
solcap_snp_c2_51767	chr06	38211306
solcap_snp_c2_51766	chr06	38211332
solcap_snp_c2_51765	chr06	38211470
solcap_snp_c2_51764	chr06	38211559
solcap_snp_c2_51762	chr06	38211638
solcap_snp_c2_51761	chr06	38211801
solcap_snp_c2_51760	chr06	38211989
solcap_snp_c2_51758	chr06	38212118
solcap_snp_c2_51757	chr06	38212853
solcap_snp_c2_56059	chr06	38291420
solcap_snp_c2_56058	chr06	38291438
solcap_snp_c2_56057	chr06	38291714
solcap_snp_c2_56056	chr06	38291760
solcap_snp_c2_56055	chr06	38298215
solcap_snp_c1_15233	chr06	38333228
[truncated: 1,055 more rows]

## Sheet: TableS5c_euchromatin
SolCAP_SNP_ID	chr_v403	position
solcap_snp_c2_51460	chr01	151047
solcap_snp_c2_36608	chr01	251132
solcap_snp_c2_36615	chr01	253077
solcap_snp_c2_36658	chr01	269400
solcap_snp_c1_10930	chr01	309342
solcap_snp_c2_36617	chr01	393135
solcap_snp_c2_36629	chr01	433801
solcap_snp_c1_10915	chr01	481295
solcap_snp_c1_10918	chr01	497066
solcap_snp_c2_36660	chr01	534626
solcap_snp_c2_36664	chr01	535454
solcap_snp_c1_10924	chr01	551280
solcap_snp_c2_36668	chr01	559640
solcap_snp_c2_54804	chr01	811699
solcap_snp_c2_54797	chr01	817205
solcap_snp_c2_56714	chr01	931173
solcap_snp_c2_6793	chr01	1314398
solcap_snp_c2_6865	chr01	1513856
solcap_snp_c2_6683	chr01	1828457
solcap_snp_c1_2417	chr01	1838864
solcap_snp_c2_6713	chr01	2068305
solcap_snp_c2_21078	chr01	2497514
solcap_snp_c2_21098	chr01	2589296
solcap_snp_c2_21099	chr01	2591087
solcap_snp_c2_21100	chr01	2591141
solcap_snp_c1_6651	chr01	2605589
solcap_snp_c1_6674	chr01	2822433
solcap_snp_c2_21227	chr01	2951280
solcap_snp_c2_21233	chr01	2956117
solcap_snp_c1_6704	chr01	2957398
solcap_snp_c2_21235	chr01	2958391
solcap_snp_c2_21247	chr01	3087549
solcap_snp_c1_6123	chr01	3296181
solcap_snp_c1_6114	chr01	3693421
solcap_snp_c1_6109	chr01	3716735
solcap_snp_c1_6108	chr01	3716741
solcap_snp_c2_19261	chr01	3921601
solcap_snp_c1_6083	chr01	3953090
solcap_snp_c2_19420	chr01	4013257
solcap_snp_c2_51812	chr01	4258102
solcap_snp_c2_51811	chr01	4258195
solcap_snp_c2_51810	chr01	4258310
solcap_snp_c2_51807	chr01	4258490
solcap_snp_c2_51806	chr01	4262027
solcap_snp_c2_51805	chr01	4262991
solcap_snp_c2_51804	chr01	4263036
solcap_snp_c2_51803	chr01	4263748
solcap_snp_c2_51800	chr01	4277333
solcap_snp_c2_51791	chr01	4309411
solcap_snp_c2_49938	chr01	4598036
solcap_snp_c2_49936	chr01	4603170
solcap_snp_c2_55012	chr01	4954114
solcap_snp_c2_48051	chr01	5079220
solcap_snp_c2_56125	chr01	5291766
solcap_snp_c2_45058	chr01	5347312
solcap_snp_c2_45071	chr01	5386865
solcap_snp_c1_13318	chr01	5431075
solcap_snp_c2_45056	chr01	5477755
solcap_snp_c2_45061	chr01	5498171
solcap_snp_c2_45064	chr01	5502048
solcap_snp_c1_13289	chr01	5505021
solcap_snp_c1_13293	chr01	5505313
solcap_snp_c1_13296	chr01	5523061
solcap_snp_c2_46523	chr01	59974049
solcap_snp_c2_46522	chr01	59974287
solcap_snp_c2_46521	chr01	59974382
solcap_snp_c2_46520	chr01	59974416
solcap_snp_c2_53347	chr01	60027044
solcap_snp_c2_35483	chr01	60240569
solcap_snp_c2_35480	chr01	60259084
solcap_snp_c2_35518	chr01	60512580
solcap_snp_c2_35520	chr01	60513299
solcap_snp_c2_35536	chr01	60515967
solcap_snp_c2_35537	chr01	60516974
solcap_snp_c2_43926	chr01	60887937
solcap_snp_c2_56267	chr01	60919390
solcap_snp_c2_20798	chr01	60951473
solcap_snp_c2_20799	chr01	60951506
solcap_snp_c2_20803	chr01	60987055
solcap_snp_c2_20890	chr01	61310905
solcap_snp_c2_20895	chr01	61326558
solcap_snp_c2_38428	chr01	62058760
solcap_snp_c2_38406	chr01	62145016
solcap_snp_c2_38405	chr01	62145049
solcap_snp_c2_38404	chr01	62148278
solcap_snp_c2_38448	chr01	62289376
solcap_snp_c1_12118	chr01	62612685
solcap_snp_c1_12106	chr01	62802774
solcap_snp_c1_12114	chr01	62851452
solcap_snp_c2_41335	chr01	62930839
solcap_snp_c2_41336	chr01	62930860
solcap_snp_c2_41337	chr01	62930893
solcap_snp_c2_41339	chr01	62931376
solcap_snp_c1_12131	chr01	62935879
solcap_snp_c2_32367	chr01	63183063
solcap_snp_c2_32359	chr01	63208319
solcap_snp_c1_9679	chr01	63338127
solcap_snp_c1_9676	chr01	63469625
solcap_snp_c2_40956	chr01	63724828
solcap_snp_c2_40954	chr01	63756796
solcap_snp_c2_40955	chr01	63874694
solcap_snp_c1_13686	chr01	64120888
solcap_snp_c2_46195	chr01	64259758
solcap_snp_c2_13751	chr01	64614014
solcap_snp_c2_13671	chr01	65062749
solcap_snp_c2_13653	chr01	65270050
solcap_snp_c2_13650	chr01	65277443
solcap_snp_c1_4744	chr01	65472778
solcap_snp_c2_14467	chr01	65694481
solcap_snp_c2_14468	chr01	65694528
solcap_snp_c2_14470	chr01	65696918
solcap_snp_c1_4706	chr01	65779952
solcap_snp_c2_14487	chr01	65780961
solcap_snp_c2_14489	chr01	65782007
solcap_snp_c2_14491	chr01	65782411
solcap_snp_c2_14492	chr01	65782472
solcap_snp_c2_14493	chr01	65782960
solcap_snp_c2_14495	chr01	65783163
solcap_snp_c1_4745	chr01	66093982
solcap_snp_c2_14580	chr01	66218939
solcap_snp_c1_4748	chr01	66259225
solcap_snp_c2_14589	chr01	66283056
solcap_snp_c1_4752	chr01	66336497
solcap_snp_c2_14608	chr01	66349597
solcap_snp_c2_14609	chr01	66349636
solcap_snp_c1_4757	chr01	66354337
solcap_snp_c1_4763	chr01	66376215
solcap_snp_c2_14616	chr01	66427942
solcap_snp_c2_14623	chr01	66431307
solcap_snp_c2_37575	chr01	66552387
solcap_snp_c1_5150	chr01	66675618
solcap_snp_c2_16039	chr01	66723137
solcap_snp_c1_5145	chr01	66903971
solcap_snp_c2_20569	chr01	67013319
solcap_snp_c1_6485	chr01	67136074
solcap_snp_c2_20500	chr01	67211029
solcap_snp_c2_20501	chr01	67211502
solcap_snp_c2_20502	chr01	67221911
solcap_snp_c2_20505	chr01	67223465
solcap_snp_c2_20506	chr01	67223718
solcap_snp_c2_20507	chr01	67223836
solcap_snp_c2_20508	chr01	67224536
solcap_snp_c2_20513	chr01	67277817
solcap_snp_c2_20514	chr01	67277826
solcap_snp_c2_20517	chr01	67279544
solcap_snp_c2_20521	chr01	67293176
solcap_snp_c2_20522	chr01	67294103
solcap_snp_c1_6501	chr01	67459462
solcap_snp_c1_6518	chr01	67605501
solcap_snp_c1_6521	chr01	67735399
solcap_snp_c2_13766	chr01	67896790
solcap_snp_c2_52492	chr01	67969608
solcap_snp_c2_13758	chr01	67996863
solcap_snp_c2_52484	chr01	68069876
solcap_snp_c1_15340	chr01	68127604
solcap_snp_c1_14588	chr01	68350967
solcap_snp_c2_49476	chr01	68412973
solcap_snp_c2_49451	chr01	68416246
solcap_snp_c1_14044	chr01	68529707
solcap_snp_c2_51055	chr01	68950390
solcap_snp_c2_51057	chr01	68950624
solcap_snp_c1_11769	chr01	69200171
solcap_snp_c2_39834	chr01	69381132
solcap_snp_c2_17592	chr01	69809843
solcap_snp_c2_17529	chr01	69902011
solcap_snp_c1_5759	chr01	69917893
solcap_snp_c2_17530	chr01	69918804
solcap_snp_c2_17531	chr01	70016241
solcap_snp_c2_17537	chr01	70097516
solcap_snp_c2_17539	chr01	70223686
solcap_snp_c1_15579	chr01	70341065
solcap_snp_c1_15580	chr01	70341095
solcap_snp_c2_53380	chr01	70371898
solcap_snp_c2_53381	chr01	70372129
solcap_snp_c2_17193	chr01	70472380
solcap_snp_c2_17192	chr01	70472766
solcap_snp_c2_17191	chr01	70474651
solcap_snp_c1_5657	chr01	70560219
solcap_snp_c1_5656	chr01	70562984
solcap_snp_c1_5653	chr01	70697501
solcap_snp_c1_3860	chr01	71009588
solcap_snp_c1_3844	chr01	71088529
solcap_snp_c2_12076	chr01	71090764
solcap_snp_c1_3867	chr01	71239398
solcap_snp_c1_3868	chr01	71239659
solcap_snp_c1_3876	chr01	71278355
solcap_snp_c2_12106	chr01	71298295
solcap_snp_c1_3894	chr01	71421420
solcap_snp_c1_3895	chr01	71444070
solcap_snp_c2_12123	chr01	71450058
solcap_snp_c2_12125	chr01	71450400
solcap_snp_c2_12126	chr01	71450692
solcap_snp_c2_12167	chr01	71807851
solcap_snp_c2_12215	chr01	72051338
solcap_snp_c2_12216	chr01	72051529
solcap_snp_c2_12217	chr01	72051556
solcap_snp_c1_3848	chr01	72108318
solcap_snp_c1_3850	chr01	72111134
solcap_snp_c1_3851	chr01	72111964
solcap_snp_c1_3852	chr01	72111974
solcap_snp_c1_3853	chr01	72112445
solcap_snp_c1_3854	chr01	72112573
solcap_snp_c1_9565	chr01	72320461
solcap_snp_c1_9573	chr01	72504467
solcap_snp_c2_31820	chr01	72528571
solcap_snp_c2_31821	chr01	72531363
solcap_snp_c1_9583	chr01	72540500
solcap_snp_c1_9587	chr01	72540975
solcap_snp_c2_19956	chr01	72742546
solcap_snp_c1_6294	chr01	73340313
solcap_snp_c1_14089	chr01	73706321
solcap_snp_c2_14274	chr01	74061521
solcap_snp_c1_4595	chr01	74193922
solcap_snp_c1_4604	chr01	74257861
solcap_snp_c1_4615	chr01	74352528
solcap_snp_c1_4617	chr01	74355334
solcap_snp_c1_4622	chr01	74360132
solcap_snp_c2_14350	chr01	74628218
solcap_snp_c2_14365	chr01	74688162
solcap_snp_c2_14366	chr01	74688218
solcap_snp_c1_4666	chr01	74741574
solcap_snp_c1_5254	chr01	75045959
solcap_snp_c1_5295	chr01	75079617
solcap_snp_c2_16369	chr01	75163958
solcap_snp_c1_5267	chr01	75333653
solcap_snp_c1_5281	chr01	75442012
solcap_snp_c1_5286	chr01	75477670
solcap_snp_c1_5287	chr01	75477673
solcap_snp_c2_16424	chr01	75478358
solcap_snp_c2_16425	chr01	75485176
solcap_snp_c2_16426	chr01	75485233
solcap_snp_c2_16466	chr01	75748919
solcap_snp_c1_5346	chr01	75789812
solcap_snp_c2_58375	chr01	76242413
solcap_snp_c2_2509	chr01	76406645
solcap_snp_c1_573	chr01	76465282
solcap_snp_c2_2291	chr01	76480545
solcap_snp_c1_594	chr01	76480694
solcap_snp_c2_2307	chr01	76486675
solcap_snp_c1_636	chr01	76505319
solcap_snp_c1_641	chr01	76511247
solcap_snp_c1_683	chr01	76615839
solcap_snp_c2_2400	chr01	76920170
solcap_snp_c2_2420	chr01	76952905
solcap_snp_c2_2421	chr01	76957665
solcap_snp_c2_2423	chr01	76958577
solcap_snp_c2_2424	chr01	76960016
solcap_snp_c2_2426	chr01	76960196
solcap_snp_c2_2427	chr01	76960244
solcap_snp_c2_2463	chr01	77190763
solcap_snp_c2_2464	chr01	77190791
solcap_snp_c2_2465	chr01	77191340
solcap_snp_c2_2466	chr01	77191350
solcap_snp_c1_711	chr01	77207561
solcap_snp_c2_2505	chr01	77350877
solcap_snp_c2_2506	chr01	77351069
solcap_snp_c2_2507	chr01	77351135
solcap_snp_c2_2508	chr01	77353150
solcap_snp_c1_730	chr01	77353237
solcap_snp_c1_737	chr01	77401317
solcap_snp_c2_2551	chr01	77488165
solcap_snp_c1_758	chr01	77526828
solcap_snp_c2_2571	chr01	77596089
solcap_snp_c2_2186	chr01	77652861
solcap_snp_c2_2201	chr01	77738822
solcap_snp_c1_590	chr01	78142002
solcap_snp_c1_607	chr01	78176186
solcap_snp_c2_2299	chr01	78192298
solcap_snp_c2_2354	chr01	78430645
solcap_snp_c2_2384	chr01	78663168
solcap_snp_c2_50486	chr01	78756700
solcap_snp_c2_50485	chr01	78756913
solcap_snp_c2_50483	chr01	78757227
solcap_snp_c2_50502	chr01	78809481
solcap_snp_c1_15872	chr01	78928270
solcap_snp_c2_7007	chr01	79083750
solcap_snp_c1_2459	chr01	79083994
solcap_snp_c1_2484	chr01	79157411
solcap_snp_c2_7094	chr01	79186993
solcap_snp_c2_7192	chr01	79391736
solcap_snp_c2_7193	chr01	79391898
solcap_snp_c2_7208	chr01	79456101
solcap_snp_c1_2519	chr01	79487269
solcap_snp_c1_2520	chr01	79487385
solcap_snp_c2_7223	chr01	79510775
solcap_snp_c2_7241	chr01	79678700
solcap_snp_c2_7242	chr01	79678961
solcap_snp_c2_7245	chr01	79679333
solcap_snp_c2_7246	chr01	79679819
solcap_snp_c2_7248	chr01	79679995
solcap_snp_c1_2531	chr01	79711229
solcap_snp_c1_2535	chr01	79784789
solcap_snp_c2_7328	chr01	79955869
solcap_snp_c2_6990	chr01	80077322
solcap_snp_c1_2458	chr01	80121257
solcap_snp_c2_7053	chr01	80228612
solcap_snp_c2_7054	chr01	80229782
solcap_snp_c2_7055	chr01	80229851
solcap_snp_c2_7056	chr01	80229923
solcap_snp_c2_7059	chr01	80230402
solcap_snp_c2_7061	chr01	80230721
solcap_snp_c1_1853	chr01	80429024
solcap_snp_c1_1847	chr01	80524241
solcap_snp_c2_5091	chr01	80559077
solcap_snp_c1_1838	chr01	80560392
solcap_snp_c1_1837	chr01	80561111
solcap_snp_c2_5078	chr01	80591939
solcap_snp_c2_5077	chr01	80592092
solcap_snp_c2_5039	chr01	80669302
solcap_snp_c2_9728	chr01	80833304
solcap_snp_c2_9727	chr01	80833454
solcap_snp_c2_9726	chr01	80833655
solcap_snp_c1_3227	chr01	80834539
solcap_snp_c2_9722	chr01	80835981
solcap_snp_c2_9988	chr01	81013179
solcap_snp_c2_9925	chr01	81410256
solcap_snp_c2_9908	chr01	81464383
solcap_snp_c2_9892	chr01	81567297
solcap_snp_c2_9864	chr01	81615781
solcap_snp_c1_3275	chr01	81750427
solcap_snp_c1_3273	chr01	81750832
solcap_snp_c1_3255	chr01	81795435
solcap_snp_c1_3241	chr01	81924913
solcap_snp_c1_3234	chr01	81927446
solcap_snp_c1_3199	chr01	81936802
solcap_snp_c1_3292	chr01	81971208
solcap_snp_c2_9744	chr01	82026244
solcap_snp_c1_15123	chr01	82424459
solcap_snp_c2_4896	chr01	82629061
solcap_snp_c2_4754	chr01	82787205
solcap_snp_c2_4798	chr01	82927826
solcap_snp_c2_4799	chr01	82927841
solcap_snp_c1_1638	chr01	82935946
solcap_snp_c1_1645	chr01	82954172
solcap_snp_c1_1653	chr01	83012088
solcap_snp_c1_1683	chr01	83059266
solcap_snp_c1_1684	chr01	83059316
solcap_snp_c2_4844	chr01	83060566
solcap_snp_c2_4845	chr01	83060620
solcap_snp_c2_4860	chr01	83130290
solcap_snp_c2_4864	chr01	83138255
solcap_snp_c2_4875	chr01	83177518
solcap_snp_c2_4884	chr01	83187094
solcap_snp_c2_4885	chr01	83187100
solcap_snp_c2_4898	chr01	83283673
solcap_snp_c2_4904	chr01	83416455
solcap_snp_c2_4905	chr01	83416555
solcap_snp_c2_4906	chr01	83416662
solcap_snp_c2_4907	chr01	83418674
solcap_snp_c2_4908	chr01	83419031
solcap_snp_c2_4910	chr01	83419440
solcap_snp_c2_4920	chr01	83488954
solcap_snp_c1_1739	chr01	83608525
solcap_snp_c2_4614	chr01	83843357
solcap_snp_c1_1591	chr01	84026698
solcap_snp_c2_4664	chr01	84062794
solcap_snp_c2_4665	chr01	84062807
solcap_snp_c2_4702	chr01	84208108
solcap_snp_c2_4705	chr01	84214190
solcap_snp_c2_4706	chr01	84214236
solcap_snp_c2_4707	chr01	84214331
solcap_snp_c2_4708	chr01	84214593
solcap_snp_c2_4709	chr01	84214632
solcap_snp_c2_4710	chr01	84214717
solcap_snp_c2_4713	chr01	84217773
solcap_snp_c2_4715	chr01	84219154
solcap_snp_c2_36571	chr01	84398766
solcap_snp_c2_36577	chr01	84401586
solcap_snp_c2_36579	chr01	84405463
solcap_snp_c2_36495	chr01	84457106
solcap_snp_c2_36537	chr01	84596689
solcap_snp_c2_34548	chr01	84727196
solcap_snp_c2_34547	chr01	84727244
solcap_snp_c2_34546	chr01	84728052
solcap_snp_c1_10358	chr01	84900698
solcap_snp_c1_10354	chr01	84979169
solcap_snp_c2_34478	chr01	85047878
solcap_snp_c1_22	chr01	85243930
solcap_snp_c1_23	chr01	85244059
solcap_snp_c2_24	chr01	85323395
solcap_snp_c2_42	chr01	85466533
solcap_snp_c2_46442	chr01	85499588
solcap_snp_c2_46451	chr01	85544623
solcap_snp_c2_46455	chr01	85545111
solcap_snp_c2_46439	chr01	85660794
solcap_snp_c2_13385	chr01	85715615
solcap_snp_c2_46448	chr01	85760205
solcap_snp_c2_53077	chr01	85897859
solcap_snp_c2_53075	chr01	85902599
solcap_snp_c2_42943	chr01	85953453
solcap_snp_c2_49925	chr01	86088641
solcap_snp_c2_49918	chr01	86090282
solcap_snp_c2_49917	chr01	86090388
solcap_snp_c2_49914	chr01	86090567
solcap_snp_c2_49911	chr01	86095563
solcap_snp_c2_49910	chr01	86095990
solcap_snp_c2_49906	chr01	86153316
solcap_snp_c2_49905	chr01	86153327
solcap_snp_c2_49897	chr01	86164613
solcap_snp_c1_4800	chr01	86251604
solcap_snp_c2_14792	chr01	86305614
solcap_snp_c2_14794	chr01	86305814
solcap_snp_c2_14839	chr01	86328884
solcap_snp_c2_14703	chr01	86354960
solcap_snp_c2_14704	chr01	86355044
solcap_snp_c2_14706	chr01	86355281
solcap_snp_c2_14707	chr01	86355313
solcap_snp_c2_14708	chr01	86356334
solcap_snp_c2_14709	chr01	86356478
solcap_snp_c1_4796	chr01	86387941
solcap_snp_c2_14730	chr01	86441457
solcap_snp_c2_14731	chr01	86442644
solcap_snp_c2_14733	chr01	86527570
solcap_snp_c2_14740	chr01	86598470
solcap_snp_c2_14741	chr01	86602967
solcap_snp_c1_4799	chr01	86663670
solcap_snp_c2_14760	chr01	86745999
solcap_snp_c2_14761	chr01	86750211
solcap_snp_c2_14762	chr01	86750499
solcap_snp_c2_14763	chr01	86847460
solcap_snp_c2_14764	chr01	86847564
solcap_snp_c2_14765	chr01	86847570
solcap_snp_c2_14766	chr01	86847750
solcap_snp_c2_14767	chr01	86848639
solcap_snp_c2_14772	chr01	86877878
solcap_snp_c2_14779	chr01	86887703
solcap_snp_c1_4803	chr01	86942383
solcap_snp_c2_14809	chr01	87030691
solcap_snp_c2_14827	chr01	87096729
solcap_snp_c2_14838	chr01	87161066
solcap_snp_c2_14840	chr01	87161681
solcap_snp_c2_14841	chr01	87161795
solcap_snp_c2_14843	chr01	87180917
solcap_snp_c2_14848	chr01	87196723
solcap_snp_c2_14903	chr01	87322718
solcap_snp_c2_37836	chr01	87392925
solcap_snp_c2_37820	chr01	87463611
solcap_snp_c1_11288	chr01	87558284
solcap_snp_c2_37794	chr01	87600773
solcap_snp_c1_11308	chr01	87663628
solcap_snp_c2_37830	chr01	87731582
solcap_snp_c2_37850	chr01	87731694
solcap_snp_c2_37872	chr01	87733935
solcap_snp_c2_37816	chr01	87746117
solcap_snp_c1_11290	chr01	87749782
solcap_snp_c1_9428	chr01	87944567
solcap_snp_c1_9430	chr01	87965133
solcap_snp_c2_31041	chr01	87973310
solcap_snp_c2_31042	chr01	87982085
solcap_snp_c1_9434	chr01	88022361
solcap_snp_c2_22105	chr01	88057276
solcap_snp_c2_54344	chr01	88127428
solcap_snp_c2_56309	chr01	88173638
solcap_snp_c1_9413	chr01	88294149
solcap_snp_c1_9411	chr01	88294281
solcap_snp_c2_30973	chr01	88322772
solcap_snp_c1_9406	chr01	88347389
solcap_snp_c2_30963	chr01	88362869
solcap_snp_c2_30961	chr01	88389559
solcap_snp_c1_9397	chr01	88409494
solcap_snp_c1_9392	chr01	88434918
solcap_snp_c2_30960	chr01	88451543
solcap_snp_c2_30959	chr01	88451740
solcap_snp_c2_30958	chr01	88451745
solcap_snp_c2_30957	chr01	88451789
solcap_snp_c2_30956	chr01	88451932
solcap_snp_c2_30955	chr01	88452136
solcap_snp_c1_9386	chr01	88471573
solcap_snp_c2_31066	chr01	88535784
solcap_snp_c1_9385	chr01	88583876
solcap_snp_c1_9120	chr02	18883765
solcap_snp_c2_30156	chr02	19537381
solcap_snp_c2_30157	chr02	19537424
solcap_snp_c2_30158	chr02	19537468
solcap_snp_c2_30160	chr02	19538764
solcap_snp_c2_30162	chr02	19538859
solcap_snp_c2_30164	chr02	19580609
solcap_snp_c2_30171	chr02	19605917
solcap_snp_c2_47765	chr02	19874372
solcap_snp_c1_14142	chr02	19911208
solcap_snp_c2_55863	chr02	19963833
solcap_snp_c2_47760	chr02	20034673
solcap_snp_c2_17387	chr02	20193466
solcap_snp_c2_17400	chr02	20235232
solcap_snp_c1_16708	chr02	20355744
solcap_snp_c1_5732	chr02	20476838
solcap_snp_c2_17415	chr02	20497672
solcap_snp_c2_17424	chr02	20681182
solcap_snp_c2_17427	chr02	20681291
solcap_snp_c2_17428	chr02	20681320
solcap_snp_c1_5739	chr02	20681610
solcap_snp_c1_5740	chr02	20681658
solcap_snp_c1_5750	chr02	20767146
solcap_snp_c1_5751	chr02	20802070
solcap_snp_c2_17480	chr02	20828121
solcap_snp_c2_17494	chr02	20848347
solcap_snp_c2_40336	chr02	21205475
solcap_snp_c1_16286	chr02	21518196
solcap_snp_c1_11344	chr02	21725617
solcap_snp_c2_38007	chr02	21868107
solcap_snp_c2_38022	chr02	22006899
solcap_snp_c2_32381	chr02	22393286
solcap_snp_c1_9691	chr02	22417546
solcap_snp_c2_32400	chr02	22419484
solcap_snp_c2_32406	chr02	22501415
solcap_snp_c1_9695	chr02	22600527
solcap_snp_c2_32413	chr02	22601132
solcap_snp_c2_32415	chr02	22602148
solcap_snp_c2_32417	chr02	22604793
solcap_snp_c2_32421	chr02	22621454
solcap_snp_c1_9701	chr02	22672560
solcap_snp_c2_32440	chr02	22737101
solcap_snp_c1_9717	chr02	22749216
solcap_snp_c1_9719	chr02	22749459
solcap_snp_c1_9724	chr02	22749951
solcap_snp_c1_9728	chr02	22751697
solcap_snp_c2_50885	chr02	22810921
solcap_snp_c2_50878	chr02	22849535
solcap_snp_c2_57247	chr02	23360573
solcap_snp_c2_39705	chr02	23426000
solcap_snp_c2_39671	chr02	23504101
solcap_snp_c2_39677	chr02	23550242
solcap_snp_c1_11124	chr02	23690363
solcap_snp_c2_37254	chr02	23798841
solcap_snp_c1_11122	chr02	23799702
solcap_snp_c1_11120	chr02	23799767
solcap_snp_c2_37248	chr02	23800477
solcap_snp_c2_37245	chr02	23983466
solcap_snp_c2_33996	chr02	24149038
solcap_snp_c2_33993	chr02	24184641
solcap_snp_c2_53818	chr02	24744980
solcap_snp_c2_52630	chr02	24910452
solcap_snp_c2_21759	chr02	25003703
solcap_snp_c2_21752	chr02	25050263
solcap_snp_c1_6841	chr02	25051954
solcap_snp_c2_21746	chr02	25072603
solcap_snp_c2_21732	chr02	25305517
solcap_snp_c2_21722	chr02	25322260
solcap_snp_c2_21721	chr02	25322287
solcap_snp_c2_21717	chr02	25423284
solcap_snp_c2_21682	chr02	25478266
solcap_snp_c2_21661	chr02	25508015
solcap_snp_c1_6825	chr02	25514625
solcap_snp_c2_21655	chr02	25560351
solcap_snp_c2_21646	chr02	25564066
solcap_snp_c1_6816	chr02	25612912
solcap_snp_c2_21745	chr02	25726378
solcap_snp_c1_16021	chr02	25838557
solcap_snp_c1_11499	chr02	25936033
solcap_snp_c1_11498	chr02	25936087
solcap_snp_c1_11495	chr02	25936297
solcap_snp_c2_38704	chr02	26025648
solcap_snp_c1_11491	chr02	26158341
solcap_snp_c2_38721	chr02	26199529
solcap_snp_c1_11494	chr02	26262335
solcap_snp_c1_9356	chr02	26744045
solcap_snp_c1_9363	chr02	26771646
solcap_snp_c1_9369	chr02	26799085
solcap_snp_c2_56640	chr02	26939177
solcap_snp_c2_45307	chr02	27086672
solcap_snp_c2_45308	chr02	27086756
solcap_snp_c2_45310	chr02	27088040
solcap_snp_c2_45311	chr02	27088240
solcap_snp_c2_45316	chr02	27097448
solcap_snp_c2_45319	chr02	27097616
solcap_snp_c2_45322	chr02	27099641
solcap_snp_c2_45323	chr02	27099743
solcap_snp_c1_13459	chr02	27143975
solcap_snp_c1_13465	chr02	27190087
solcap_snp_c2_54094	chr02	27290595
solcap_snp_c1_12320	chr02	27375174
solcap_snp_c1_12339	chr02	27411239
solcap_snp_c1_12345	chr02	27412222
solcap_snp_c1_12354	chr02	27419948
solcap_snp_c1_12305	chr02	27459050
solcap_snp_c2_41963	chr02	27511649
solcap_snp_c1_12310	chr02	27553265
solcap_snp_c2_41980	chr02	27557527
solcap_snp_c1_12330	chr02	27618698
solcap_snp_c2_42059	chr02	27676733
solcap_snp_c2_42060	chr02	27679089
solcap_snp_c2_38942	chr02	27856828
solcap_snp_c2_38941	chr02	27856858
solcap_snp_c2_38940	chr02	27856861
solcap_snp_c2_38939	chr02	27856921
solcap_snp_c1_11554	chr02	27857415
solcap_snp_c1_11553	chr02	27857419
solcap_snp_c2_38938	chr02	27859923
solcap_snp_c2_38936	chr02	27860001
solcap_snp_c2_38932	chr02	27880249
solcap_snp_c1_11546	chr02	27982556
solcap_snp_c1_11544	chr02	27982808
solcap_snp_c1_11556	chr02	28040094
solcap_snp_c2_52135	chr02	28112404
solcap_snp_c1_15213	chr02	28147347
solcap_snp_c2_38952	chr02	28230212
solcap_snp_c1_13769	chr02	28505685
solcap_snp_c2_19692	chr02	28746087
solcap_snp_c1_5091	chr02	28831038
solcap_snp_c1_5088	chr02	28832309
solcap_snp_c2_15749	chr02	28938773
solcap_snp_c2_48239	chr02	29093511
solcap_snp_c2_48238	chr02	29093735
solcap_snp_c2_48237	chr02	29093850
solcap_snp_c1_14280	chr02	29135932
solcap_snp_c2_48198	chr02	29136168
solcap_snp_c2_48195	chr02	29136866
solcap_snp_c2_48194	chr02	29136948
solcap_snp_c1_14293	chr02	29163404
solcap_snp_c2_39155	chr02	29312995
solcap_snp_c2_51115	chr02	29665296
solcap_snp_c1_13912	chr02	29883619
solcap_snp_c2_46903	chr02	29922614
solcap_snp_c2_46904	chr02	29922863
solcap_snp_c2_46906	chr02	29922924
solcap_snp_c1_13929	chr02	29929027
solcap_snp_c2_46908	chr02	29929772
solcap_snp_c2_46909	chr02	29930069
solcap_snp_c1_13910	chr02	29990972
solcap_snp_c1_13911	chr02	30022358
solcap_snp_c2_46885	chr02	30044642
solcap_snp_c2_46887	chr02	30044782
solcap_snp_c2_46898	chr02	30147347
solcap_snp_c2_57789	chr02	30266494
solcap_snp_c1_7469	chr02	30364307
solcap_snp_c1_7412	chr02	30401430
solcap_snp_c1_7430	chr02	30480670
solcap_snp_c2_23139	chr02	30534382
solcap_snp_c2_23169	chr02	30785582
solcap_snp_c2_23170	chr02	30785663
solcap_snp_c2_23188	chr02	31021346
solcap_snp_c2_23192	chr02	31060140
solcap_snp_c2_41495	chr02	31447986
solcap_snp_c1_12169	chr02	31520933
solcap_snp_c2_41534	chr02	31571293
solcap_snp_c2_41541	chr02	31590970
solcap_snp_c1_13236	chr02	31663285
solcap_snp_c1_13233	chr02	31714404
solcap_snp_c2_44982	chr02	31885152
solcap_snp_c2_39191	chr02	32084808
solcap_snp_c2_39178	chr02	32148414
solcap_snp_c2_39175	chr02	32166954
solcap_snp_c1_11581	chr02	32220107
solcap_snp_c1_13887	chr02	32451482
solcap_snp_c2_44774	chr02	32668601
solcap_snp_c1_13187	chr02	32669719
solcap_snp_c2_44776	chr02	32669950
solcap_snp_c2_44777	chr02	32670900
solcap_snp_c2_44778	chr02	32671197
solcap_snp_c2_44768	chr02	32806337
solcap_snp_c2_44769	chr02	32820618
solcap_snp_c2_44770	chr02	32822982
solcap_snp_c2_13051	chr02	33076297
solcap_snp_c2_13035	chr02	33106169
solcap_snp_c1_4192	chr02	33204519
solcap_snp_c2_51995	chr02	33266694
solcap_snp_c2_51998	chr02	33270568
solcap_snp_c1_15178	chr02	33276009
solcap_snp_c2_52011	chr02	33339084
solcap_snp_c2_51985	chr02	33352128
solcap_snp_c2_51990	chr02	33357550
solcap_snp_c2_48784	chr02	33668270
solcap_snp_c2_47037	chr02	33978983
solcap_snp_c1_12287	chr02	34078475
solcap_snp_c1_12264	chr02	34171906
solcap_snp_c1_12257	chr02	34211649
solcap_snp_c1_12251	chr02	34237017
solcap_snp_c2_33108	chr02	34739125
solcap_snp_c1_11892	chr02	34928666
solcap_snp_c2_40155	chr02	35112246
solcap_snp_c2_40168	chr02	35183801
solcap_snp_c2_40172	chr02	35186396
solcap_snp_c2_50570	chr02	35399277
solcap_snp_c2_55199	chr02	35523028
solcap_snp_c2_50394	chr02	35549497
solcap_snp_c2_50391	chr02	35579208
solcap_snp_c2_50412	chr02	35600642
solcap_snp_c2_50405	chr02	35657856
solcap_snp_c2_27433	chr02	35990827
solcap_snp_c2_17973	chr02	36229830
solcap_snp_c2_17954	chr02	36329310
solcap_snp_c2_17938	chr02	36364447
solcap_snp_c2_17937	chr02	36364535
solcap_snp_c2_17935	chr02	36364709
solcap_snp_c2_17934	chr02	36364714
solcap_snp_c2_17932	chr02	36364867
solcap_snp_c2_17930	chr02	36365001
solcap_snp_c2_17926	chr02	36365601
solcap_snp_c2_17922	chr02	36374698
solcap_snp_c2_17921	chr02	36375306
solcap_snp_c2_17914	chr02	36422460
solcap_snp_c2_17901	chr02	36455029
solcap_snp_c2_17900	chr02	36455167
solcap_snp_c2_17899	chr02	36455254
solcap_snp_c2_17897	chr02	36455671
solcap_snp_c2_17896	chr02	36455707
solcap_snp_c2_17895	chr02	36455917
solcap_snp_c2_17858	chr02	36599213
solcap_snp_c2_17816	chr02	36728587
solcap_snp_c2_17809	chr02	36799197
solcap_snp_c1_5837	chr02	36837559
solcap_snp_c1_5881	chr02	36868741
solcap_snp_c1_5846	chr02	36959331
solcap_snp_c1_5845	chr02	36959334
solcap_snp_c2_49495	chr02	37017928
solcap_snp_c1_12377	chr02	37341815
solcap_snp_c2_42244	chr02	37369714
solcap_snp_c1_12386	chr02	37411847
solcap_snp_c2_42172	chr02	37439083
solcap_snp_c1_16170	chr02	37474663
solcap_snp_c2_55632	chr02	37474756
solcap_snp_c1_16171	chr02	37474969
solcap_snp_c1_16172	chr02	37475092
solcap_snp_c1_12373	chr02	37530501
solcap_snp_c1_12375	chr02	37530951
solcap_snp_c1_12382	chr02	37654538
solcap_snp_c2_42241	chr02	37676152
solcap_snp_c2_35212	chr02	37830883
solcap_snp_c2_35210	chr02	37831871
solcap_snp_c1_10494	chr02	37846065
solcap_snp_c1_10493	chr02	37890365
solcap_snp_c1_10492	chr02	37890658
solcap_snp_c1_10491	chr02	37903454
solcap_snp_c2_35165	chr02	37982843
solcap_snp_c2_35139	chr02	38046786
solcap_snp_c1_10471	chr02	38103808
solcap_snp_c2_35113	chr02	38121256
solcap_snp_c2_35147	chr02	38230143
solcap_snp_c1_15466	chr02	38386350
solcap_snp_c2_40610	chr02	38654150
solcap_snp_c2_53037	chr02	38688212
solcap_snp_c2_53036	chr02	38688295
solcap_snp_c2_53035	chr02	38688398
solcap_snp_c2_53034	chr02	38688454
solcap_snp_c2_53033	chr02	38688568
solcap_snp_c1_15481	chr02	38689941
solcap_snp_c1_11955	chr02	38837610
solcap_snp_c1_11972	chr02	39062507
solcap_snp_c2_40635	chr02	39073504
solcap_snp_c2_40636	chr02	39073567
solcap_snp_c2_40637	chr02	39073604
solcap_snp_c2_40638	chr02	39073798
solcap_snp_c2_42132	chr02	39144889
solcap_snp_c2_42133	chr02	39144899
solcap_snp_c2_42126	chr02	39369211
solcap_snp_c2_42127	chr02	39369313
solcap_snp_c2_42128	chr02	39369457
solcap_snp_c2_42129	chr02	39369471
solcap_snp_c2_42130	chr02	39370219
solcap_snp_c2_25766	chr02	39593338
solcap_snp_c1_8091	chr02	39718023
solcap_snp_c1_8113	chr02	39934251
solcap_snp_c1_8118	chr02	39940755
solcap_snp_c1_8125	chr02	39969910
solcap_snp_c1_8127	chr02	40053236
solcap_snp_c2_25896	chr02	40132479
solcap_snp_c2_25897	chr02	40132605
solcap_snp_c2_25179	chr02	40294533
solcap_snp_c1_7964	chr02	40295082
solcap_snp_c1_7963	chr02	40295371
solcap_snp_c1_7915	chr02	40767958
solcap_snp_c1_7912	chr02	40804323
solcap_snp_c1_7957	chr02	40896280
solcap_snp_c2_7501	chr02	40989011
solcap_snp_c2_7506	chr02	41047745
solcap_snp_c2_7529	chr02	41088098
solcap_snp_c2_7549	chr02	41348074
solcap_snp_c2_7555	chr02	41356869
solcap_snp_c2_7556	chr02	41356967
solcap_snp_c2_7557	chr02	41356974
solcap_snp_c2_7558	chr02	41357618
solcap_snp_c2_7559	chr02	41357648
solcap_snp_c2_7560	chr02	41359045
solcap_snp_c2_7565	chr02	41368249
solcap_snp_c2_7632	chr02	41637559
solcap_snp_c1_2632	chr02	41745346
solcap_snp_c1_2640	chr02	41814861
solcap_snp_c1_2641	chr02	41814873
solcap_snp_c1_2653	chr02	41904235
solcap_snp_c1_2656	chr02	41911252
solcap_snp_c1_2657	chr02	41911264
solcap_snp_c1_2658	chr02	41911481
solcap_snp_c1_2574	chr02	42014714
solcap_snp_c2_7401	chr02	42082955
solcap_snp_c2_7424	chr02	42178921
solcap_snp_c1_2587	chr02	42179952
solcap_snp_c2_7426	chr02	42180125
solcap_snp_c1_16542	chr02	42320744
solcap_snp_c2_57421	chr02	42320746
solcap_snp_c1_16540	chr02	42320752
solcap_snp_c1_15746	chr02	42346319
solcap_snp_c2_22939	chr02	42474431
solcap_snp_c2_22919	chr02	42536778
solcap_snp_c1_7346	chr02	42597150
solcap_snp_c1_7342	chr02	42645671
solcap_snp_c1_7341	chr02	42657363
solcap_snp_c2_22894	chr02	42660643
solcap_snp_c2_22853	chr02	42733475
solcap_snp_c1_7325	chr02	42764457
solcap_snp_c1_7281	chr02	43112392
solcap_snp_c2_27216	chr02	43804889
solcap_snp_c2_27218	chr02	43809958
solcap_snp_c2_27372	chr02	44159208
solcap_snp_c2_27268	chr02	44458190
solcap_snp_c2_27269	chr02	44458217
solcap_snp_c2_27270	chr02	44458261
solcap_snp_c2_27271	chr02	44458744
solcap_snp_c2_43350	chr02	44773246
solcap_snp_c2_43348	chr02	44773405
solcap_snp_c1_12771	chr02	44810486
solcap_snp_c2_43408	chr02	44944694
solcap_snp_c1_12509	chr02	45147257
solcap_snp_c2_42570	chr02	45147540
solcap_snp_c2_14980	chr02	45458636
solcap_snp_c2_14981	chr02	45458750
solcap_snp_c1_4826	chr02	45458975
solcap_snp_c2_14985	chr02	45460986
solcap_snp_c2_14989	chr02	45461381
solcap_snp_c1_4847	chr02	45616777
solcap_snp_c2_15018	chr02	45618397
solcap_snp_c2_15021	chr02	45618817
solcap_snp_c1_4849	chr02	45619058
solcap_snp_c1_4850	chr02	45619076
solcap_snp_c2_15040	chr02	45649739
solcap_snp_c2_15042	chr02	45652453
solcap_snp_c2_15043	chr02	45652583
solcap_snp_c2_15044	chr02	45652664
solcap_snp_c2_15045	chr02	45652812
solcap_snp_c2_15046	chr02	45652911
solcap_snp_c2_15047	chr02	45652977
solcap_snp_c2_15065	chr02	45694416
solcap_snp_c1_4860	chr02	45695531
solcap_snp_c2_15066	chr02	45695537
solcap_snp_c2_15067	chr02	45695588
solcap_snp_c2_15070	chr02	45695772
solcap_snp_c1_4873	chr02	45744472
solcap_snp_c1_4881	chr02	45756358
solcap_snp_c1_7873	chr02	46195190
solcap_snp_c1_7872	chr02	46195203
solcap_snp_c1_7871	chr02	46195322
solcap_snp_c1_7869	chr02	46195418
solcap_snp_c1_7867	chr02	46196337
solcap_snp_c1_7848	chr02	46291602
solcap_snp_c2_24869	chr02	46387242
solcap_snp_c2_47227	chr02	46986482
solcap_snp_c2_47163	chr02	47119850
solcap_snp_c2_47196	chr02	47137398
solcap_snp_c2_47199	chr02	47137638
solcap_snp_c2_47202	chr02	47142731
solcap_snp_c2_35810	chr02	47223807
solcap_snp_c2_35686	chr02	47324048
solcap_snp_c2_35689	chr02	47324246
solcap_snp_c2_35690	chr02	47324335
solcap_snp_c2_35691	chr02	47324387
solcap_snp_c2_35693	chr02	47325275
solcap_snp_c2_35694	chr02	47325484
solcap_snp_c2_35695	chr02	47325502
solcap_snp_c2_35697	chr02	47325613
solcap_snp_c2_35698	chr02	47326485
solcap_snp_c2_35700	chr02	47326606
solcap_snp_c2_35701	chr02	47327434
solcap_snp_c2_35702	chr02	47327523
solcap_snp_c2_35704	chr02	47327530
solcap_snp_c2_35705	chr02	47327646
solcap_snp_c1_11458	chr02	47625735
solcap_snp_c1_11459	chr02	47625747
solcap_snp_c2_38552	chr02	47627484
solcap_snp_c2_38553	chr02	47627520
solcap_snp_c2_38555	chr02	47627703
solcap_snp_c1_5924	chr02	47712488
solcap_snp_c1_5909	chr02	47995095
solcap_snp_c1_5908	chr02	47995191
solcap_snp_c1_5931	chr02	48498156
solcap_snp_c2_36264	chr03	366332
solcap_snp_c2_36232	chr03	419098
solcap_snp_c2_36231	chr03	419123
solcap_snp_c1_10858	chr03	454269
solcap_snp_c2_36228	chr03	468838
solcap_snp_c2_43470	chr03	659121
solcap_snp_c1_12821	chr03	859369
solcap_snp_c1_12825	chr03	872029
solcap_snp_c2_51390	chr03	982932
solcap_snp_c2_51389	chr03	983008
solcap_snp_c2_54286	chr03	1267563
solcap_snp_c2_54288	chr03	1269875
solcap_snp_c2_54290	chr03	1272794
solcap_snp_c1_15782	chr03	1276837
solcap_snp_c1_15783	chr03	1276863
solcap_snp_c2_52800	chr03	1536781
solcap_snp_c2_52806	chr03	1541622
solcap_snp_c2_52809	chr03	1575045
solcap_snp_c2_52811	chr03	1580212
solcap_snp_c2_52813	chr03	1611409
solcap_snp_c2_52815	chr03	1612323
solcap_snp_c2_17218	chr03	1954563
solcap_snp_c1_15839	chr03	2390429
solcap_snp_c2_50372	chr03	2524231
solcap_snp_c1_14813	chr03	2565354
solcap_snp_c2_16682	chr03	3014439
solcap_snp_c2_16681	chr03	3014454
solcap_snp_c2_16680	chr03	3014625
solcap_snp_c2_16679	chr03	3014691
solcap_snp_c2_16678	chr03	3014811
solcap_snp_c2_16677	chr03	3014826
solcap_snp_c2_16676	chr03	3014973
solcap_snp_c2_16675	chr03	3015066
solcap_snp_c1_5400	chr03	3107887
solcap_snp_c1_5388	chr03	3161621
solcap_snp_c2_16571	chr03	3672939
solcap_snp_c2_16567	chr03	3673234
solcap_snp_c1_13059	chr03	4234685
solcap_snp_c2_44361	chr03	4378373
solcap_snp_c1_13052	chr03	4382671
solcap_snp_c1_12182	chr03	4446760
solcap_snp_c2_52467	chr03	4670814
solcap_snp_c1_15333	chr03	4732420
solcap_snp_c1_8970	chr03	5430309
solcap_snp_c1_8968	chr03	5430430
solcap_snp_c2_29450	chr03	5448586
solcap_snp_c2_29441	chr03	5580430
solcap_snp_c1_8974	chr03	5657114
solcap_snp_c2_50634	chr03	5741725
solcap_snp_c2_36463	chr03	38085008
solcap_snp_c2_36466	chr03	38141607
solcap_snp_c2_36468	chr03	38153740
solcap_snp_c2_36469	chr03	38175099
solcap_snp_c1_10879	chr03	38177443
solcap_snp_c1_10885	chr03	38315031
solcap_snp_c1_11350	chr03	38435099
solcap_snp_c2_38047	chr03	38662974
solcap_snp_c2_38058	chr03	38756280
solcap_snp_c2_38068	chr03	38758796
solcap_snp_c2_48381	chr03	39198462
solcap_snp_c2_48378	chr03	39198646
solcap_snp_c1_14316	chr03	39221780
solcap_snp_c2_48372	chr03	39255217
solcap_snp_c2_48370	chr03	39255317
solcap_snp_c2_48369	chr03	39257162
solcap_snp_c2_48368	chr03	39257271
solcap_snp_c2_48367	chr03	39257352
solcap_snp_c2_48366	chr03	39257411
solcap_snp_c2_48365	chr03	39257459
solcap_snp_c2_48364	chr03	39257577
solcap_snp_c2_48363	chr03	39257702
solcap_snp_c1_14315	chr03	39258166
solcap_snp_c2_48362	chr03	39258512
solcap_snp_c2_48360	chr03	39259017
solcap_snp_c2_48359	chr03	39259070
solcap_snp_c2_48390	chr03	39312768
solcap_snp_c2_48389	chr03	39312775
solcap_snp_c2_48388	chr03	39313859
solcap_snp_c2_48386	chr03	39314332
solcap_snp_c2_48385	chr03	39314387
solcap_snp_c2_57010	chr03	39584588
solcap_snp_c2_37993	chr03	40024360
solcap_snp_c2_38004	chr03	40102342
solcap_snp_c1_16679	chr03	40197844
solcap_snp_c1_11339	chr03	40339071
solcap_snp_c2_42306	chr03	41324382
solcap_snp_c2_16746	chr03	41496608
solcap_snp_c2_42312	chr03	41530089
solcap_snp_c2_24983	chr03	41645779
solcap_snp_c1_7882	chr03	41651732
solcap_snp_c2_57360	chr03	41778945
solcap_snp_c2_57354	chr03	41779526
solcap_snp_c2_57349	chr03	41780626
solcap_snp_c1_6869	chr03	41992129
solcap_snp_c1_6875	chr03	41994529
solcap_snp_c1_6851	chr03	42057000
solcap_snp_c1_6853	chr03	42154551
solcap_snp_c1_6864	chr03	42289087
solcap_snp_c1_9153	chr03	42943917
solcap_snp_c1_9161	chr03	43024161
solcap_snp_c2_46592	chr03	43224595
solcap_snp_c2_45698	chr03	43326301
solcap_snp_c2_45699	chr03	43326576
solcap_snp_c2_45700	chr03	43326700
solcap_snp_c2_45701	chr03	43326802
solcap_snp_c2_45702	chr03	43326959
solcap_snp_c2_45703	chr03	43326982
solcap_snp_c1_13847	chr03	43465296
solcap_snp_c1_13843	chr03	43469293
solcap_snp_c2_46605	chr03	43497910
solcap_snp_c2_46604	chr03	43497970
solcap_snp_c2_46603	chr03	43498325
solcap_snp_c1_4444	chr03	43602976
solcap_snp_c2_13821	chr03	43631694
solcap_snp_c2_13825	chr03	43632258
solcap_snp_c2_13798	chr03	43859960
solcap_snp_c2_17581	chr03	44090353
solcap_snp_c2_17552	chr03	44178120
solcap_snp_c1_5766	chr03	44217284
solcap_snp_c2_20347	chr03	44336061
solcap_snp_c1_6348	chr03	44344381
solcap_snp_c1_16094	chr03	44510670
solcap_snp_c2_55471	chr03	44512686
solcap_snp_c2_55465	chr03	44517478
solcap_snp_c1_6349	chr03	44675684
solcap_snp_c1_6352	chr03	44751875
solcap_snp_c1_6355	chr03	44752567
solcap_snp_c2_20333	chr03	44828352
solcap_snp_c1_6398	chr03	45002749
solcap_snp_c1_6411	chr03	45061263
solcap_snp_c1_6425	chr03	45121807
solcap_snp_c2_20433	chr03	45302180
solcap_snp_c2_55276	chr03	45385967
solcap_snp_c2_55277	chr03	45385984
solcap_snp_c2_55278	chr03	45386022
solcap_snp_c2_55279	chr03	45386107
solcap_snp_c2_55280	chr03	45386311
solcap_snp_c2_55283	chr03	45388663
solcap_snp_c2_55285	chr03	45388939
solcap_snp_c1_8069	chr03	45478753
solcap_snp_c2_25654	chr03	45603662
solcap_snp_c2_25653	chr03	45603698
solcap_snp_c1_8058	chr03	45686495
solcap_snp_c1_8036	chr03	45805462
solcap_snp_c2_25560	chr03	45904981
solcap_snp_c2_25662	chr03	45979293
solcap_snp_c2_2137	chr03	46265419
solcap_snp_c2_2138	chr03	46265431
solcap_snp_c1_526	chr03	46395963
solcap_snp_c2_57860	chr03	46423001
solcap_snp_c2_57863	chr03	46423284
solcap_snp_c2_57864	chr03	46423292
solcap_snp_c2_57865	chr03	46423346
solcap_snp_c1_3638	chr03	46475259
solcap_snp_c1_3637	chr03	46475610
solcap_snp_c2_11224	chr03	46481324
solcap_snp_c1_9025	chr03	46923611
solcap_snp_c1_9014	chr03	47073242
solcap_snp_c2_29646	chr03	47075794
solcap_snp_c2_29645	chr03	47075795
solcap_snp_c2_29643	chr03	47076266
solcap_snp_c2_29639	chr03	47076714
solcap_snp_c2_54785	chr03	47137231
solcap_snp_c1_8998	chr03	47331243
solcap_snp_c2_29678	chr03	47553804
solcap_snp_c2_45914	chr03	47769763
solcap_snp_c2_53699	chr03	48017163
solcap_snp_c2_55072	chr03	48087983
solcap_snp_c2_20069	chr03	48471111
solcap_snp_c2_20077	chr03	48482692
solcap_snp_c2_20113	chr03	48729670
solcap_snp_c2_20117	chr03	48737479
solcap_snp_c2_20124	chr03	48747525
solcap_snp_c2_20170	chr03	48911771
solcap_snp_c2_20175	chr03	48939759
solcap_snp_c2_20176	chr03	48939821
solcap_snp_c2_20178	chr03	48943709
solcap_snp_c2_20179	chr03	48943944
solcap_snp_c2_20227	chr03	49231930
solcap_snp_c1_6332	chr03	49245954
solcap_snp_c2_20259	chr03	49317882
solcap_snp_c2_20273	chr03	49358645
solcap_snp_c2_20274	chr03	49358697
solcap_snp_c2_20282	chr03	49393157
solcap_snp_c2_20283	chr03	49393263
solcap_snp_c2_20284	chr03	49393264
solcap_snp_c2_20285	chr03	49393382
solcap_snp_c2_20286	chr03	49393415
solcap_snp_c1_5774	chr03	49941568
solcap_snp_c2_58296	chr03	50294881
solcap_snp_c2_1616	chr03	50350319
solcap_snp_c2_1579	chr03	50455611
solcap_snp_c2_1567	chr03	50490035
solcap_snp_c2_1560	chr03	50564010
solcap_snp_c2_1556	chr03	50573479
solcap_snp_c2_1545	chr03	50637438
solcap_snp_c1_378	chr03	50686715
solcap_snp_c2_1533	chr03	50688268
solcap_snp_c1_432	chr03	51038140
solcap_snp_c2_1835	chr03	51091650
solcap_snp_c2_1813	chr03	51282166
solcap_snp_c2_1724	chr03	51404231
solcap_snp_c2_1723	chr03	51404258
solcap_snp_c2_1722	chr03	51404309
solcap_snp_c2_1720	chr03	51404520
solcap_snp_c2_1719	chr03	51404549
solcap_snp_c2_1718	chr03	51404622
solcap_snp_c2_1688	chr03	51474620
solcap_snp_c1_398	chr03	51601574
solcap_snp_c2_1844	chr03	51723928
solcap_snp_c2_47583	chr03	51936288
solcap_snp_c2_47510	chr03	51972224
solcap_snp_c1_4504	chr03	52406152
solcap_snp_c1_4509	chr03	52406533
solcap_snp_c2_13987	chr03	52483910
solcap_snp_c1_4519	chr03	52486441
solcap_snp_c2_14017	chr03	52546341
solcap_snp_c1_4542	chr03	52584809
solcap_snp_c2_14064	chr03	52657949
solcap_snp_c2_14155	chr03	52909720
solcap_snp_c1_4576	chr03	53162415
solcap_snp_c1_4577	chr03	53162686
solcap_snp_c2_14258	chr03	53203226
solcap_snp_c2_17649	chr03	53227603
solcap_snp_c2_17648	chr03	53227622
solcap_snp_c2_17646	chr03	53228507
solcap_snp_c2_17644	chr03	53228558
solcap_snp_c1_16234	chr03	53270167
solcap_snp_c2_55882	chr03	53272697
solcap_snp_c2_55885	chr03	53279728
solcap_snp_c2_17631	chr03	53309062
solcap_snp_c1_5794	chr03	53314079
solcap_snp_c2_57259	chr03	53421860
solcap_snp_c2_57260	chr03	53421920
solcap_snp_c2_57254	chr03	53433832
solcap_snp_c2_57256	chr03	53434069
solcap_snp_c2_57257	chr03	53434144
solcap_snp_c2_57258	chr03	53434206
solcap_snp_c1_16513	chr03	53436559
solcap_snp_c2_57263	chr03	53439319
solcap_snp_c1_5796	chr03	53526715
solcap_snp_c2_17667	chr03	53549043
solcap_snp_c1_5799	chr03	53572209
solcap_snp_c1_5812	chr03	53665337
solcap_snp_c2_17737	chr03	53747981
solcap_snp_c2_47843	chr03	54141894
solcap_snp_c1_7132	chr03	54314873
solcap_snp_c1_7076	chr03	54368685
solcap_snp_c1_7078	chr03	54369094
solcap_snp_c1_7082	chr03	54373785
solcap_snp_c1_7096	chr03	54469809
solcap_snp_c2_22466	chr03	54580832
solcap_snp_c1_7111	chr03	54582047
solcap_snp_c1_7112	chr03	54582101
solcap_snp_c1_7115	chr03	54657023
solcap_snp_c2_18459	chr03	55067483
solcap_snp_c2_18268	chr03	55234591
solcap_snp_c2_18269	chr03	55234622
solcap_snp_c2_18270	chr03	55234645
solcap_snp_c2_18271	chr03	55234747
solcap_snp_c2_18272	chr03	55234798
solcap_snp_c2_18273	chr03	55235957
solcap_snp_c2_18308	chr03	55291392
solcap_snp_c1_5951	chr03	55454889
solcap_snp_c1_5955	chr03	55642414
solcap_snp_c1_5956	chr03	55642455
solcap_snp_c2_18428	chr03	55645038
solcap_snp_c2_18429	chr03	55645069
solcap_snp_c2_18457	chr03	55786270
solcap_snp_c2_18463	chr03	55816412
solcap_snp_c2_18482	chr03	55883276
solcap_snp_c1_5959	chr03	55905943
solcap_snp_c2_18502	chr03	55910650
solcap_snp_c2_18503	chr03	55910771
solcap_snp_c2_18504	chr03	55910974
solcap_snp_c2_18506	chr03	55911538
solcap_snp_c2_18507	chr03	55911715
solcap_snp_c2_53258	chr03	55985522
solcap_snp_c1_15547	chr03	55999347
solcap_snp_c2_26466	chr03	56390223
solcap_snp_c2_26454	chr03	56440455
solcap_snp_c2_26417	chr03	56573127
solcap_snp_c2_26403	chr03	56604220
solcap_snp_c2_26402	chr03	56604264
solcap_snp_c2_26398	chr03	56604634
solcap_snp_c2_26382	chr03	56661756
solcap_snp_c2_26376	chr03	56667078
solcap_snp_c2_26375	chr03	56672317
solcap_snp_c2_26320	chr03	56935521
solcap_snp_c2_429	chr03	57296129
solcap_snp_c2_422	chr03	57311835
solcap_snp_c2_400	chr03	57405135
solcap_snp_c1_108	chr03	57407195
solcap_snp_c2_397	chr03	57407387
solcap_snp_c2_394	chr03	57407502
solcap_snp_c2_392	chr03	57407570
solcap_snp_c2_391	chr03	57407696
solcap_snp_c2_390	chr03	57407744
solcap_snp_c2_387	chr03	57407879
solcap_snp_c2_328	chr03	57566842
solcap_snp_c2_326	chr03	57568936
solcap_snp_c2_325	chr03	57568965
solcap_snp_c2_324	chr03	57569155
solcap_snp_c1_97	chr03	57569263
solcap_snp_c2_323	chr03	57569521
solcap_snp_c2_322	chr03	57569599
solcap_snp_c2_308	chr03	57601387
solcap_snp_c2_245	chr03	57875508
solcap_snp_c2_185	chr03	58106851
solcap_snp_c2_149	chr03	58286131
solcap_snp_c2_148	chr03	58295011
solcap_snp_c2_133	chr03	58322172
solcap_snp_c1_58	chr03	58455206
solcap_snp_c1_38	chr03	58609665
solcap_snp_c1_36	chr03	58609796
solcap_snp_c2_86	chr03	58611092
solcap_snp_c2_85	chr03	58611143
solcap_snp_c2_68	chr03	58651016
solcap_snp_c1_26	chr03	58658366
solcap_snp_c2_616	chr03	58877163
solcap_snp_c1_151	chr03	58944486
solcap_snp_c2_164	chr03	59574996
solcap_snp_c2_578	chr03	59769294
solcap_snp_c2_9630	chr03	60491901
solcap_snp_c1_3193	chr03	60880131
solcap_snp_c2_9497	chr03	60937507
solcap_snp_c2_9498	chr03	60937578
solcap_snp_c2_9531	chr03	61035987
solcap_snp_c2_37146	chr03	61757458
solcap_snp_c2_37139	chr03	61794475
solcap_snp_c2_37137	chr03	61796656
solcap_snp_c2_37136	chr03	61796934
solcap_snp_c2_37123	chr03	61870684
solcap_snp_c2_37121	chr03	61872439
solcap_snp_c2_37120	chr03	61872441
solcap_snp_c2_37119	chr03	61874817
solcap_snp_c2_37118	chr03	61876342
solcap_snp_c2_37100	chr03	61998553
solcap_snp_c1_16472	chr03	62033001
solcap_snp_c2_56824	chr03	62269671
solcap_snp_c2_23511	chr04	17660
solcap_snp_c1_7574	chr04	117620
solcap_snp_c2_23593	chr04	635886
solcap_snp_c2_23596	chr04	641790
solcap_snp_c2_23600	chr04	656192
solcap_snp_c2_23601	chr04	656429
solcap_snp_c2_23602	chr04	656465
solcap_snp_c2_23603	chr04	658706
solcap_snp_c1_7568	chr04	659638
solcap_snp_c1_7569	chr04	660102
solcap_snp_c1_7570	chr04	663819
solcap_snp_c1_7571	chr04	663858
solcap_snp_c2_23611	chr04	745614
solcap_snp_c2_23619	chr04	769207
solcap_snp_c2_54381	chr04	856999
solcap_snp_c2_54382	chr04	857113
solcap_snp_c2_56990	chr04	1118401
solcap_snp_c2_54463	chr04	1195223
solcap_snp_c2_39322	chr04	1502121
solcap_snp_c2_39285	chr04	1520854
solcap_snp_c2_39282	chr04	1633476
solcap_snp_c2_39287	chr04	1684582
solcap_snp_c1_11626	chr04	1821002
solcap_snp_c1_13859	chr04	2032297
solcap_snp_c1_13860	chr04	2118607
solcap_snp_c1_11243	chr04	2207405
solcap_snp_c1_11242	chr04	2207457
solcap_snp_c2_37633	chr04	2207703
solcap_snp_c2_37631	chr04	2210334
solcap_snp_c2_50942	chr04	2572452
solcap_snp_c1_9084	chr04	2680042
solcap_snp_c2_29872	chr04	2714003
solcap_snp_c2_29828	chr04	2985847
solcap_snp_c2_29851	chr04	3127465
solcap_snp_c2_29850	chr04	3127475
solcap_snp_c1_16358	chr04	3240076
solcap_snp_c2_55065	chr04	3294734
solcap_snp_c1_13626	chr04	3500991
solcap_snp_c2_45927	chr04	3562172
solcap_snp_c2_31673	chr04	3805809
solcap_snp_c2_31688	chr04	3816447
solcap_snp_c2_31712	chr04	3872265
solcap_snp_c2_31713	chr04	3872267
solcap_snp_c2_31719	chr04	3903824
solcap_snp_c2_31720	chr04	3903850
solcap_snp_c1_9546	chr04	3905183
solcap_snp_c2_31732	chr04	3924918
solcap_snp_c2_31733	chr04	3926768
solcap_snp_c2_31734	chr04	3926879
solcap_snp_c2_7757	chr04	4023866
solcap_snp_c1_6898	chr04	4586164
solcap_snp_c2_21937	chr04	4587018
solcap_snp_c2_21934	chr04	4606550
solcap_snp_c2_21930	chr04	4770130
solcap_snp_c2_21915	chr04	4821112
solcap_snp_c1_6890	chr04	4832664
solcap_snp_c2_21896	chr04	4903359
solcap_snp_c2_21867	chr04	4948774
solcap_snp_c2_21847	chr04	5030164
solcap_snp_c2_21842	chr04	5046865
solcap_snp_c2_21914	chr04	5192938
solcap_snp_c2_21858	chr04	5205905
solcap_snp_c2_21839	chr04	5215800
solcap_snp_c1_16079	chr04	5435822
solcap_snp_c1_16080	chr04	5453095
solcap_snp_c2_51637	chr04	5488531
solcap_snp_c2_51638	chr04	5488574
solcap_snp_c2_51639	chr04	5488735
solcap_snp_c2_51641	chr04	5489011
solcap_snp_c1_15106	chr04	5513361
solcap_snp_c2_51647	chr04	5521580
solcap_snp_c2_51650	chr04	5603404
solcap_snp_c1_3740	chr04	6178872
solcap_snp_c1_3722	chr04	6202137
solcap_snp_c2_11571	chr04	6209862
solcap_snp_c2_11570	chr04	6210340
solcap_snp_c2_11569	chr04	6210370
solcap_snp_c2_11568	chr04	6210397
solcap_snp_c2_11564	chr04	6297654
solcap_snp_c2_11549	chr04	6380666
solcap_snp_c2_11534	chr04	6614553
solcap_snp_c1_3707	chr04	6717567
solcap_snp_c2_11491	chr04	6942764
solcap_snp_c2_11490	chr04	6958040
solcap_snp_c2_11489	chr04	6958720
solcap_snp_c2_11488	chr04	6958789
solcap_snp_c2_11487	chr04	6960381
solcap_snp_c2_11479	chr04	6978730
solcap_snp_c2_11435	chr04	7041420
solcap_snp_c2_11432	chr04	7099708
solcap_snp_c2_11427	chr04	7121345
solcap_snp_c2_11425	chr04	7122790
solcap_snp_c2_11516	chr04	7368483
solcap_snp_c2_48873	chr04	7521115
solcap_snp_c2_48871	chr04	7524216
solcap_snp_c2_48868	chr04	7546115
solcap_snp_c2_48867	chr04	7546220
solcap_snp_c2_48866	chr04	7546310
solcap_snp_c2_48864	chr04	7546471
solcap_snp_c2_48861	chr04	7547910
solcap_snp_c2_48854	chr04	7553892
solcap_snp_c2_39718	chr04	7898214
solcap_snp_c1_11723	chr04	7966239
solcap_snp_c1_11722	chr04	7966312
solcap_snp_c1_11709	chr04	8016002
solcap_snp_c1_11710	chr04	8016032
solcap_snp_c2_39606	chr04	8016281
solcap_snp_c2_39624	chr04	8060573
solcap_snp_c2_39590	chr04	8176305
solcap_snp_c2_39593	chr04	8209896
solcap_snp_c2_39594	chr04	8218291
solcap_snp_c2_39597	chr04	8218478
solcap_snp_c2_47320	chr04	8413993
solcap_snp_c2_42863	chr04	8712928
solcap_snp_c1_8353	chr04	9203540
solcap_snp_c1_8341	chr04	9262447
solcap_snp_c2_26771	chr04	9276117
solcap_snp_c2_26773	chr04	9276426
solcap_snp_c1_8344	chr04	9315557
solcap_snp_c2_26790	chr04	9520486
solcap_snp_c2_26791	chr04	9521322
solcap_snp_c2_26792	chr04	9523209
solcap_snp_c1_8346	chr04	9523734
solcap_snp_c1_8347	chr04	9523778
solcap_snp_c1_8348	chr04	9523808
solcap_snp_c2_26793	chr04	9524196
solcap_snp_c2_26794	chr04	9524367
solcap_snp_c2_26795	chr04	9524454
solcap_snp_c2_26796	chr04	9524541
solcap_snp_c2_26797	chr04	9524613
solcap_snp_c2_26800	chr04	9525295
solcap_snp_c2_26801	chr04	9525367
solcap_snp_c2_26802	chr04	9525557
solcap_snp_c2_26811	chr04	9588125
solcap_snp_c2_26812	chr04	9590925
solcap_snp_c2_26813	chr04	9592426
solcap_snp_c2_26814	chr04	9592552
solcap_snp_c2_26826	chr04	9648247
solcap_snp_c2_26832	chr04	9674525
solcap_snp_c2_26842	chr04	9747341
solcap_snp_c2_26843	chr04	9747383
solcap_snp_c2_26844	chr04	9749952
solcap_snp_c1_8354	chr04	9787340
solcap_snp_c2_26858	chr04	9810489
solcap_snp_c2_53784	chr04	9941194
solcap_snp_c2_53779	chr04	9941686
solcap_snp_c2_44601	chr04	10102877
solcap_snp_c2_44609	chr04	10132935
solcap_snp_c1_16258	chr04	10390793
solcap_snp_c2_31403	chr04	10567963
solcap_snp_c2_54077	chr04	10968547
solcap_snp_c2_54083	chr04	10969111
solcap_snp_c2_54090	chr04	10993507
solcap_snp_c1_16643	chr04	11108454
solcap_snp_c1_11135	chr04	11350257
solcap_snp_c2_51176	chr04	11654120
solcap_snp_c2_39856	chr04	50676447
solcap_snp_c2_39847	chr04	50884547
solcap_snp_c2_39848	chr04	50884571
solcap_snp_c1_11791	chr04	50922404
solcap_snp_c1_13396	chr04	51021590
solcap_snp_c1_6033	chr04	51165594
solcap_snp_c1_6036	chr04	51343345
solcap_snp_c2_19001	chr04	51407692
solcap_snp_c1_6037	chr04	51603036
solcap_snp_c1_6040	chr04	51642492
solcap_snp_c2_55710	chr04	51813823
solcap_snp_c2_54533	chr04	51913379
solcap_snp_c1_15762	chr04	52019130
solcap_snp_c2_54229	chr04	52033872
solcap_snp_c1_15760	chr04	52037629
solcap_snp_c2_56238	chr04	52463182
solcap_snp_c2_1508	chr04	52513480
solcap_snp_c2_1506	chr04	52534629
solcap_snp_c2_48694	chr04	52890220
solcap_snp_c2_48691	chr04	52949494
solcap_snp_c2_48692	chr04	52949504
solcap_snp_c2_48693	chr04	52951523
solcap_snp_c1_14397	chr04	52955196
solcap_snp_c1_14398	chr04	52955198
solcap_snp_c2_53566	chr04	53071653
solcap_snp_c2_45035	chr04	53671782
solcap_snp_c2_45034	chr04	53671822
solcap_snp_c2_45123	chr04	53994118
solcap_snp_c1_15513	chr04	54125991
solcap_snp_c1_15983	chr04	54396697
solcap_snp_c1_15982	chr04	54396852
solcap_snp_c1_15977	chr04	54419164
solcap_snp_c2_54887	chr04	54438748
solcap_snp_c1_15878	chr04	54674058
solcap_snp_c2_48810	chr04	55407627
solcap_snp_c2_48808	chr04	55441858
solcap_snp_c2_21974	chr04	56449719
solcap_snp_c2_21973	chr04	56549845
solcap_snp_c1_6905	chr04	56622443
solcap_snp_c2_52738	chr04	56954459
solcap_snp_c2_57884	chr04	57242937
solcap_snp_c1_16625	chr04	57243271
solcap_snp_c2_52884	chr04	57280595
solcap_snp_c2_52887	chr04	57284957
solcap_snp_c2_52890	chr04	57285169
solcap_snp_c2_52892	chr04	57298517
solcap_snp_c2_43987	chr04	57891085
solcap_snp_c1_12945	chr04	57899405
solcap_snp_c2_43998	chr04	57899561
solcap_snp_c2_43999	chr04	57899858
solcap_snp_c2_44000	chr04	57899966
solcap_snp_c1_10441	chr04	58117285
solcap_snp_c2_34948	chr04	58265704
solcap_snp_c2_34957	chr04	58441497
solcap_snp_c2_34958	chr04	58441701
solcap_snp_c2_34960	chr04	58442164
solcap_snp_c2_54335	chr04	58532735
solcap_snp_c2_36061	chr04	58752313
solcap_snp_c2_36027	chr04	58830957
solcap_snp_c1_10750	chr04	58836709
solcap_snp_c1_10751	chr04	58845309
solcap_snp_c2_36037	chr04	58868987
solcap_snp_c1_10762	chr04	58875538
solcap_snp_c2_36045	chr04	58910549
solcap_snp_c2_36053	chr04	58951832
solcap_snp_c2_36059	chr04	59097353
solcap_snp_c2_36060	chr04	59098892
solcap_snp_c2_55849	chr04	59150916
solcap_snp_c2_39810	chr04	59803234
solcap_snp_c2_39807	chr04	59803681
solcap_snp_c2_39802	chr04	59828873
solcap_snp_c1_11750	chr04	59828910
solcap_snp_c2_39801	chr04	59829020
solcap_snp_c2_39800	chr04	59829029
solcap_snp_c2_39817	chr04	60000008
solcap_snp_c2_39816	chr04	60000105
solcap_snp_c1_11758	chr04	60037750
solcap_snp_c2_51220	chr04	60133081
solcap_snp_c2_51244	chr04	60198048
solcap_snp_c2_51242	chr04	60206967
solcap_snp_c1_15012	chr04	60213972
solcap_snp_c2_51234	chr04	60254953
solcap_snp_c1_15006	chr04	60255822
solcap_snp_c2_51232	chr04	60256759
solcap_snp_c2_53548	chr04	60611728
solcap_snp_c1_11363	chr04	61102521
solcap_snp_c1_11356	chr04	61160138
solcap_snp_c1_11352	chr04	61194011
solcap_snp_c1_11391	chr04	61215427
solcap_snp_c2_38116	chr04	61284452
solcap_snp_c2_48310	chr04	61490468
solcap_snp_c2_48290	chr04	61541735
solcap_snp_c2_37472	chr04	62092684
solcap_snp_c1_11206	chr04	62135720
solcap_snp_c1_11211	chr04	62257382
solcap_snp_c1_9771	chr04	62423409
solcap_snp_c1_9769	chr04	62427371
solcap_snp_c2_32601	chr04	62597434
solcap_snp_c2_32600	chr04	62597664
solcap_snp_c2_32550	chr04	62752969
solcap_snp_c2_32543	chr04	62775952
solcap_snp_c2_50004	chr04	63017719
solcap_snp_c2_49997	chr04	63076109
solcap_snp_c2_39463	chr04	63406121
solcap_snp_c2_39480	chr04	63433340
solcap_snp_c1_11670	chr04	63515949
solcap_snp_c2_39437	chr04	63548207
solcap_snp_c2_39439	chr04	63558935
solcap_snp_c2_39443	chr04	63562121
solcap_snp_c2_39447	chr04	63659301
solcap_snp_c2_39448	chr04	63659421
solcap_snp_c2_39450	chr04	63664170
solcap_snp_c2_39453	chr04	63668434
solcap_snp_c2_43736	chr04	63845729
solcap_snp_c2_43722	chr04	64012524
solcap_snp_c2_43735	chr04	64055406
solcap_snp_c2_43743	chr04	64061387
solcap_snp_c2_43748	chr04	64087659
solcap_snp_c1_11639	chr04	64134829
solcap_snp_c2_39343	chr04	64206034
solcap_snp_c2_39342	chr04	64216808
solcap_snp_c2_39341	chr04	64216910
solcap_snp_c2_39333	chr04	64234719
solcap_snp_c2_39327	chr04	64275135
solcap_snp_c1_12564	chr04	64549009
solcap_snp_c2_21590	chr04	64758588
solcap_snp_c2_21581	chr04	64775857
solcap_snp_c2_21578	chr04	64775909
solcap_snp_c2_21577	chr04	64776004
solcap_snp_c2_21573	chr04	64781980
solcap_snp_c2_21572	chr04	64781984
solcap_snp_c1_6758	chr04	64867844
solcap_snp_c1_6749	chr04	64973061
solcap_snp_c1_6748	chr04	64996975
solcap_snp_c2_21479	chr04	65000546
solcap_snp_c2_21364	chr04	65301176
solcap_snp_c2_21363	chr04	65301179
solcap_snp_c1_8328	chr04	65577930
solcap_snp_c2_26731	chr04	65583822
solcap_snp_c2_26758	chr04	65600291
solcap_snp_c2_26675	chr04	65727042
solcap_snp_c2_26681	chr04	65750963
solcap_snp_c2_26688	chr04	65767269
solcap_snp_c1_8316	chr04	65802638
solcap_snp_c1_7990	chr04	65866827
solcap_snp_c2_25282	chr04	65867121
solcap_snp_c2_25283	chr04	65867228
solcap_snp_c2_25284	chr04	65872176
solcap_snp_c2_55796	chr04	65969881
solcap_snp_c2_55791	chr04	65970282
solcap_snp_c2_55789	chr04	65970382
solcap_snp_c2_55788	chr04	65970724
solcap_snp_c2_55786	chr04	65970827
solcap_snp_c2_55785	chr04	65970953
solcap_snp_c2_55784	chr04	65970986
solcap_snp_c2_55783	chr04	65971150
solcap_snp_c2_55782	chr04	65971159
solcap_snp_c2_55780	chr04	65971280
solcap_snp_c2_55777	chr04	65971441
solcap_snp_c2_55776	chr04	65971563
solcap_snp_c1_16191	chr04	65971751
solcap_snp_c2_55775	chr04	65972399
solcap_snp_c2_55774	chr04	65972478
solcap_snp_c2_55773	chr04	65972517
solcap_snp_c2_55772	chr04	65972586
solcap_snp_c2_55768	chr04	65972774
solcap_snp_c2_26712	chr04	66043528
solcap_snp_c2_26713	chr04	66043536
solcap_snp_c1_8319	chr04	66074599
solcap_snp_c2_26740	chr04	66204641
solcap_snp_c2_26741	chr04	66204701
solcap_snp_c2_26742	chr04	66204783
solcap_snp_c2_26743	chr04	66204806
solcap_snp_c2_26744	chr04	66212305
solcap_snp_c2_38556	chr04	66415083
solcap_snp_c2_38611	chr04	66650026
solcap_snp_c2_44640	chr04	66777995
solcap_snp_c1_13172	chr04	66920028
solcap_snp_c2_32056	chr04	67048197
solcap_snp_c2_32042	chr04	67130719
solcap_snp_c2_32036	chr04	67171309
solcap_snp_c1_9619	chr04	67248738
solcap_snp_c1_9614	chr04	67294193
solcap_snp_c1_9613	chr04	67294211
solcap_snp_c2_32099	chr04	67342310
solcap_snp_c2_54446	chr04	67422348
solcap_snp_c1_15237	chr04	67552618
solcap_snp_c2_52206	chr04	67567676
solcap_snp_c2_52205	chr04	67570682
solcap_snp_c2_52203	chr04	67585796
solcap_snp_c2_52202	chr04	67609888
solcap_snp_c2_52196	chr04	67631273
solcap_snp_c2_52195	chr04	67631327
solcap_snp_c2_19584	chr04	67766128
solcap_snp_c1_10435	chr04	67842288
solcap_snp_c2_34890	chr04	67953469
solcap_snp_c2_34877	chr04	67981001
solcap_snp_c2_34876	chr04	67981010
solcap_snp_c2_34875	chr04	67981117
solcap_snp_c2_34874	chr04	67981149
solcap_snp_c2_34873	chr04	67981400
solcap_snp_c2_34872	chr04	67981423
solcap_snp_c2_34870	chr04	67981538
solcap_snp_c2_34869	chr04	67981553
solcap_snp_c2_34868	chr04	67982840
solcap_snp_c2_34867	chr04	67982950
solcap_snp_c2_34866	chr04	67983036
solcap_snp_c2_34865	chr04	67983299
solcap_snp_c2_34864	chr04	67983402
solcap_snp_c1_10428	chr04	67984407
solcap_snp_c2_34863	chr04	67984659
solcap_snp_c2_34862	chr04	67984665
solcap_snp_c1_10425	chr04	67985135
solcap_snp_c1_10424	chr04	67985201
solcap_snp_c2_34861	chr04	67985836
solcap_snp_c2_34812	chr04	68141446
solcap_snp_c2_34937	chr04	68259021
solcap_snp_c1_3166	chr04	68439384
solcap_snp_c2_56837	chr04	68481475
solcap_snp_c1_13077	chr04	68865108
solcap_snp_c2_12981	chr04	69026707
solcap_snp_c2_12976	chr04	69050482
solcap_snp_c1_4180	chr04	69079236
solcap_snp_c2_12959	chr04	69138945
solcap_snp_c2_12958	chr04	69148562
solcap_snp_c2_12957	chr04	69148700
solcap_snp_c2_12956	chr04	69148721
solcap_snp_c2_12955	chr04	69148829
solcap_snp_c2_12953	chr04	69150093
solcap_snp_c2_12947	chr04	69185901
solcap_snp_c2_12945	chr04	69186102
solcap_snp_c2_12938	chr04	69206404
solcap_snp_c2_12936	chr04	69206746
solcap_snp_c1_4175	chr04	69209192
solcap_snp_c2_12930	chr04	69311500
solcap_snp_c2_12928	chr04	69322253
solcap_snp_c1_4172	chr04	69323144
solcap_snp_c1_4171	chr04	69336216
solcap_snp_c2_12924	chr04	69345026
solcap_snp_c2_12913	chr04	69391846
solcap_snp_c1_4162	chr04	69391945
solcap_snp_c2_12903	chr04	69415006
solcap_snp_c1_10167	chr04	70185081
solcap_snp_c1_10168	chr04	70185119
solcap_snp_c1_10169	chr04	70186406
solcap_snp_c1_10178	chr04	70199242
solcap_snp_c1_10179	chr04	70199251
solcap_snp_c1_10180	chr04	70199444
solcap_snp_c1_10181	chr04	70200587
solcap_snp_c2_34017	chr04	70201797
solcap_snp_c2_34019	chr04	70222194
solcap_snp_c1_10196	chr04	70365272
solcap_snp_c1_10202	chr04	70396887
solcap_snp_c1_13349	chr04	70589201
solcap_snp_c2_35959	chr04	70787279
solcap_snp_c2_35958	chr04	70787357
solcap_snp_c1_10679	chr04	70805587
solcap_snp_c1_10678	chr04	70805737
solcap_snp_c1_10677	chr04	70805773
solcap_snp_c1_10676	chr04	70807043
solcap_snp_c2_35944	chr04	70878898
solcap_snp_c2_35942	chr04	70878916
solcap_snp_c1_10670	chr04	70880221
solcap_snp_c1_10669	chr04	70880440
solcap_snp_c1_10668	chr04	70880906
solcap_snp_c1_10667	chr04	70880971
solcap_snp_c1_10715	chr04	70939324
solcap_snp_c2_35999	chr04	70939674
solcap_snp_c2_35998	chr04	70939686
solcap_snp_c2_35997	chr04	70941431
solcap_snp_c2_35996	chr04	70945073
solcap_snp_c1_10714	chr04	70953672
solcap_snp_c1_10713	chr04	70954545
solcap_snp_c1_10712	chr04	70954662
solcap_snp_c1_10711	chr04	70954731
solcap_snp_c1_3450	chr04	71076408
solcap_snp_c2_10820	chr04	71333000
solcap_snp_c2_10819	chr04	71335030
solcap_snp_c1_3557	chr04	71336662
solcap_snp_c1_3553	chr04	71359551
solcap_snp_c2_10802	chr04	71383390
solcap_snp_c2_10801	chr04	71383392
solcap_snp_c2_10800	chr04	71383501
solcap_snp_c2_10799	chr04	71383530
solcap_snp_c1_3545	chr04	71383982
solcap_snp_c2_10798	chr04	71384419
solcap_snp_c1_3544	chr04	71385536
solcap_snp_c2_10797	chr04	71387933
solcap_snp_c2_10771	chr04	71449817
solcap_snp_c2_10694	chr04	71588152
solcap_snp_c2_10693	chr04	71588170
solcap_snp_c1_3526	chr04	71589190
solcap_snp_c1_3525	chr04	71590312
solcap_snp_c2_10692	chr04	71591813
solcap_snp_c1_3522	chr04	71591902
solcap_snp_c2_10690	chr04	71592088
solcap_snp_c2_10688	chr04	71592216
solcap_snp_c2_10687	chr04	71592285
solcap_snp_c2_10686	chr04	71592367
solcap_snp_c2_10685	chr04	71592390
solcap_snp_c2_10681	chr04	71592572
solcap_snp_c1_3515	chr04	71593900
solcap_snp_c1_3514	chr04	71593930
solcap_snp_c2_10659	chr04	71638210
solcap_snp_c2_10658	chr04	71638309
solcap_snp_c2_10656	chr04	71654784
solcap_snp_c2_10618	chr04	71826211
solcap_snp_c2_10617	chr04	71826257
solcap_snp_c2_10616	chr04	71826356
solcap_snp_c2_10615	chr04	71826365
solcap_snp_c2_10614	chr04	71827521
solcap_snp_c2_10613	chr04	71827833
solcap_snp_c2_10612	chr04	71828638
solcap_snp_c1_3497	chr04	71854295
solcap_snp_c1_3495	chr04	71866559
solcap_snp_c1_3494	chr04	71868365
solcap_snp_c1_3484	chr04	71945107
solcap_snp_c2_10568	chr04	71954528
solcap_snp_c2_10567	chr04	71954567
solcap_snp_c2_10566	chr04	71954636
solcap_snp_c2_10565	chr04	71955746
solcap_snp_c2_10563	chr04	71956350
solcap_snp_c1_3478	chr04	71956738
solcap_snp_c1_3476	chr04	71957094
solcap_snp_c2_10548	chr04	72022392
solcap_snp_c2_10547	chr04	72022751
solcap_snp_c1_3462	chr04	72026868
solcap_snp_c1_3461	chr04	72026885
solcap_snp_c1_3458	chr04	72039377
solcap_snp_c2_10539	chr04	72039398
solcap_snp_c2_23776	chr05	65193
solcap_snp_c2_23780	chr05	65287
solcap_snp_c2_23803	chr05	71198
solcap_snp_c2_23804	chr05	71209
solcap_snp_c2_23643	chr05	159426
solcap_snp_c2_23669	chr05	190926
solcap_snp_c2_23678	chr05	224801
solcap_snp_c2_23717	chr05	291556
solcap_snp_c2_23728	chr05	325029
solcap_snp_c2_23729	chr05	325030
solcap_snp_c2_23735	chr05	388873
solcap_snp_c2_23737	chr05	389040
solcap_snp_c2_23738	chr05	389065
solcap_snp_c2_23739	chr05	389174
solcap_snp_c2_23740	chr05	389266
solcap_snp_c2_23741	chr05	389308
solcap_snp_c1_7621	chr05	391001
solcap_snp_c1_7622	chr05	391031
solcap_snp_c2_23743	chr05	391812
solcap_snp_c1_7624	chr05	412134
solcap_snp_c2_23828	chr05	694091
solcap_snp_c2_23829	chr05	694151
solcap_snp_c2_23830	chr05	694286
solcap_snp_c2_23831	chr05	694355
solcap_snp_c2_23832	chr05	694469
solcap_snp_c2_23833	chr05	694521
solcap_snp_c2_23834	chr05	694541
solcap_snp_c2_23835	chr05	694562
solcap_snp_c2_23836	chr05	694653
solcap_snp_c2_23841	chr05	703580
solcap_snp_c2_23842	chr05	705671
solcap_snp_c2_23843	chr05	705734
solcap_snp_c2_23845	chr05	705860
solcap_snp_c2_23846	chr05	727316
solcap_snp_c1_15684	chr05	1041105
solcap_snp_c2_40379	chr05	1091964
solcap_snp_c2_33598	chr05	1245711
solcap_snp_c2_33508	chr05	1400727
solcap_snp_c2_33510	chr05	1401058
solcap_snp_c2_33511	chr05	1401063
solcap_snp_c2_33512	chr05	1401412
solcap_snp_c2_33513	chr05	1401419
solcap_snp_c2_33514	chr05	1408684
solcap_snp_c2_33515	chr05	1411584
solcap_snp_c2_33516	chr05	1413720
solcap_snp_c2_33517	chr05	1413732
solcap_snp_c2_33518	chr05	1413816
solcap_snp_c2_33519	chr05	1413897
solcap_snp_c2_33520	chr05	1413918
solcap_snp_c2_33521	chr05	1413945
solcap_snp_c2_33522	chr05	1414020
solcap_snp_c2_33532	chr05	1425058
solcap_snp_c2_33534	chr05	1437827
solcap_snp_c2_33535	chr05	1437829
solcap_snp_c1_10042	chr05	1438051
solcap_snp_c2_33536	chr05	1438486
solcap_snp_c2_33537	chr05	1438693
solcap_snp_c2_33545	chr05	1505744
solcap_snp_c2_33563	chr05	1596529
solcap_snp_c2_52061	chr05	1832192
solcap_snp_c2_52066	chr05	1847520
solcap_snp_c2_52067	chr05	1847556
solcap_snp_c2_52069	chr05	1847677
solcap_snp_c2_52070	chr05	1853441
solcap_snp_c2_52084	chr05	1902218
solcap_snp_c2_11605	chr05	1957512
solcap_snp_c2_11604	chr05	1957584
solcap_snp_c2_11766	chr05	1996437
solcap_snp_c2_11758	chr05	1997209
solcap_snp_c2_11747	chr05	2037634
solcap_snp_c2_11734	chr05	2078006
solcap_snp_c2_11726	chr05	2079223
solcap_snp_c2_11725	chr05	2079802
solcap_snp_c2_11712	chr05	2149871
solcap_snp_c2_11707	chr05	2214471
solcap_snp_c2_11696	chr05	2261080
solcap_snp_c2_11695	chr05	2261237
solcap_snp_c2_11685	chr05	2288291
solcap_snp_c1_3767	chr05	2781880
solcap_snp_c1_15618	chr05	3051266
solcap_snp_c1_3840	chr05	3134967
solcap_snp_c1_3803	chr05	3585641
solcap_snp_c1_3795	chr05	3702171
solcap_snp_c2_11925	chr05	3708757
solcap_snp_c2_11924	chr05	3708760
solcap_snp_c1_3793	chr05	3709723
solcap_snp_c2_11923	chr05	3710249
solcap_snp_c2_11829	chr05	4041510
solcap_snp_c2_22986	chr05	4279075
solcap_snp_c2_22957	chr05	4418403
solcap_snp_c2_22959	chr05	4434048
solcap_snp_c2_23052	chr05	4906728
solcap_snp_c1_7372	chr05	4921752
solcap_snp_c2_23055	chr05	4936332
solcap_snp_c2_23056	chr05	4936615
solcap_snp_c2_50311	chr05	5039916
solcap_snp_c2_50309	chr05	5050162
solcap_snp_c2_50306	chr05	5051710
solcap_snp_c1_14802	chr05	5051766
solcap_snp_c2_50305	chr05	5052466
solcap_snp_c1_14801	chr05	5053838
solcap_snp_c2_50304	chr05	5055627
solcap_snp_c2_50303	chr05	5055684
solcap_snp_c2_50302	chr05	5055763
solcap_snp_c2_50301	chr05	5055948
solcap_snp_c2_50300	chr05	5055959
solcap_snp_c2_50299	chr05	5056005
solcap_snp_c2_50298	chr05	5056010
solcap_snp_c2_54035	chr05	5368339
solcap_snp_c2_12510	chr05	5506532
solcap_snp_c2_51464	chr05	5533993
solcap_snp_c2_51478	chr05	5573355
solcap_snp_c2_51473	chr05	5574612
solcap_snp_c2_51470	chr05	5574733
solcap_snp_c1_14836	chr05	5683864
solcap_snp_c1_14839	chr05	5692751
solcap_snp_c1_14840	chr05	5692769
solcap_snp_c2_50429	chr05	5692904
solcap_snp_c2_50430	chr05	5692913
solcap_snp_c1_14841	chr05	5693667
solcap_snp_c2_50421	chr05	5791983
solcap_snp_c2_47643	chr05	5919249
solcap_snp_c2_47644	chr05	5920033
solcap_snp_c2_47646	chr05	5921198
solcap_snp_c2_47647	chr05	5926421
solcap_snp_c2_47648	chr05	5932020
solcap_snp_c2_47649	chr05	5932061
solcap_snp_c2_47658	chr05	5945550
solcap_snp_c2_47659	chr05	5946439
solcap_snp_c2_47660	chr05	5946481
solcap_snp_c2_47663	chr05	5946946
solcap_snp_c2_47597	chr05	5952162
solcap_snp_c1_14127	chr05	5967825
solcap_snp_c2_47607	chr05	5972364
solcap_snp_c2_47611	chr05	5972571
solcap_snp_c2_52436	chr05	6147926
solcap_snp_c2_52455	chr05	6204099
solcap_snp_c2_47284	chr05	6354190
solcap_snp_c2_47300	chr05	6395068
solcap_snp_c2_47301	chr05	6395149
solcap_snp_c2_47302	chr05	6397015
solcap_snp_c2_47303	chr05	6397142
solcap_snp_c2_38221	chr05	6497821
solcap_snp_c2_38197	chr05	6567537
solcap_snp_c2_38193	chr05	6583448
solcap_snp_c2_38167	chr05	6625290
solcap_snp_c2_38163	chr05	6626727
solcap_snp_c2_38229	chr05	6772274
solcap_snp_c2_55452	chr05	6965234
solcap_snp_c2_45522	chr05	7200278
solcap_snp_c2_45517	chr05	7332437
solcap_snp_c2_37719	chr05	7675049
solcap_snp_c2_37697	chr05	7717307
solcap_snp_c2_37692	chr05	7741542
solcap_snp_c1_11267	chr05	7832577
solcap_snp_c2_37092	chr05	8024220
solcap_snp_c2_37066	chr05	8139386
solcap_snp_c1_11078	chr05	8166198
solcap_snp_c1_11088	chr05	8360537
solcap_snp_c2_48021	chr05	8660304
solcap_snp_c1_15292	chr05	8795719
solcap_snp_c2_43523	chr05	9134438
solcap_snp_c2_43515	chr05	9144438
solcap_snp_c2_43506	chr05	9147230
solcap_snp_c2_43504	chr05	9147460
solcap_snp_c2_55894	chr05	9558289
solcap_snp_c2_55899	chr05	9639945
solcap_snp_c2_55902	chr05	9640047
solcap_snp_c2_55903	chr05	9640075
solcap_snp_c2_55905	chr05	9640118
solcap_snp_c2_55906	chr05	9640678
solcap_snp_c1_14645	chr05	10031602
solcap_snp_c2_32877	chr05	10273830
solcap_snp_c2_32854	chr05	10418984
solcap_snp_c2_32828	chr05	10543629
solcap_snp_c2_50176	chr05	43712364
solcap_snp_c2_48355	chr05	44271960
solcap_snp_c1_16071	chr05	44448583
solcap_snp_c1_15965	chr05	44622109
solcap_snp_c1_14913	chr05	44713672
solcap_snp_c2_44373	chr05	44945062
solcap_snp_c2_44375	chr05	44945205
solcap_snp_c2_44385	chr05	44973442
solcap_snp_c1_13068	chr05	45125984
solcap_snp_c2_40803	chr05	45359901
solcap_snp_c1_12005	chr05	45542551
solcap_snp_c1_12003	chr05	45542672
solcap_snp_c2_40776	chr05	45544150
solcap_snp_c2_40775	chr05	45544180
solcap_snp_c1_11998	chr05	45545592
solcap_snp_c1_11997	chr05	45545670
solcap_snp_c1_11996	chr05	45545694
solcap_snp_c1_12016	chr05	45546170
solcap_snp_c1_12015	chr05	45546177
solcap_snp_c2_40821	chr05	45546574
solcap_snp_c1_12014	chr05	45598757
solcap_snp_c2_50840	chr05	45880548
solcap_snp_c2_50838	chr05	45880602
solcap_snp_c2_16446	chr05	45910606
solcap_snp_c2_51591	chr05	45992075
solcap_snp_c2_51578	chr05	46046095
solcap_snp_c2_49651	chr05	46288575
solcap_snp_c2_49653	chr05	46323215
solcap_snp_c2_49820	chr05	46363167
solcap_snp_c1_14684	chr05	46454617
solcap_snp_c2_49832	chr05	46553296
solcap_snp_c2_46941	chr05	46891499
solcap_snp_c1_12424	chr05	47001476
solcap_snp_c2_42390	chr05	47050080
solcap_snp_c1_12414	chr05	47122961
solcap_snp_c2_42374	chr05	47146520
solcap_snp_c1_12449	chr05	47308843
solcap_snp_c1_12448	chr05	47308888
solcap_snp_c1_12447	chr05	47309125
solcap_snp_c1_12446	chr05	47309135
solcap_snp_c1_12445	chr05	47309196
solcap_snp_c1_12444	chr05	47309576
solcap_snp_c1_12442	chr05	47309777
solcap_snp_c1_12440	chr05	47309920
solcap_snp_c1_12439	chr05	47324660
solcap_snp_c1_12419	chr05	47340872
solcap_snp_c1_16067	chr05	47387016
solcap_snp_c2_49140	chr05	47432612
solcap_snp_c2_49128	chr05	47454994
solcap_snp_c2_49147	chr05	47506482
solcap_snp_c2_49116	chr05	47535067
solcap_snp_c2_49117	chr05	47557989
solcap_snp_c2_49124	chr05	47573236
solcap_snp_c2_10311	chr05	47710741
solcap_snp_c2_10409	chr05	47747659
solcap_snp_c2_10410	chr05	47747766
solcap_snp_c2_10411	chr05	47747794
solcap_snp_c1_3371	chr05	47800112
solcap_snp_c1_3375	chr05	47886732
solcap_snp_c1_3392	chr05	47991614
solcap_snp_c1_3393	chr05	47991663
solcap_snp_c2_10287	chr05	48250197
solcap_snp_c2_10338	chr05	48410057
solcap_snp_c2_10339	chr05	48410135
solcap_snp_c2_10341	chr05	48410294
solcap_snp_c2_10358	chr05	48541183
solcap_snp_c2_10394	chr05	48582519
solcap_snp_c2_54372	chr05	48878549
solcap_snp_c2_54371	chr05	48887625
solcap_snp_c2_54370	chr05	48887667
solcap_snp_c2_54368	chr05	48888060
solcap_snp_c2_54365	chr05	48888480
solcap_snp_c2_54364	chr05	48888489
solcap_snp_c2_42542	chr05	49045619
solcap_snp_c2_42405	chr05	49092589
solcap_snp_c1_12454	chr05	49094113
solcap_snp_c2_42406	chr05	49094498
solcap_snp_c2_42450	chr05	49177407
solcap_snp_c2_42451	chr05	49177458
solcap_snp_c2_42452	chr05	49177482
solcap_snp_c2_42453	chr05	49179471
solcap_snp_c2_42455	chr05	49179532
solcap_snp_c2_42461	chr05	49185487
solcap_snp_c2_42473	chr05	49240696
solcap_snp_c2_42475	chr05	49242992
solcap_snp_c2_42481	chr05	49246855
solcap_snp_c2_42495	chr05	49260635
solcap_snp_c2_55571	chr05	49356615
solcap_snp_c2_55239	chr05	49460622
solcap_snp_c2_55240	chr05	49467229
solcap_snp_c2_8356	chr05	49719416
solcap_snp_c2_8426	chr05	49736378
solcap_snp_c2_8427	chr05	49736422
solcap_snp_c2_8428	chr05	49736471
solcap_snp_c2_8430	chr05	49737704
solcap_snp_c2_8431	chr05	49737818
solcap_snp_c2_8473	chr05	49744187
solcap_snp_c1_2799	chr05	49778404
solcap_snp_c2_8240	chr05	49804489
solcap_snp_c2_8253	chr05	49835932
solcap_snp_c2_8254	chr05	49835986
solcap_snp_c2_8256	chr05	49836134
solcap_snp_c2_8270	chr05	49840687
solcap_snp_c2_8278	chr05	49851548
solcap_snp_c2_8295	chr05	49888144
solcap_snp_c2_8302	chr05	49908824
solcap_snp_c1_2820	chr05	50067596
solcap_snp_c1_2840	chr05	50246886
solcap_snp_c1_2865	chr05	50396941
solcap_snp_c2_8460	chr05	50479738
solcap_snp_c2_8507	chr05	50583686
solcap_snp_c2_8509	chr05	50583833
solcap_snp_c2_8510	chr05	50583895
solcap_snp_c2_8511	chr05	50583953
solcap_snp_c2_8512	chr05	50583991
solcap_snp_c2_8517	chr05	50584317
solcap_snp_c2_8519	chr05	50584455
solcap_snp_c2_8521	chr05	50584500
solcap_snp_c2_8522	chr05	50584727
solcap_snp_c2_8210	chr05	50922126
solcap_snp_c2_3603	chr05	51145330
solcap_snp_c1_1195	chr05	51435110
solcap_snp_c2_3512	chr05	51477749
solcap_snp_c1_1163	chr05	51588199
solcap_snp_c2_3452	chr05	51696835
[truncated: 2,315 more rows]

## Sheet: TableS5d_heterochromatin
SolCAP_SNP_ID	chr_v403	position
solcap_snp_c2_27877	chr01	6071374
solcap_snp_c2_27878	chr01	6071398
solcap_snp_c2_27879	chr01	6071498
solcap_snp_c2_27881	chr01	6071711
solcap_snp_c2_27882	chr01	6071776
solcap_snp_c2_27883	chr01	6071789
solcap_snp_c2_27885	chr01	6071917
solcap_snp_c2_27887	chr01	6142925
solcap_snp_c1_8606	chr01	6143327
solcap_snp_c2_27903	chr01	6295542
solcap_snp_c2_27900	chr01	6303560
solcap_snp_c2_27899	chr01	6303615
solcap_snp_c2_27894	chr01	6340020
solcap_snp_c1_8619	chr01	6529837
solcap_snp_c2_27918	chr01	6587872
solcap_snp_c2_48154	chr01	7165940
solcap_snp_c2_50011	chr01	7447081
solcap_snp_c2_50013	chr01	7447660
solcap_snp_c2_50014	chr01	7448477
solcap_snp_c2_52712	chr01	8645593
solcap_snp_c2_52709	chr01	8645709
solcap_snp_c2_52705	chr01	8653509
solcap_snp_c2_48549	chr01	10570836
solcap_snp_c2_48563	chr01	10573476
solcap_snp_c1_12858	chr01	11395918
solcap_snp_c2_56356	chr01	11737575
solcap_snp_c2_56359	chr01	11742717
solcap_snp_c1_16515	chr01	11769718
solcap_snp_c2_57284	chr01	11774418
solcap_snp_c2_45626	chr01	12000688
solcap_snp_c2_45625	chr01	12000832
solcap_snp_c2_45622	chr01	12005526
solcap_snp_c2_45637	chr01	12022163
solcap_snp_c2_53758	chr01	12841303
solcap_snp_c2_55008	chr01	12994277
solcap_snp_c2_53521	chr01	13266749
solcap_snp_c2_43984	chr01	13369757
solcap_snp_c1_12938	chr01	13392443
solcap_snp_c2_43970	chr01	13545189
solcap_snp_c2_43973	chr01	13546944
solcap_snp_c2_43978	chr01	13597181
solcap_snp_c1_8908	chr01	13655916
solcap_snp_c2_54355	chr01	13740819
solcap_snp_c2_54353	chr01	13747185
solcap_snp_c2_49867	chr01	16399217
solcap_snp_c2_57185	chr01	16912211
solcap_snp_c2_48568	chr01	17370636
solcap_snp_c2_48566	chr01	17381137
solcap_snp_c2_48565	chr01	17381140
solcap_snp_c1_8593	chr01	17664121
solcap_snp_c1_15521	chr01	18393787
solcap_snp_c2_53759	chr01	18753971
solcap_snp_c2_56842	chr01	18925584
solcap_snp_c2_56843	chr01	18925630
solcap_snp_c2_56844	chr01	18925794
solcap_snp_c1_16423	chr01	18927026
solcap_snp_c1_16425	chr01	18927247
solcap_snp_c1_15612	chr01	18998405
solcap_snp_c1_14664	chr01	19663894
solcap_snp_c2_49759	chr01	19666602
solcap_snp_c2_49758	chr01	19667145
solcap_snp_c2_49327	chr01	20414881
solcap_snp_c2_49328	chr01	20414889
solcap_snp_c2_49330	chr01	20420076
solcap_snp_c2_49331	chr01	20420103
solcap_snp_c2_49324	chr01	20548838
solcap_snp_c1_10139	chr01	22612965
solcap_snp_c1_5477	chr01	23656980
solcap_snp_c1_15876	chr01	24687642
solcap_snp_c2_54580	chr01	24697661
solcap_snp_c2_54581	chr01	24708276
solcap_snp_c2_55144	chr01	28116592
solcap_snp_c2_43643	chr01	29180791
solcap_snp_c1_7143	chr01	29676849
solcap_snp_c2_22549	chr01	29678334
solcap_snp_c2_22546	chr01	29679850
solcap_snp_c2_22545	chr01	29679855
solcap_snp_c1_7142	chr01	29683870
solcap_snp_c2_22531	chr01	29684899
solcap_snp_c2_22530	chr01	29685008
solcap_snp_c1_7136	chr01	30124981
solcap_snp_c2_24677	chr01	30837971
solcap_snp_c2_54308	chr01	31088895
solcap_snp_c1_11066	chr01	32091882
solcap_snp_c1_9378	chr01	34098278
solcap_snp_c1_14956	chr01	35477582
solcap_snp_c2_27683	chr01	37067485
solcap_snp_c2_27682	chr01	37067567
solcap_snp_c2_27681	chr01	37067593
solcap_snp_c2_27680	chr01	37067730
solcap_snp_c1_8535	chr01	37070102
solcap_snp_c1_8541	chr01	37276804
solcap_snp_c1_6795	chr01	37683160
solcap_snp_c2_42829	chr01	38478435
solcap_snp_c1_15714	chr01	39325733
solcap_snp_c2_45395	chr01	39529156
solcap_snp_c2_34940	chr01	39931061
solcap_snp_c2_49732	chr01	41859222
solcap_snp_c1_14647	chr01	41947310
solcap_snp_c1_14648	chr01	41947383
solcap_snp_c1_14649	chr01	41947422
solcap_snp_c2_49719	chr01	41947504
solcap_snp_c2_49720	chr01	41947512
solcap_snp_c2_49722	chr01	41948237
solcap_snp_c2_49723	chr01	41949328
solcap_snp_c2_49724	chr01	41949345
solcap_snp_c2_49726	chr01	41949463
solcap_snp_c1_14654	chr01	41979122
solcap_snp_c2_32110	chr01	42197367
solcap_snp_c2_32111	chr01	42197532
solcap_snp_c2_32112	chr01	42197568
solcap_snp_c2_38726	chr01	42845696
solcap_snp_c1_11506	chr01	42861638
solcap_snp_c2_50028	chr01	43180467
solcap_snp_c2_50023	chr01	43196026
solcap_snp_c2_49042	chr01	43330728
solcap_snp_c1_14512	chr01	43409359
solcap_snp_c1_16169	chr01	44194124
solcap_snp_c1_14238	chr01	44645723
solcap_snp_c1_14248	chr01	44696588
solcap_snp_c1_14249	chr01	44696600
solcap_snp_c1_14259	chr01	44700958
solcap_snp_c1_14261	chr01	44702400
solcap_snp_c2_53708	chr01	44890251
solcap_snp_c2_40131	chr01	45751290
solcap_snp_c2_40105	chr01	45777798
solcap_snp_c2_54811	chr01	46270954
solcap_snp_c1_15853	chr01	46315907
solcap_snp_c1_15855	chr01	46323371
solcap_snp_c2_35221	chr01	47297907
solcap_snp_c2_35220	chr01	47299582
solcap_snp_c2_35218	chr01	47299905
solcap_snp_c2_14939	chr01	47761676
solcap_snp_c1_8358	chr01	49228392
solcap_snp_c1_8362	chr01	49346580
solcap_snp_c2_35601	chr01	50790985
solcap_snp_c2_694	chr01	51290205
solcap_snp_c2_686	chr01	51324358
solcap_snp_c2_57898	chr01	51736518
solcap_snp_c1_12152	chr01	52318789
solcap_snp_c2_41441	chr01	52482174
solcap_snp_c2_41438	chr01	52487732
solcap_snp_c1_880	chr01	54480881
solcap_snp_c2_55113	chr01	54580281
solcap_snp_c2_2871	chr01	55163476
solcap_snp_c2_2873	chr01	55163677
solcap_snp_c2_2874	chr01	55163751
solcap_snp_c2_55621	chr01	55427311
solcap_snp_c1_14219	chr01	57040112
solcap_snp_c2_43275	chr01	57639636
solcap_snp_c1_14633	chr01	57931888
solcap_snp_c2_2721	chr01	58197448
solcap_snp_c1_805	chr01	58567030
solcap_snp_c2_2653	chr01	58737722
solcap_snp_c2_2591	chr01	58985411
solcap_snp_c2_2582	chr01	59070738
solcap_snp_c2_45302	chr01	59361412
solcap_snp_c1_13430	chr01	59363461
solcap_snp_c1_13429	chr01	59363481
solcap_snp_c2_20445	chr02	2060425
solcap_snp_c1_6465	chr02	3616437
solcap_snp_c2_4366	chr02	3747968
solcap_snp_c2_4372	chr02	4194794
solcap_snp_c1_1504	chr02	4479389
solcap_snp_c2_4344	chr02	4885093
solcap_snp_c2_4354	chr02	5159301
solcap_snp_c2_4358	chr02	5355128
solcap_snp_c2_48725	chr02	5510774
solcap_snp_c2_48734	chr02	5552574
solcap_snp_c2_11584	chr02	6068801
solcap_snp_c1_3750	chr02	6090074
solcap_snp_c2_11591	chr02	6647786
solcap_snp_c1_3753	chr02	6891436
solcap_snp_c1_3746	chr02	7050595
solcap_snp_c1_3747	chr02	7050714
solcap_snp_c2_32262	chr02	7426870
solcap_snp_c1_1539	chr02	7830631
solcap_snp_c2_4500	chr02	8170031
solcap_snp_c2_4503	chr02	8181481
solcap_snp_c2_4505	chr02	8202528
solcap_snp_c2_4515	chr02	8246208
solcap_snp_c2_14690	chr02	8398866
solcap_snp_c2_14648	chr02	8799527
solcap_snp_c1_4792	chr02	8802885
solcap_snp_c1_15874	chr02	9296457
solcap_snp_c1_15873	chr02	9296652
solcap_snp_c2_54579	chr02	9299863
solcap_snp_c1_4789	chr02	9329409
solcap_snp_c2_14645	chr02	9338337
solcap_snp_c2_46464	chr02	9766840
solcap_snp_c2_46461	chr02	9768104
solcap_snp_c2_785	chr02	11020073
solcap_snp_c1_239	chr02	11364732
solcap_snp_c2_765	chr02	11867942
solcap_snp_c2_759	chr02	11952609
solcap_snp_c2_758	chr02	11952638
solcap_snp_c1_233	chr02	12004053
solcap_snp_c2_736	chr02	12188316
solcap_snp_c2_735	chr02	12188474
solcap_snp_c2_816	chr02	12504800
solcap_snp_c2_813	chr02	12538232
solcap_snp_c2_811	chr02	12644320
solcap_snp_c2_796	chr02	12949299
solcap_snp_c2_791	chr02	12949976
solcap_snp_c2_55644	chr02	13236568
solcap_snp_c2_806	chr02	13566872
solcap_snp_c2_805	chr02	13566944
solcap_snp_c2_804	chr02	13568405
solcap_snp_c2_803	chr02	13572207
solcap_snp_c2_32244	chr02	13688306
solcap_snp_c2_32252	chr02	13697157
solcap_snp_c2_32253	chr02	13697423
solcap_snp_c2_32254	chr02	13697523
solcap_snp_c2_32257	chr02	13803194
solcap_snp_c2_32237	chr02	13957845
solcap_snp_c2_32239	chr02	14041901
solcap_snp_c1_5228	chr02	14350758
solcap_snp_c2_16347	chr02	14356628
solcap_snp_c2_16348	chr02	14356660
solcap_snp_c2_16350	chr02	14356716
solcap_snp_c2_16335	chr02	14506693
solcap_snp_c2_16341	chr02	14614439
solcap_snp_c1_5224	chr02	14833968
solcap_snp_c2_54473	chr02	15060346
solcap_snp_c2_16362	chr02	15157259
solcap_snp_c1_12296	chr02	15287033
solcap_snp_c2_41875	chr02	15518723
solcap_snp_c2_41874	chr02	15518745
solcap_snp_c2_41906	chr02	15695583
solcap_snp_c2_41905	chr02	15695649
solcap_snp_c2_41904	chr02	15695730
solcap_snp_c2_30952	chr02	15747087
solcap_snp_c2_30950	chr02	15758653
solcap_snp_c2_57028	chr02	15869417
solcap_snp_c2_30940	chr02	16034562
solcap_snp_c2_30937	chr02	16050745
solcap_snp_c2_30911	chr02	16229386
solcap_snp_c2_47096	chr02	16846746
solcap_snp_c1_890	chr02	17183198
solcap_snp_c2_2943	chr02	17206059
solcap_snp_c2_2946	chr02	17206417
solcap_snp_c1_868	chr02	17236308
solcap_snp_c2_49068	chr02	17379552
solcap_snp_c2_41124	chr02	17834472
solcap_snp_c1_15975	chr02	18499853
solcap_snp_c1_15974	chr02	18501334
solcap_snp_c1_15973	chr02	18501382
solcap_snp_c2_54863	chr02	18520191
solcap_snp_c2_53606	chr03	6354080
solcap_snp_c2_5269	chr03	7104975
solcap_snp_c2_5267	chr03	7105399
solcap_snp_c2_5263	chr03	7105688
solcap_snp_c2_5256	chr03	7217277
solcap_snp_c2_5239	chr03	7288799
solcap_snp_c2_5238	chr03	7288867
solcap_snp_c2_5234	chr03	7289711
solcap_snp_c2_5227	chr03	7337024
solcap_snp_c2_5226	chr03	7337144
solcap_snp_c1_1918	chr03	7599703
solcap_snp_c1_1914	chr03	7824125
solcap_snp_c1_1909	chr03	8177658
solcap_snp_c2_5289	chr03	8263418
solcap_snp_c2_54674	chr03	8390507
solcap_snp_c2_5287	chr03	8564101
solcap_snp_c2_5286	chr03	8564142
solcap_snp_c2_38515	chr03	9163294
solcap_snp_c2_54530	chr03	9358570
solcap_snp_c1_15204	chr03	9603835
solcap_snp_c2_5732	chr03	9971288
solcap_snp_c1_2039	chr03	10245644
solcap_snp_c2_5742	chr03	10383457
solcap_snp_c2_5736	chr03	11287783
solcap_snp_c1_7144	chr03	11792597
solcap_snp_c1_11979	chr03	12886399
solcap_snp_c1_11985	chr03	13104179
solcap_snp_c1_10555	chr03	13393873
solcap_snp_c2_35563	chr03	13505833
solcap_snp_c2_35553	chr03	13562131
solcap_snp_c2_35552	chr03	13584242
solcap_snp_c1_11196	chr03	13872519
solcap_snp_c1_11202	chr03	13929679
solcap_snp_c2_37413	chr03	13982156
solcap_snp_c2_37414	chr03	14139961
solcap_snp_c1_15829	chr03	14646478
solcap_snp_c1_11840	chr03	14979685
solcap_snp_c1_3346	chr03	15243506
solcap_snp_c2_10087	chr03	15355001
solcap_snp_c2_10088	chr03	15654535
solcap_snp_c1_3347	chr03	16008414
solcap_snp_c1_10725	chr03	16833849
solcap_snp_c1_10737	chr03	16887518
solcap_snp_c2_36017	chr03	16988929
solcap_snp_c1_10743	chr03	16989140
solcap_snp_c2_36018	chr03	17013558
solcap_snp_c2_56077	chr03	17198119
solcap_snp_c2_56080	chr03	17239214
solcap_snp_c1_16267	chr03	17239217
solcap_snp_c2_664	chr03	17336653
solcap_snp_c2_661	chr03	17668275
solcap_snp_c2_659	chr03	17668488
solcap_snp_c2_657	chr03	17668710
solcap_snp_c2_649	chr03	18052893
solcap_snp_c2_648	chr03	18052994
solcap_snp_c2_646	chr03	18855669
solcap_snp_c2_644	chr03	18972218
solcap_snp_c1_171	chr03	19105081
solcap_snp_c1_167	chr03	19813675
solcap_snp_c2_634	chr03	19893461
solcap_snp_c1_156	chr03	20183296
solcap_snp_c1_200	chr03	20614716
solcap_snp_c1_450	chr03	21336716
solcap_snp_c1_456	chr03	22177581
solcap_snp_c2_11253	chr03	22658606
solcap_snp_c1_3647	chr03	22782440
solcap_snp_c2_11272	chr03	22942919
solcap_snp_c2_11271	chr03	22942945
solcap_snp_c1_3662	chr03	22982837
solcap_snp_c2_11269	chr03	23155488
solcap_snp_c2_11260	chr03	23462197
solcap_snp_c2_37005	chr03	24261459
solcap_snp_c2_14424	chr03	25742118
solcap_snp_c2_41163	chr03	31745504
solcap_snp_c1_13652	chr03	32080786
solcap_snp_c2_41061	chr03	32759308
solcap_snp_c2_41056	chr03	32828579
solcap_snp_c2_41055	chr03	32856641
solcap_snp_c2_41072	chr03	32950090
solcap_snp_c2_41071	chr03	32950171
solcap_snp_c2_51096	chr03	33393461
solcap_snp_c1_14973	chr03	33464174
solcap_snp_c1_14975	chr03	33475318
solcap_snp_c2_56635	chr03	33495019
solcap_snp_c1_16382	chr03	33495209
solcap_snp_c1_16381	chr03	33496751
solcap_snp_c2_43270	chr03	34350488
solcap_snp_c2_43267	chr03	34373409
solcap_snp_c2_43262	chr03	34399858
solcap_snp_c2_43258	chr03	34433739
solcap_snp_c1_12745	chr03	34492320
solcap_snp_c2_43255	chr03	34493007
solcap_snp_c1_12751	chr03	34637736
solcap_snp_c1_12749	chr03	34638581
solcap_snp_c2_54671	chr03	35218601
solcap_snp_c2_43182	chr03	35358381
solcap_snp_c2_35358	chr03	35991675
solcap_snp_c2_35355	chr03	36000522
solcap_snp_c2_35354	chr03	36000658
solcap_snp_c2_35350	chr03	36001002
solcap_snp_c1_15925	chr03	36151152
solcap_snp_c1_15926	chr03	36151220
solcap_snp_c2_54687	chr03	36152649
solcap_snp_c2_30741	chr03	36334363
solcap_snp_c2_30730	chr03	36484535
solcap_snp_c1_9292	chr03	36528674
solcap_snp_c1_9268	chr03	36658149
solcap_snp_c1_4814	chr03	36840643
solcap_snp_c2_55729	chr03	36920317
solcap_snp_c2_57012	chr03	36939832
solcap_snp_c2_49970	chr03	37121012
solcap_snp_c2_49976	chr03	37167370
solcap_snp_c1_15343	chr03	37485839
solcap_snp_c2_52495	chr03	37489792
solcap_snp_c1_15342	chr03	37493452
solcap_snp_c2_52494	chr03	37495967
solcap_snp_c1_7133	chr03	37678746
solcap_snp_c1_7139	chr03	37699819
solcap_snp_c2_38729	chr04	12136285
solcap_snp_c2_51549	chr04	12313706
solcap_snp_c1_15085	chr04	12328283
solcap_snp_c2_51559	chr04	12333216
solcap_snp_c2_51560	chr04	12333285
solcap_snp_c2_51567	chr04	12358340
solcap_snp_c2_56253	chr04	12425752
solcap_snp_c2_56254	chr04	12425763
solcap_snp_c2_56255	chr04	12425807
solcap_snp_c2_56256	chr04	12425864
solcap_snp_c2_56257	chr04	12428259
solcap_snp_c2_56258	chr04	12428301
solcap_snp_c1_16299	chr04	12428537
solcap_snp_c2_56250	chr04	12430221
solcap_snp_c2_56251	chr04	12430239
solcap_snp_c2_56252	chr04	12430248
solcap_snp_c2_49853	chr04	13549150
solcap_snp_c2_49850	chr04	13555777
solcap_snp_c2_49848	chr04	13555806
solcap_snp_c2_49847	chr04	13556151
solcap_snp_c2_49846	chr04	13556694
solcap_snp_c2_21637	chr04	13863939
solcap_snp_c2_29468	chr04	14695720
solcap_snp_c1_8982	chr04	14749556
solcap_snp_c2_14930	chr04	19581827
solcap_snp_c2_56052	chr04	19953880
solcap_snp_c1_16261	chr04	19955997
solcap_snp_c1_11406	chr04	21441241
solcap_snp_c2_38247	chr04	21441266
solcap_snp_c2_38246	chr04	21441327
solcap_snp_c2_38243	chr04	21716528
solcap_snp_c2_21604	chr04	22069806
solcap_snp_c2_18223	chr04	22839744
solcap_snp_c2_18221	chr04	23107795
solcap_snp_c2_54709	chr04	23511256
solcap_snp_c1_14213	chr04	25014612
solcap_snp_c2_48073	chr04	25020860
solcap_snp_c2_48074	chr04	25021008
solcap_snp_c2_55707	chr04	25320523
solcap_snp_c2_55708	chr04	25320525
solcap_snp_c2_55709	chr04	25335742
solcap_snp_c2_39961	chr04	25357073
solcap_snp_c1_859	chr04	26534587
solcap_snp_c2_38379	chr04	28152088
solcap_snp_c2_32900	chr04	28997907
solcap_snp_c2_32901	chr04	28997918
solcap_snp_c2_32904	chr04	29010157
solcap_snp_c1_9837	chr04	29012392
solcap_snp_c1_9839	chr04	29012970
solcap_snp_c1_12887	chr04	29636913
solcap_snp_c1_6157	chr04	30716444
solcap_snp_c1_9476	chr04	30812992
solcap_snp_c2_31361	chr04	31160462
solcap_snp_c2_31360	chr04	31162129
solcap_snp_c2_31359	chr04	31162231
solcap_snp_c2_31358	chr04	31162267
solcap_snp_c1_9477	chr04	31226172
solcap_snp_c2_11101	chr04	31876491
solcap_snp_c2_11104	chr04	31876688
solcap_snp_c1_3616	chr04	31884920
solcap_snp_c2_11107	chr04	32092217
solcap_snp_c1_3436	chr04	32229561
solcap_snp_c2_10461	chr04	32402750
solcap_snp_c1_3443	chr04	32779431
solcap_snp_c2_10443	chr04	33160548
solcap_snp_c2_57338	chr04	33265976
solcap_snp_c1_14569	chr04	33473330
solcap_snp_c2_58366	chr04	34230472
solcap_snp_c2_37598	chr04	34826074
solcap_snp_c2_37596	chr04	34826609
solcap_snp_c2_41106	chr04	35757952
solcap_snp_c2_41104	chr04	36017106
solcap_snp_c2_41102	chr04	36017189
solcap_snp_c2_19422	chr04	36304229
solcap_snp_c1_8367	chr04	37632125
solcap_snp_c1_8368	chr04	37632181
solcap_snp_c1_13125	chr04	37992737
solcap_snp_c1_13124	chr04	37992766
solcap_snp_c2_44554	chr04	38080947
solcap_snp_c2_26884	chr04	38495988
solcap_snp_c2_47242	chr04	41061520
solcap_snp_c2_47244	chr04	41061674
solcap_snp_c1_14038	chr04	41063555
solcap_snp_c1_14039	chr04	41063770
solcap_snp_c2_49995	chr04	42033246
solcap_snp_c1_6127	chr04	42083066
solcap_snp_c1_6126	chr04	42084637
solcap_snp_c1_9111	chr04	42972233
solcap_snp_c1_10941	chr04	43896886
solcap_snp_c1_15042	chr04	44312537
solcap_snp_c2_14924	chr04	44708097
solcap_snp_c2_53248	chr04	45356695
solcap_snp_c2_43229	chr04	45581120
solcap_snp_c2_55090	chr04	45805693
solcap_snp_c2_54605	chr04	45916672
solcap_snp_c2_56758	chr04	46394596
solcap_snp_c1_3311	chr04	46475704
solcap_snp_c1_3310	chr04	46475710
solcap_snp_c1_3319	chr04	46805479
solcap_snp_c1_3316	chr04	47323192
solcap_snp_c2_10008	chr04	47579278
solcap_snp_c1_2681	chr04	48003427
solcap_snp_c1_5209	chr04	48610397
solcap_snp_c2_16720	chr04	48815596
solcap_snp_c2_16722	chr04	48815750
solcap_snp_c2_16712	chr04	48922939
solcap_snp_c2_16718	chr04	49159890
solcap_snp_c2_16731	chr04	49259783
solcap_snp_c2_16744	chr04	49474555
solcap_snp_c1_15530	chr04	49574635
solcap_snp_c2_48814	chr04	50193422
solcap_snp_c2_48817	chr04	50241640
solcap_snp_c2_48818	chr04	50242180
solcap_snp_c1_14442	chr04	50326084
solcap_snp_c1_16534	chr04	50439613
solcap_snp_c2_51899	chr05	10808069
solcap_snp_c2_43663	chr05	11157517
solcap_snp_c2_24329	chr05	11376900
solcap_snp_c1_15864	chr05	11714089
solcap_snp_c2_38456	chr05	12209043
solcap_snp_c2_38490	chr05	12301602
solcap_snp_c2_56464	chr05	12661379
solcap_snp_c2_54598	chr05	13164523
solcap_snp_c2_53298	chr05	13360466
solcap_snp_c2_53307	chr05	13386684
solcap_snp_c2_53306	chr05	13386689
solcap_snp_c2_47087	chr05	13688447
solcap_snp_c2_53296	chr05	14011967
solcap_snp_c2_38739	chr05	14151270
solcap_snp_c2_38738	chr05	14151710
solcap_snp_c2_38737	chr05	14151730
solcap_snp_c2_44034	chr05	14363563
solcap_snp_c1_12966	chr05	14428203
solcap_snp_c2_54725	chr05	14541535
solcap_snp_c2_37554	chr05	14586944
solcap_snp_c2_37550	chr05	14671764
solcap_snp_c2_53962	chr05	14877362
solcap_snp_c2_51980	chr05	15061631
solcap_snp_c2_54743	chr05	15144817
solcap_snp_c2_54742	chr05	15144915
solcap_snp_c2_54741	chr05	15144939
solcap_snp_c2_49280	chr05	15735037
solcap_snp_c2_49286	chr05	15767704
solcap_snp_c2_53565	chr05	15799188
solcap_snp_c2_49278	chr05	15805565
solcap_snp_c2_48317	chr05	16835124
solcap_snp_c2_44073	chr05	17003787
solcap_snp_c1_15249	chr05	17620118
solcap_snp_c1_12835	chr05	17840305
solcap_snp_c2_43566	chr05	18120712
solcap_snp_c2_43568	chr05	18167048
solcap_snp_c1_14700	chr05	18295841
solcap_snp_c1_5058	chr05	18632465
solcap_snp_c2_15676	chr05	18718517
solcap_snp_c2_15722	chr05	19108700
solcap_snp_c2_49666	chr05	19633164
solcap_snp_c2_52058	chr05	20265189
solcap_snp_c2_52057	chr05	20265893
solcap_snp_c2_52056	chr05	20273756
solcap_snp_c2_52055	chr05	20273826
solcap_snp_c2_52054	chr05	20274240
solcap_snp_c2_52053	chr05	20274281
solcap_snp_c1_15192	chr05	20318671
solcap_snp_c1_15189	chr05	20323453
solcap_snp_c1_15536	chr05	20380406
solcap_snp_c2_49322	chr05	25090309
solcap_snp_c2_49323	chr05	25092573
solcap_snp_c1_9603	chr05	27186875
solcap_snp_c2_56304	chr05	28306604
solcap_snp_c1_4464	chr05	32104744
solcap_snp_c1_4455	chr05	32421001
solcap_snp_c1_4454	chr05	32680860
solcap_snp_c2_13865	chr05	32758033
solcap_snp_c2_13856	chr05	32845925
solcap_snp_c2_38250	chr05	33230987
solcap_snp_c2_38252	chr05	33270249
solcap_snp_c2_57072	chr05	34469818
solcap_snp_c2_49385	chr05	34686144
solcap_snp_c2_52870	chr05	34965675
solcap_snp_c2_54570	chr05	35390434
solcap_snp_c2_38365	chr05	35572771
solcap_snp_c2_38356	chr05	35576954
solcap_snp_c2_50226	chr05	36824795
solcap_snp_c2_50231	chr05	36834630
solcap_snp_c2_48422	chr05	37236177
solcap_snp_c2_47966	chr05	38614493
solcap_snp_c2_47976	chr05	38615229
solcap_snp_c1_14404	chr05	39205488
solcap_snp_c1_14403	chr05	39205522
solcap_snp_c1_14402	chr05	39207879
solcap_snp_c1_14400	chr05	39208090
solcap_snp_c2_48723	chr05	39211022
solcap_snp_c2_57241	chr05	39678218
solcap_snp_c2_57242	chr05	39678342
solcap_snp_c2_57243	chr05	39678348
solcap_snp_c2_57245	chr05	39681703
solcap_snp_c2_52397	chr05	40450599
solcap_snp_c2_52398	chr05	40450702
solcap_snp_c2_40088	chr05	41539479
solcap_snp_c2_40089	chr05	41539529
solcap_snp_c1_11868	chr05	41539860
solcap_snp_c1_11870	chr05	41541268
solcap_snp_c2_40092	chr05	41542623
solcap_snp_c1_14086	chr05	42206237
solcap_snp_c2_47398	chr05	42259194
solcap_snp_c2_47405	chr05	42260024
solcap_snp_c2_5006	chr05	42300405
solcap_snp_c1_1802	chr05	42300779
solcap_snp_c2_5221	chr05	42524215
solcap_snp_c2_5215	chr05	42894565
solcap_snp_c2_5214	chr05	42894591
solcap_snp_c2_5212	chr05	42898344
solcap_snp_c2_5191	chr05	43116163
solcap_snp_c1_1875	chr05	43212090
solcap_snp_c2_5157	chr05	43217842
solcap_snp_c2_5156	chr05	43217989
solcap_snp_c2_5154	chr05	43218223
solcap_snp_c2_5152	chr05	43218321
solcap_snp_c2_5151	chr05	43218399
solcap_snp_c2_5150	chr05	43218748
solcap_snp_c1_1874	chr05	43218843
solcap_snp_c1_1873	chr05	43218969
solcap_snp_c2_5148	chr05	43219353
solcap_snp_c2_5137	chr05	43300256
solcap_snp_c2_33932	chr06	6903226
solcap_snp_c2_33933	chr06	6903541
solcap_snp_c2_50183	chr06	7262763
solcap_snp_c2_50182	chr06	7262879
solcap_snp_c2_50180	chr06	7263350
solcap_snp_c2_50179	chr06	7263358
solcap_snp_c1_14778	chr06	7467662
solcap_snp_c1_16656	chr06	7484322
solcap_snp_c1_15811	chr06	7995004
solcap_snp_c2_24266	chr06	8312329
solcap_snp_c2_24279	chr06	8675856
solcap_snp_c2_52798	chr06	8901750
solcap_snp_c2_46048	chr06	9782622
solcap_snp_c2_17377	chr06	10240158
solcap_snp_c2_17378	chr06	10240254
solcap_snp_c2_17379	chr06	11038269
solcap_snp_c2_17380	chr06	11038742
solcap_snp_c2_26498	chr06	11223944
solcap_snp_c2_26499	chr06	11224867
solcap_snp_c2_26500	chr06	11224953
solcap_snp_c2_26501	chr06	11226293
solcap_snp_c2_33105	chr06	12032376
solcap_snp_c1_9601	chr06	17393943
solcap_snp_c2_58126	chr06	17700454
solcap_snp_c2_56793	chr06	20312642
solcap_snp_c2_56794	chr06	20312683
solcap_snp_c1_16621	chr06	21067273
solcap_snp_c2_33228	chr06	21375520
solcap_snp_c2_33226	chr06	21482244
solcap_snp_c2_12403	chr06	23814407
solcap_snp_c2_12402	chr06	23933179
solcap_snp_c2_12399	chr06	24508249
solcap_snp_c1_14880	chr06	24858593
solcap_snp_c1_1576	chr06	25513719
solcap_snp_c2_4590	chr06	26363264
solcap_snp_c2_55661	chr06	26935261
solcap_snp_c2_24050	chr06	27490699
solcap_snp_c2_32893	chr06	28434793
solcap_snp_c2_32894	chr06	28434931
solcap_snp_c1_10560	chr06	28621195
solcap_snp_c2_35592	chr06	28886273
solcap_snp_c2_11293	chr06	29589233
solcap_snp_c2_11286	chr06	29797293
solcap_snp_c2_11287	chr06	29945939
solcap_snp_c2_11289	chr06	29947610
solcap_snp_c2_11294	chr06	30214532
solcap_snp_c2_11303	chr06	30365962
solcap_snp_c2_11309	chr06	30379521
solcap_snp_c2_11310	chr06	30381815
solcap_snp_c2_11312	chr06	30382091
solcap_snp_c2_11313	chr06	30382462
solcap_snp_c2_11314	chr06	30382472
solcap_snp_c2_11315	chr06	30382751
solcap_snp_c2_11316	chr06	30382874
solcap_snp_c2_11318	chr06	30384618
solcap_snp_c2_11319	chr06	30384625
solcap_snp_c2_11330	chr06	30443070
solcap_snp_c2_11332	chr06	30443140
solcap_snp_c2_11333	chr06	30443155
solcap_snp_c2_11334	chr06	30455863
solcap_snp_c1_3687	chr06	30456106
solcap_snp_c1_3689	chr06	30466255
solcap_snp_c1_3691	chr06	30647661
solcap_snp_c2_52569	chr06	30915096
solcap_snp_c2_36599	chr06	31043830
solcap_snp_c2_36598	chr06	31043959
solcap_snp_c2_36595	chr06	31135283
solcap_snp_c2_36590	chr06	31441466
solcap_snp_c1_10901	chr06	31519424
solcap_snp_c2_32952	chr06	31590352
solcap_snp_c2_32938	chr06	31631446
solcap_snp_c2_32919	chr06	31800267
solcap_snp_c2_32918	chr06	31830854
solcap_snp_c2_57825	chr06	32007868
solcap_snp_c1_9846	chr06	32103689
solcap_snp_c2_34002	chr06	32433877
solcap_snp_c2_34003	chr06	32433919
solcap_snp_c1_10157	chr06	32541853
solcap_snp_c2_53506	chr06	33703950
solcap_snp_c2_38663	chr06	33776207
solcap_snp_c1_13871	chr06	33814201
solcap_snp_c2_49638	chr06	34092138
solcap_snp_c2_50222	chr06	34311641
solcap_snp_c2_50221	chr06	34311754
solcap_snp_c2_50220	chr06	34311834
solcap_snp_c1_8603	chr06	34825744
solcap_snp_c2_27867	chr06	34893250
solcap_snp_c2_27866	chr06	34893351
solcap_snp_c2_27863	chr06	34950532
solcap_snp_c1_8599	chr06	35138137
solcap_snp_c1_8594	chr06	35194342
solcap_snp_c2_24297	chr06	35798871
solcap_snp_c2_24311	chr06	35933697
solcap_snp_c2_24322	chr06	36214491
solcap_snp_c1_13422	chr06	36435709
solcap_snp_c1_12409	chr06	36765007
solcap_snp_c2_42346	chr06	36881092
solcap_snp_c2_42348	chr06	36881223
solcap_snp_c2_42350	chr06	36881392
solcap_snp_c2_42351	chr06	36881468
solcap_snp_c2_42353	chr06	36882933
solcap_snp_c2_42354	chr06	36883178
solcap_snp_c2_42355	chr06	36883186
solcap_snp_c2_37626	chr06	37258967
solcap_snp_c2_37603	chr06	37390413
solcap_snp_c2_37615	chr06	37528473
solcap_snp_c2_43097	chr06	37602023
solcap_snp_c2_43096	chr06	37602140
solcap_snp_c2_43093	chr06	37602254
solcap_snp_c2_43084	chr06	37602989
solcap_snp_c1_16201	chr07	7681296
solcap_snp_c2_42640	chr07	7938249
solcap_snp_c2_42655	chr07	8232022
solcap_snp_c2_56433	chr07	8384204
solcap_snp_c2_50549	chr07	8518170
solcap_snp_c2_56008	chr07	8717409
solcap_snp_c2_52104	chr07	9125414
solcap_snp_c2_8740	chr07	9438503
solcap_snp_c2_36159	chr07	9774022
solcap_snp_c1_10855	chr07	9998099
solcap_snp_c2_49833	chr07	10157494
solcap_snp_c2_49834	chr07	10161381
solcap_snp_c2_49836	chr07	10161576
solcap_snp_c2_49841	chr07	10163412
solcap_snp_c2_6600	chr07	10650029
solcap_snp_c2_6603	chr07	10650914
solcap_snp_c2_6606	chr07	10651343
solcap_snp_c2_6607	chr07	10651355
solcap_snp_c2_6608	chr07	10651704
solcap_snp_c2_6609	chr07	10651711
solcap_snp_c2_6616	chr07	10836465
solcap_snp_c2_6617	chr07	10836607
solcap_snp_c2_6618	chr07	10836630
solcap_snp_c2_6619	chr07	10837195
solcap_snp_c2_6620	chr07	10837264
solcap_snp_c2_6621	chr07	10837623
solcap_snp_c1_2404	chr07	10838437
solcap_snp_c1_2405	chr07	10838506
solcap_snp_c2_6622	chr07	10838770
solcap_snp_c2_6666	chr07	11416880
solcap_snp_c1_2398	chr07	11640657
solcap_snp_c2_6574	chr07	11797542
solcap_snp_c2_6582	chr07	12122133
solcap_snp_c2_6583	chr07	12122333
solcap_snp_c2_6584	chr07	12122489
solcap_snp_c2_4567	chr07	12696253
solcap_snp_c2_4555	chr07	12881239
solcap_snp_c2_4578	chr07	13637552
solcap_snp_c2_4579	chr07	13637711
solcap_snp_c2_4583	chr07	13638810
solcap_snp_c2_4342	chr07	14924207
solcap_snp_c1_1481	chr07	15669100
solcap_snp_c2_11386	chr07	17633969
solcap_snp_c1_3696	chr07	18005870
solcap_snp_c2_19704	chr07	18508065
solcap_snp_c2_4393	chr07	18715095
solcap_snp_c2_19696	chr07	18929739
solcap_snp_c2_45214	chr07	19610654
solcap_snp_c1_13998	chr07	19993451
solcap_snp_c1_6523	chr07	20460129
solcap_snp_c2_20577	chr07	21317120
solcap_snp_c2_5902	chr07	21365349
solcap_snp_c2_5901	chr07	21365454
solcap_snp_c2_5900	chr07	21367162
solcap_snp_c1_2124	chr07	22890130
solcap_snp_c1_9478	chr07	23716646
solcap_snp_c2_31367	chr07	23716935
solcap_snp_c2_31369	chr07	23718663
solcap_snp_c2_31370	chr07	23718727
solcap_snp_c2_31373	chr07	23718949
solcap_snp_c2_31374	chr07	23719031
solcap_snp_c2_31375	chr07	23719258
solcap_snp_c2_31376	chr07	23719402
solcap_snp_c1_8215	chr07	24670978
solcap_snp_c2_2855	chr07	24708907
solcap_snp_c2_2856	chr07	24713400
solcap_snp_c2_8195	chr07	25726520
solcap_snp_c1_2786	chr07	25775384
solcap_snp_c2_8183	chr07	26036634
solcap_snp_c1_2778	chr07	26038100
solcap_snp_c2_34557	chr07	26752660
solcap_snp_c2_34561	chr07	26752905
solcap_snp_c2_18241	chr07	27223779
solcap_snp_c2_53703	chr07	29307443
solcap_snp_c2_11404	chr07	32481378
solcap_snp_c2_11400	chr07	32483170
solcap_snp_c1_2790	chr07	32978081
solcap_snp_c1_2792	chr07	32978402
solcap_snp_c1_2793	chr07	32978471
solcap_snp_c1_2795	chr07	33344388
solcap_snp_c2_7712	chr07	33935337
solcap_snp_c2_7715	chr07	33940193
solcap_snp_c2_7728	chr07	34520749
solcap_snp_c2_7735	chr07	34592733
solcap_snp_c1_2672	chr07	34754163
solcap_snp_c1_512	chr07	35456235
solcap_snp_c1_513	chr07	35757925
solcap_snp_c2_1962	chr07	36278195
solcap_snp_c2_1964	chr07	36278447
solcap_snp_c2_1968	chr07	36287950
solcap_snp_c2_1974	chr07	36400742
solcap_snp_c2_1975	chr07	36400942
solcap_snp_c2_1980	chr07	36406834
solcap_snp_c2_1991	chr07	36529795
solcap_snp_c2_1993	chr07	36553264
solcap_snp_c2_2000	chr07	36802629
solcap_snp_c2_2002	chr07	36803058
solcap_snp_c1_482	chr07	36903616
solcap_snp_c1_483	chr07	36903617
solcap_snp_c2_2031	chr07	37075852
solcap_snp_c1_500	chr07	37223877
solcap_snp_c2_2074	chr07	37474330
solcap_snp_c2_13889	chr07	38047700
solcap_snp_c2_13908	chr07	38283065
solcap_snp_c2_4530	chr07	38673809
solcap_snp_c2_4445	chr07	39086805
solcap_snp_c2_12746	chr08	7267927
solcap_snp_c1_15451	chr08	7440493
solcap_snp_c2_52856	chr08	7443846
solcap_snp_c2_52857	chr08	7445492
solcap_snp_c2_47905	chr08	7795210
solcap_snp_c1_14166	chr08	7836331
solcap_snp_c2_47901	chr08	7838596
solcap_snp_c2_47900	chr08	7838662
solcap_snp_c2_47896	chr08	7843374
solcap_snp_c2_19631	chr08	8354399
solcap_snp_c1_5707	chr08	9087306
solcap_snp_c1_5710	chr08	9092009
solcap_snp_c1_5713	chr08	9226857
solcap_snp_c2_17304	chr08	9320279
solcap_snp_c2_17315	chr08	9479127
solcap_snp_c2_17318	chr08	9554691
solcap_snp_c2_17320	chr08	9554970
solcap_snp_c2_17321	chr08	9558581
solcap_snp_c2_17322	chr08	9559536
solcap_snp_c2_57003	chr08	9975029
solcap_snp_c2_57002	chr08	9975056
solcap_snp_c1_14314	chr08	10214111
solcap_snp_c2_48358	chr08	10277914
solcap_snp_c2_33772	chr08	10832976
solcap_snp_c2_33771	chr08	10833062
solcap_snp_c2_31354	chr08	11695077
solcap_snp_c2_30904	chr08	12698558
solcap_snp_c2_30907	chr08	12699036
solcap_snp_c1_2686	chr08	13212735
solcap_snp_c1_2687	chr08	13213033
solcap_snp_c2_7785	chr08	13213183
solcap_snp_c2_28519	chr08	13627692
solcap_snp_c1_8766	chr08	13627703
solcap_snp_c2_57849	chr08	14440357
solcap_snp_c2_50849	chr08	15139435
solcap_snp_c2_34091	chr08	15880148
solcap_snp_c2_53880	chr08	15911262
solcap_snp_c1_15689	chr08	15912416
solcap_snp_c2_34085	chr08	15953548
solcap_snp_c2_34082	chr08	15999721
solcap_snp_c2_34565	chr08	16250630
solcap_snp_c2_34564	chr08	16652660
solcap_snp_c2_42290	chr08	17061842
solcap_snp_c2_2122	chr08	17233898
solcap_snp_c1_516	chr08	18102670
solcap_snp_c2_2178	chr08	18395020
solcap_snp_c2_2183	chr08	19348560
solcap_snp_c2_19951	chr08	19827795
solcap_snp_c2_19949	chr08	19827882
solcap_snp_c2_19942	chr08	19950036
solcap_snp_c2_19940	chr08	19950249
solcap_snp_c2_19934	chr08	20246896
solcap_snp_c1_6252	chr08	20465382
solcap_snp_c1_6262	chr08	20584401
solcap_snp_c2_2850	chr08	20914799
solcap_snp_c2_2842	chr08	21132878
solcap_snp_c2_2840	chr08	21133008
solcap_snp_c2_2837	chr08	21434617
solcap_snp_c2_2826	chr08	21591331
solcap_snp_c2_8167	chr08	21906383
solcap_snp_c2_8169	chr08	21989034
solcap_snp_c2_8172	chr08	22239641
solcap_snp_c2_5915	chr08	23895193
solcap_snp_c2_5914	chr08	23895246
solcap_snp_c2_5909	chr08	23895925
solcap_snp_c2_29494	chr08	26158842
solcap_snp_c2_29495	chr08	26158884
solcap_snp_c2_29496	chr08	26158979
solcap_snp_c2_29498	chr08	26162678
solcap_snp_c2_29478	chr08	26163279
solcap_snp_c2_29286	chr08	28479954
solcap_snp_c2_29284	chr08	28480153
solcap_snp_c2_29283	chr08	28480198
solcap_snp_c2_29282	chr08	28480293
solcap_snp_c2_29280	chr08	28480587
solcap_snp_c2_19426	chr08	29755831
solcap_snp_c1_6130	chr08	29756364
solcap_snp_c1_6131	chr08	29756431
solcap_snp_c2_19427	chr08	29757226
solcap_snp_c2_19428	chr08	29757433
solcap_snp_c2_19429	chr08	29758156
solcap_snp_c2_19431	chr08	29758299
solcap_snp_c2_19432	chr08	29758723
solcap_snp_c2_19433	chr08	29758730
solcap_snp_c1_6136	chr08	29812858
solcap_snp_c1_6138	chr08	29813852
solcap_snp_c1_6140	chr08	29813975
solcap_snp_c1_6142	chr08	29876786
solcap_snp_c2_19437	chr08	30148056
solcap_snp_c2_19438	chr08	30148208
solcap_snp_c2_19439	chr08	30148252
solcap_snp_c2_19442	chr08	30149471
solcap_snp_c2_47923	chr08	30353879
solcap_snp_c1_14174	chr08	30362485
solcap_snp_c2_47922	chr08	30365828
solcap_snp_c2_47921	chr08	30367119
solcap_snp_c2_47920	chr08	30367162
solcap_snp_c2_30254	chr08	32229217
solcap_snp_c1_9167	chr08	32239155
solcap_snp_c1_9170	chr08	32311544
solcap_snp_c2_30272	chr08	32312504
solcap_snp_c1_9174	chr08	32472512
solcap_snp_c2_30288	chr08	32544771
solcap_snp_c2_30293	chr08	32685897
solcap_snp_c1_11442	chr08	32956500
solcap_snp_c2_33766	chr08	33597174
solcap_snp_c1_12082	chr08	34077547
solcap_snp_c2_50362	chr08	34342007
solcap_snp_c2_32809	chr08	34576702
solcap_snp_c2_32803	chr08	34751650
solcap_snp_c2_32802	chr08	34865887
solcap_snp_c2_57660	chr08	34986682
solcap_snp_c1_11719	chr08	35379060
solcap_snp_c2_55129	chr09	10235747
solcap_snp_c2_49770	chr09	10351747
solcap_snp_c2_49766	chr09	10352617
solcap_snp_c2_49764	chr09	10352719
solcap_snp_c1_14668	chr09	10353176
solcap_snp_c1_14676	chr09	10414891
solcap_snp_c1_14674	chr09	10415002
solcap_snp_c1_14669	chr09	10451737
solcap_snp_c2_58234	chr09	11226418
solcap_snp_c2_58236	chr09	11226827
solcap_snp_c2_52898	chr09	11311563
solcap_snp_c1_7530	chr09	11460409
solcap_snp_c2_23449	chr09	11720990
solcap_snp_c2_23439	chr09	11805410
solcap_snp_c2_23431	chr09	11806183
solcap_snp_c2_23426	chr09	11806552
solcap_snp_c2_38526	chr09	12280244
solcap_snp_c2_46028	chr09	12790782
solcap_snp_c2_46029	chr09	12790816
solcap_snp_c2_46030	chr09	12795763
solcap_snp_c2_4381	chr09	12951888
solcap_snp_c2_4385	chr09	12952173
solcap_snp_c2_4387	chr09	13304005
solcap_snp_c2_4391	chr09	13304468
solcap_snp_c2_4400	chr09	13621663
solcap_snp_c2_33625	chr09	14852854
solcap_snp_c2_33626	chr09	14853028
solcap_snp_c2_33627	chr09	14853083
solcap_snp_c1_9490	chr09	15572748
solcap_snp_c2_31383	chr09	15761159
solcap_snp_c2_549	chr09	16527499
solcap_snp_c2_54998	chr09	17394134
solcap_snp_c2_566	chr09	17853890
solcap_snp_c1_449	chr09	18826247
solcap_snp_c2_1915	chr09	19231866
solcap_snp_c2_1916	chr09	19232127
solcap_snp_c2_1918	chr09	19232397
solcap_snp_c2_1908	chr09	19487287
solcap_snp_c2_58373	chr09	20845412
solcap_snp_c2_57401	chr09	21044695
solcap_snp_c1_8212	chr09	21192684
solcap_snp_c1_8210	chr09	21192924
solcap_snp_c2_26517	chr09	21264610
solcap_snp_c2_26516	chr09	21264794
solcap_snp_c2_26515	chr09	21264861
solcap_snp_c2_26509	chr09	21407743
solcap_snp_c2_26504	chr09	21610960
solcap_snp_c2_44951	chr09	22080291
solcap_snp_c2_19536	chr09	23230273
solcap_snp_c2_19537	chr09	23230341
solcap_snp_c2_57324	chr09	24775960
solcap_snp_c2_51250	chr09	26294853
solcap_snp_c2_37406	chr09	26817485
solcap_snp_c1_11473	chr09	28616793
solcap_snp_c1_958	chr09	28754299
solcap_snp_c1_946	chr09	29066279
solcap_snp_c2_3205	chr09	29070318
solcap_snp_c2_3204	chr09	29070531
solcap_snp_c2_16315	chr09	30812479
solcap_snp_c2_16314	chr09	30812573
solcap_snp_c1_5217	chr09	31049156
solcap_snp_c2_16279	chr09	31520249
solcap_snp_c2_16277	chr09	31520501
solcap_snp_c2_16275	chr09	31521212
solcap_snp_c2_16274	chr09	31521320
solcap_snp_c2_22761	chr09	31630431
solcap_snp_c2_22762	chr09	31630487
solcap_snp_c2_22751	chr09	31697745
solcap_snp_c2_56692	chr09	31988498
solcap_snp_c2_22757	chr09	32235107
solcap_snp_c2_22758	chr09	32236211
solcap_snp_c2_1511	chr09	32567149
solcap_snp_c2_55124	chr09	32588719
solcap_snp_c2_1514	chr09	32671957
solcap_snp_c1_369	chr09	32818172
solcap_snp_c2_1484	chr09	33681088
solcap_snp_c2_1485	chr09	33681267
solcap_snp_c2_1486	chr09	33681501
solcap_snp_c1_364	chr09	33741791
solcap_snp_c2_1493	chr09	34912758
solcap_snp_c2_1494	chr09	34913067
solcap_snp_c2_4200	chr09	35649402
solcap_snp_c2_4205	chr09	35822502
solcap_snp_c1_211	chr09	36041036
solcap_snp_c1_212	chr09	36524095
solcap_snp_c2_680	chr09	36646002
solcap_snp_c2_681	chr09	36646088
solcap_snp_c2_689	chr09	38266787
solcap_snp_c2_701	chr09	38648276
solcap_snp_c1_2319	chr09	39333997
solcap_snp_c2_6333	chr09	39760282
solcap_snp_c2_58247	chr09	40414635
solcap_snp_c2_58248	chr09	40416291
solcap_snp_c2_58249	chr09	40416304
solcap_snp_c2_20473	chr09	43780085
solcap_snp_c2_56168	chr09	43864160
solcap_snp_c1_6476	chr09	43993316
solcap_snp_c2_20464	chr09	43997824
solcap_snp_c2_20481	chr09	44403906
solcap_snp_c2_20479	chr09	44405128
solcap_snp_c2_54952	chr09	44519287
solcap_snp_c1_8013	chr09	44621057
solcap_snp_c2_39868	chr10	5879492
solcap_snp_c1_11801	chr10	5989940
solcap_snp_c1_11802	chr10	5992157
solcap_snp_c1_11804	chr10	5992298
solcap_snp_c1_11806	chr10	6151401
solcap_snp_c2_32786	chr10	6303532
solcap_snp_c2_32790	chr10	6306500
solcap_snp_c2_32739	chr10	6335907
solcap_snp_c2_32740	chr10	6336014
solcap_snp_c1_9799	chr10	6439438
solcap_snp_c2_32768	chr10	6571951
solcap_snp_c2_40523	chr10	14785936
solcap_snp_c2_40522	chr10	14786019
solcap_snp_c2_47	chr10	18124336
solcap_snp_c2_15658	chr10	18710197
solcap_snp_c1_14048	chr10	19895866
solcap_snp_c1_14047	chr10	20040041
solcap_snp_c1_14045	chr10	20042336
solcap_snp_c1_14053	chr10	20101484
solcap_snp_c1_16651	chr10	20126251
solcap_snp_c2_55085	chr10	20334943
solcap_snp_c2_1905	chr10	23213420
solcap_snp_c2_1903	chr10	23213794
solcap_snp_c2_52793	chr10	23430316
solcap_snp_c2_1898	chr10	23961414
solcap_snp_c2_9021	chr10	27390323
solcap_snp_c1_3060	chr10	27650671
solcap_snp_c1_3057	chr10	28438797
solcap_snp_c1_3052	chr10	29642643
solcap_snp_c1_3051	chr10	29740160
solcap_snp_c1_3049	chr10	29741129
solcap_snp_c2_46146	chr10	30093997
solcap_snp_c1_13683	chr10	30094746
solcap_snp_c1_13682	chr10	30096205
solcap_snp_c1_13681	chr10	30097412
solcap_snp_c2_46144	chr10	30116697
solcap_snp_c1_7	chr10	32251718
solcap_snp_c2_45	chr10	32527590
solcap_snp_c2_37	chr10	32862744
solcap_snp_c2_34	chr10	33235473
solcap_snp_c1_1	chr10	33993379
solcap_snp_c2_63	chr10	34302921
solcap_snp_c2_18265	chr10	36225437
solcap_snp_c1_6068	chr10	38385178
solcap_snp_c2_19222	chr10	38722150
solcap_snp_c2_19223	chr10	38722264
solcap_snp_c2_19224	chr10	38723283
solcap_snp_c2_19225	chr10	38723959
solcap_snp_c1_8601	chr10	39108901
solcap_snp_c2_33008	chr10	39738068
solcap_snp_c2_33005	chr10	39751153
solcap_snp_c2_49184	chr10	40653537
solcap_snp_c1_14531	chr10	40653719
solcap_snp_c1_2673	chr10	42450489
solcap_snp_c2_7747	chr10	43000239
solcap_snp_c2_38277	chr10	43659145
solcap_snp_c2_38274	chr10	43663898
solcap_snp_c2_38273	chr10	43666116
solcap_snp_c2_11679	chr10	44059940
solcap_snp_c2_11609	chr10	44202119
solcap_snp_c2_54932	chr10	45025424
solcap_snp_c2_48929	chr10	45169330
solcap_snp_c2_48928	chr10	45169357
solcap_snp_c2_48927	chr10	45169473
solcap_snp_c2_48926	chr10	45274006
solcap_snp_c2_48917	chr10	45320802
solcap_snp_c2_40826	chr10	45821679
solcap_snp_c2_40833	chr10	45898747
solcap_snp_c1_12031	chr10	45929522
solcap_snp_c1_12028	chr10	45944624
solcap_snp_c1_12027	chr10	45944648
solcap_snp_c1_12026	chr10	45944663
solcap_snp_c1_12025	chr10	45944708
solcap_snp_c1_12024	chr10	45944735
solcap_snp_c1_12022	chr10	45944879
solcap_snp_c2_40827	chr10	45945611
solcap_snp_c2_40824	chr10	45945734
solcap_snp_c2_40823	chr10	45945742
solcap_snp_c2_40822	chr10	45945875
solcap_snp_c2_55861	chr10	46117955
solcap_snp_c2_41376	chr10	46377753
solcap_snp_c2_41396	chr10	46406260
solcap_snp_c2_41395	chr10	46413142
solcap_snp_c2_41394	chr10	46413187
solcap_snp_c2_41393	chr10	46413302
solcap_snp_c2_41392	chr10	46413319
solcap_snp_c2_41391	chr10	46427765
solcap_snp_c2_56515	chr10	46704551
solcap_snp_c2_56514	chr10	46705264
solcap_snp_c2_40766	chr10	47108452
solcap_snp_c2_40765	chr10	47108897
solcap_snp_c2_40764	chr10	47109411
solcap_snp_c2_40763	chr10	47109426
solcap_snp_c2_40762	chr10	47116416
solcap_snp_c2_40760	chr10	47116772
solcap_snp_c2_37580	chr11	12608559
solcap_snp_c2_37586	chr11	12776731
solcap_snp_c2_11362	chr11	13356299
solcap_snp_c1_3694	chr11	13356425
solcap_snp_c2_11364	chr11	13357150
solcap_snp_c2_11366	chr11	13357766
solcap_snp_c2_11369	chr11	13357960
solcap_snp_c2_11377	chr11	13519184
solcap_snp_c2_19461	chr11	14407511
solcap_snp_c2_19465	chr11	14503479
solcap_snp_c2_55036	chr11	14775615
solcap_snp_c2_55035	chr11	14775651
solcap_snp_c2_55034	chr11	14776092
solcap_snp_c2_55038	chr11	14780397
solcap_snp_c1_16141	chr11	15346701
solcap_snp_c1_16325	chr11	15481499
solcap_snp_c1_12160	chr11	16140733
solcap_snp_c1_5716	chr11	16786403
solcap_snp_c2_17332	chr11	16932537
solcap_snp_c1_16555	chr11	18371142
solcap_snp_c2_44941	chr11	18709475
solcap_snp_c2_4961	chr11	19458526
solcap_snp_c2_4958	chr11	19458666
solcap_snp_c1_1784	chr11	20029445
solcap_snp_c2_4989	chr11	20352955
solcap_snp_c1_1781	chr11	20362789
solcap_snp_c1_1779	chr11	20362887
solcap_snp_c1_1778	chr11	20363077
solcap_snp_c1_1775	chr11	20379724
solcap_snp_c1_1774	chr11	20379761
solcap_snp_c2_4986	chr11	20391613
solcap_snp_c1_1770	chr11	20596535
solcap_snp_c2_4979	chr11	20700395
solcap_snp_c2_4978	chr11	20780633
solcap_snp_c2_4957	chr11	20897824
solcap_snp_c1_5410	chr11	22190676
solcap_snp_c1_5411	chr11	22213990
solcap_snp_c2_44637	chr11	24838624
solcap_snp_c2_44635	chr11	24838965
solcap_snp_c2_44634	chr11	24839121
solcap_snp_c2_44633	chr11	24847366
solcap_snp_c1_5936	chr11	26809907
solcap_snp_c1_5940	chr11	27079720
solcap_snp_c2_18245	chr11	27158611
solcap_snp_c1_898	chr11	27834918
solcap_snp_c2_2968	chr11	27852552
solcap_snp_c1_16585	chr11	27940185
solcap_snp_c2_57617	chr11	27944708
solcap_snp_c1_16581	chr11	27945202
solcap_snp_c2_2957	chr11	28602050
solcap_snp_c1_5965	chr11	28731155
solcap_snp_c2_18526	chr11	28912985
solcap_snp_c2_50979	chr11	29873006
solcap_snp_c2_50980	chr11	29873163
solcap_snp_c2_50977	chr11	30164460
solcap_snp_c2_4227	chr11	30591766
solcap_snp_c2_4225	chr11	30598326
solcap_snp_c2_4316	chr11	30782855
solcap_snp_c1_1470	chr11	31047078
solcap_snp_c1_1468	chr11	31193793
solcap_snp_c2_4280	chr11	31367087
solcap_snp_c2_4276	chr11	31440813
solcap_snp_c2_4275	chr11	31440982
solcap_snp_c2_4230	chr11	31645508
solcap_snp_c2_53718	chr11	31857080
solcap_snp_c1_10900	chr11	31998045
solcap_snp_c2_36587	chr11	32113524
solcap_snp_c2_36581	chr11	32152506
solcap_snp_c2_29434	chr11	32899879
solcap_snp_c2_29435	chr11	32948117
solcap_snp_c2_30361	chr11	33085419
solcap_snp_c1_12078	chr11	33491736
solcap_snp_c2_41086	chr11	33595761
solcap_snp_c2_41084	chr11	33596714
solcap_snp_c2_41083	chr11	33596727
solcap_snp_c2_41090	chr11	33763166
solcap_snp_c2_50332	chr11	33927332
solcap_snp_c2_44269	chr11	34271606
solcap_snp_c2_31444	chr11	34424393
solcap_snp_c2_31443	chr11	34424464
solcap_snp_c2_31439	chr11	34425536
solcap_snp_c2_31433	chr11	34426265
solcap_snp_c2_31472	chr11	34589918
solcap_snp_c1_9499	chr11	34592587
solcap_snp_c2_31484	chr11	34617372
solcap_snp_c2_44932	chr12	11740317
solcap_snp_c2_44928	chr12	11740934
solcap_snp_c2_44926	chr12	11741117
solcap_snp_c2_52691	chr12	12034745
solcap_snp_c2_40751	chr12	12476319
solcap_snp_c2_40748	chr12	12654160
solcap_snp_c2_40745	chr12	12655349
solcap_snp_c2_57453	chr12	12743436
solcap_snp_c1_14577	chr12	12834376
solcap_snp_c2_16286	chr12	13248515
solcap_snp_c2_16294	chr12	13267302
solcap_snp_c2_16298	chr12	13270097
solcap_snp_c2_16299	chr12	13270182
solcap_snp_c2_16300	chr12	13270208
solcap_snp_c2_16302	chr12	13271474
solcap_snp_c1_403	chr12	13617956
solcap_snp_c1_15033	chr12	14219601
solcap_snp_c1_15034	chr12	14219727
solcap_snp_c2_21336	chr12	14931696
solcap_snp_c2_45743	chr12	15695850
solcap_snp_c1_14767	chr12	18919522
solcap_snp_c1_8913	chr12	19181173
solcap_snp_c2_53383	chr12	20336319
solcap_snp_c2_48392	chr12	20487184
solcap_snp_c2_48391	chr12	20492079
solcap_snp_c2_56163	chr12	20520046
solcap_snp_c2_16914	chr12	21327401
solcap_snp_c2_16915	chr12	21327580
solcap_snp_c2_16920	chr12	21328580
solcap_snp_c2_16921	chr12	21428593
solcap_snp_c2_16930	chr12	21708079
solcap_snp_c2_10060	chr12	22135725
solcap_snp_c2_10055	chr12	22137399
solcap_snp_c2_10047	chr12	22237923
solcap_snp_c2_10042	chr12	22677921
solcap_snp_c1_3326	chr12	22905890
solcap_snp_c2_58209	chr12	24386302
solcap_snp_c2_58210	chr12	24386342
solcap_snp_c1_16695	chr12	24386805
solcap_snp_c1_16696	chr12	24386878
solcap_snp_c1_8914	chr12	25841735
solcap_snp_c2_29304	chr12	25904593
solcap_snp_c2_40524	chr12	26157851
solcap_snp_c2_49334	chr12	26423442
solcap_snp_c2_50139	chr12	27348155
solcap_snp_c2_50137	chr12	27416356
solcap_snp_c2_50136	chr12	27416459
solcap_snp_c2_27921	chr12	28906171
solcap_snp_c1_13066	chr12	30582910
solcap_snp_c2_57161	chr12	32522905
solcap_snp_c2_41100	chr12	33853219
solcap_snp_c2_41097	chr12	33853769
solcap_snp_c2_4214	chr12	35283808
solcap_snp_c2_27779	chr12	35531719
solcap_snp_c2_27788	chr12	35538152
solcap_snp_c2_27771	chr12	35653078
solcap_snp_c2_27773	chr12	35653224
solcap_snp_c1_8581	chr12	35675934
solcap_snp_c2_45819	chr12	39794642
solcap_snp_c2_45803	chr12	40125403
solcap_snp_c2_45807	chr12	40126341
solcap_snp_c2_45808	chr12	40126394
solcap_snp_c2_45811	chr12	40126773
solcap_snp_c2_45812	chr12	40126787
solcap_snp_c2_18992	chr12	40655145
solcap_snp_c2_38367	chr12	41077683
solcap_snp_c2_19729	chr12	41527757
solcap_snp_c2_19727	chr12	41615052
solcap_snp_c2_19722	chr12	41670282
solcap_snp_c1_10050	chr12	42295148
solcap_snp_c2_13951	chr12	43525699
solcap_snp_c1_4502	chr12	43554547
solcap_snp_c2_30296	chr12	45433626
solcap_snp_c2_33630	chr12	45970798
solcap_snp_c1_10054	chr12	45972706
solcap_snp_c2_21077	chr12	46657785
solcap_snp_c2_53205	chr12	47233586
solcap_snp_c2_51049	chr12	48167367
solcap_snp_c2_51046	chr12	48177592
solcap_snp_c2_51047	chr12	48177610
solcap_snp_c2_49683	chr12	48605748
solcap_snp_c1_14396	chr12	48732241
solcap_snp_c2_48687	chr12	48851340
solcap_snp_c2_48010	chr12	49624443
solcap_snp_c2_48011	chr12	49624689
solcap_snp_c2_48012	chr12	49625274
solcap_snp_c2_48013	chr12	49625421
solcap_snp_c1_14197	chr12	49660431
solcap_snp_c2_43152	chr12	49994628
solcap_snp_c1_12702	chr12	50137237
solcap_snp_c2_17617	chr12	50382217
solcap_snp_c2_17615	chr12	50382493
solcap_snp_c2_17613	chr12	50389681
solcap_snp_c1_5784	chr12	50393752
